# Supplementary material
Source: publisher site journal article supplement (http://www.spandidos-publications.com/61/downloadSupplementary)
Supplement: Supplementary file 1 [file downloadSupplementary]

## Sheet: topblast
Table SIII. GO annotation analysis of differentially expessed proteins in the 2 h/0 h group.
Sequence name	Sequence desc.	Sequence length	Hit desc.	Hit ACC	E-Value	Similarity	Bit-Score	Alignment length	Positives
P60524	HBB_CHRBRHemoglobin subunit beta OS=Chrysocyon brachyurus GN=HBB PE=1 SV=1	146	sp|P60526|HBB_CHRBRHemoglobin subunit beta OS=Chrysocyon brachyurus GN=HBB PE=1 SV=1	P60526	1.62469e-102	100	298.13	146	146
P60529	HBA_CANLFHemoglobin subunit alpha OS=Canis lupus familiaris GN=HBA PE=1 SV=1	141	sp|P60529|HBA_CANLFHemoglobin subunit alpha OS=Canis lupus familiaris GN=HBA PE=1 SV=1	P60529	1.2284e-97	100	285.419	141	141
J9JHF7	HBA_CANLAHemoglobin subunit alpha OS=Canis latrans GN=HBA PE=1 SV=2	142	tr|J9JHF7|J9JHF7_CANLFUncharacterized protein OS=Canis lupus familiaris GN=LOC100855540 PE=3 SV=1	J9JHF7	7.00044e-99	100	288.5	142	142
J9JHZ3	HBB_CHRBRHemoglobin subunit beta OS=Chrysocyon brachyurus GN=HBB PE=1 SV=1	152	tr|J9JHZ3|J9JHZ3_CANLFUncharacterized protein OS=Canis lupus familiaris PE=3 SV=1	J9JHZ3	2.64749e-109	100	315.849	152	152
F1PGS2	F1PGS2_CANLFFibrinogen beta chain OS=Canis lupus familiaris GN=FGB PE=4 SV=2	491	tr|F1PGS2|F1PGS2_CANLFFibrinogen beta chain OS=Canis lupus familiaris GN=FGB PE=4 SV=2	F1PGS2	0	100	1033.09	491	491
F1P8G0	F1P8G0_CANLFFibrinogen gamma chain OS=Canis lupus familiaris GN=FGG PE=4 SV=2	437	tr|F1P8G0|F1P8G0_CANLFFibrinogen gamma chain OS=Canis lupus familiaris GN=FGG PE=4 SV=2	F1P8G0	0	100	916.761	437	437
F1PBL4	F1PBL4_CANLFFibrinogen alpha chain OS=Canis lupus familiaris GN=FGA PE=4 SV=1	892	tr|F1PBL4|F1PBL4_CANLFFibrinogen alpha chain OS=Canis lupus familiaris GN=FGA PE=4 SV=1	F1PBL4	0	100	1833.92	892	892
P02677	G1MJH9_AILMEUncharacterized protein OS=Ailuropoda melanoleuca GN=FGB PE=4 SV=1	31	tr|G1MJH9|G1MJH9_AILMEUncharacterized protein OS=Ailuropoda melanoleuca GN=FGB PE=4 SV=1	G1MJH9	1.96196e-06	77	47.7506	35	27
F1PCG4	G9KIF5_MUSPFPeroxiredoxin 2 (Fragment) OS=Mustela putorius furo PE=2 SV=1	198	tr|F1PCG4|F1PCG4_CANLFUncharacterized protein OS=Canis lupus familiaris GN=PRDX2 PE=4 SV=2	F1PCG4	1.4295e-144	100	409.068	198	198
F1PDY8	M1EKL8_MUSPFCarbonic anhydrase II (Fragment) OS=Mustela putorius furo PE=2 SV=1	260	tr|F1PDY8|F1PDY8_CANLFUncharacterized protein OS=Canis lupus familiaris GN=CA2 PE=4 SV=2	F1PDY8	0	100	543.502	260	260
J9NVT1	L8B4I8_HUMANUbiquitin C OS=Homo sapiens GN= PE=4 SV=1	381	tr|F7G432|F7G432_CALJAUncharacterized protein (Fragment) OS=Callithrix jacchus GN=LOC100389688 PE=4 SV=1	F7G432	0	100	754.207	381	381
E2RQF8	U6D6D7_NEOVIExtracellular matrix 1 (Fragment) OS=Neovison vison GN=ECM1 PE=2 SV=1	352	tr|E2RQF8|E2RQF8_CANLFUncharacterized protein OS=Canis lupus familiaris GN=ECM1 PE=4 SV=2	E2RQF8	0	100	726.857	352	352
C0LQL0	C0LQL0_CANLF S100 OS=Canis lupus familiaris GN=S100A8 PE=2 SV=1	89	tr|C0LQL0|C0LQL0_CANLFProtein S100 OS=Canis lupus familiaris GN=S100A8 PE=2 SV=1	C0LQL0	4.7151e-59	100	183.341	89	89
J9NVE9	J9NVE9_CANLFSerum amyloid A OS=Canis lupus familiaris GN=LOC102155886 PE=3 SV=1	130	tr|J9NVE9|J9NVE9_CANLFSerum amyloid A protein OS=Canis lupus familiaris GN=LOC102155886 PE=3 SV=1	J9NVE9	2.39204e-92	100	271.166	130	130
E2RRU2	G9KQ98_MUSPFSphingomyelin acid-like 3A (Fragment) OS=Mustela putorius furo PE=2 SV=1	349	tr|E2RRU2|E2RRU2_CANLFUncharacterized protein OS=Canis lupus familiaris GN=SMPDL3A PE=4 SV=2	E2RRU2	0	100	729.554	349	349
F1P8V6	F1P8V6_CANLFMyoglobin OS=Canis lupus familiaris GN=MB PE=3 SV=1	154	tr|F1P8V6|F1P8V6_CANLFMyoglobin OS=Canis lupus familiaris GN=MB PE=3 SV=1	F1P8V6	4.29115e-107	100	310.457	154	154
F1PBK6	V9HWE3_HUMANCarbonic anhydrase isoform CRA_a OS=Homo sapiens GN=HEL-S-11 PE=2 SV=1	261	tr|F1PBK6|F1PBK6_CANLFUncharacterized protein OS=Canis lupus familiaris GN=CA1 PE=4 SV=2	F1PBK6	0	100	538.11	261	261
J9NWQ5	A8K1M2_HUMA highly Homo sapiens calmodulin 1 (phosphorylase delta) mRNA OS=Homo sapiens PE=2 SV=1	144	tr|J9NWQ5|J9NWQ5_CANLFUncharacterized protein OS=Canis lupus familiaris PE=4 SV=1	J9NWQ5	1.6601e-100	100	292.738	144	144
F1PBI6	TSP1_HUMANThrombospondin-1 OS=Homo sapiens GN=THBS1 PE=1 SV=2	1170	tr|F1PBI6|F1PBI6_CANLFUncharacterized protein OS=Canis lupus familiaris GN=THBS1 PE=4 SV=2	F1PBI6	0	100	2413.26	1170	1170
F1P6P2	A0A091CME3_FUKDATransgelin OS=Fukomys damarensis GN=H920_20495 PE=3 SV=1	199	tr|A0A091CME3|A0A091CME3_FUKDATransgelin OS=Fukomys damarensis GN=H920_20495 PE=3 SV=1	A0A091CME3	6.53493e-146	100	412.535	199	199
E2QUY2	G5AUD5_HETGACostars family ABRACL OS=Heterocephalus glaber GN=ABRACL PE=4 SV=1	81	tr|E2QUY2|E2QUY2_CANLFUncharacterized protein OS=Canis lupus familiaris GN=ABRACL PE=4 SV=1	E2QUY2	8.42317e-51	100	161.77	81	81
J9P0D4	J9P0D4_CANLFUncharacterized protein OS=Canis lupus familiaris PE=4 SV=1	141	tr|J9P0D4|J9P0D4_CANLFUncharacterized protein OS=Canis lupus familiaris PE=4 SV=1	J9P0D4	6.50274e-99	100	288.5	141	141
F1P9M6	F1P9M6_CANLFUncharacterized protein OS=Canis lupus familiaris PE=4 SV=2	99	tr|F1P9M6|F1P9M6_CANLFUncharacterized protein OS=Canis lupus familiaris PE=4 SV=2	F1P9M6	1.92064e-64	100	197.593	99	99
Q9MZD3	Q9MZD3_CANLFPeptidyl-prolyl cis-trans isomerase (Fragment) OS=Canis lupus familiaris PE=2 SV=1	156	tr|Q9MZD3|Q9MZD3_CANLFPeptidyl-prolyl cis-trans isomerase (Fragment) OS=Canis lupus familiaris PE=2 SV=1	Q9MZD3	3.50165e-111	100	320.857	156	156
F1PTS8	A4FV94_BOVINKRT6A OS=Bos taurus GN=KRT6A PE=2 SV=1	571	tr|F1PTS8|F1PTS8_CANLFUncharacterized protein OS=Canis lupus familiaris GN=LOC486523 PE=3 SV=1	F1PTS8	0	100	1150.96	571	571
J9P6T6	L8HQK3_9CETAMeiosis expressed 1 OS=Bos mutus GN=M91_17805 PE=4 SV=1	88	tr|L5L0L0|L5L0L0_PTEALMeiosis expressed protein 1 protein like protein OS=Pteropus alecto GN=PAL_GLEAN10015812 PE=4 SV=1	L5L0L0	1.01573e-58	100	182.956	88	88
F1P8A6	G7Q2X0_MACFA Z39Ig OS=Macaca fascicularis GN=EGM_18851 PE=4 SV=1	399	tr|F1P8A6|F1P8A6_CANLFUncharacterized protein OS=Canis lupus familiaris GN=VSIG4 PE=4 SV=2	F1P8A6	0	100	829.321	399	399
J9NYN2	CSRP1_RATCysteine and glycine-rich 1 OS=Rattus norvegicus GN=Csrp1 PE=1 SV=2	193	tr|J9NYN2|J9NYN2_CANLFUncharacterized protein OS=Canis lupus familiaris GN=CSRP1 PE=4 SV=1	J9NYN2	6.48177e-138	100	391.734	193	193
E2QSF4	G3HQP8_CRIGRTubulin beta chain OS=Cricetulus griseus GN=H671_1g3330 PE=3 SV=1	444	tr|G3HQP8|G3HQP8_CRIGRTubulin beta chain OS=Cricetulus griseus GN=H671_1g3330 PE=3 SV=1	G3HQP8	0	100	934.48	444	444
Q0QEN2	L5KVR4_PTEALATP synthase subunit beta OS=Pteropus alecto GN=PAL_GLEAN10004833 PE=3 SV=1	321	tr|L5KVR4|L5KVR4_PTEALATP synthase subunit beta OS=Pteropus alecto GN=PAL_GLEAN10004833 PE=3 SV=1	L5KVR4	0	100	656.751	321	321
J9NZW6	L8I3W2_9CETAApolipo F (Fragment) OS=Bos mutus GN=M91_19740 PE=4 SV=1	288	tr|J9NZW6|J9NZW6_CANLFUncharacterized protein OS=Canis lupus familiaris GN=APOF PE=4 SV=1	J9NZW6	0	100	592.038	288	288
F1P865	G9KNH0_MUSPFSideroflexin 4 (Fragment) OS=Mustela putorius furo GN=SFXN4 PE=2 SV=1	311	tr|F1P865|F1P865_CANLFUncharacterized protein OS=Canis lupus familiaris GN=SFXN4 PE=4 SV=2	F1P865	0	100	637.491	311	311
F1PE38	U6CVL5_NEOVICadherin-13 OS=Neovison vison GN=CAD13 PE=2 SV=1	608	tr|F1PE38|F1PE38_CANLFUncharacterized protein OS=Canis lupus familiaris GN=CDH13 PE=4 SV=2	F1PE38	0	100	1246.11	608	608
E2QW34	M3YTX0_MUSPFProteasome subunit beta type OS=Mustela putorius furo GN=PSMB2 PE=3 SV=1	201	tr|M3YTX0|M3YTX0_MUSPFProteasome subunit beta type OS=Mustela putorius furo GN=PSMB2 PE=3 SV=1	M3YTX0	7.94565e-148	100	417.542	201	201
E2R5H4	G5BBQ5_HETGAIntegrin-linked kinase OS=Heterocephalus glaber GN=ILK PE=4 SV=1	452	tr|G5BBQ5|G5BBQ5_HETGAIntegrin-linked protein kinase OS=Heterocephalus glaber GN=ILK PE=4 SV=1	G5BBQ5	0	100	946.036	452	452
J9P716	B5LX42_FELCATubulin beta chain OS=Felis catus PE=2 SV=1	596	tr|J9P716|J9P716_CANLFUncharacterized protein OS=Canis lupus familiaris GN=TUBB1 PE=3 SV=1	J9P716	0	100	1234.55	596	596
J9PB81	A0A061IJ91_CRIGRCathepsin G OS=Cricetulus griseus GN=H671_1g4192 PE=3 SV=1	247	tr|J9PB81|J9PB81_CANLFUncharacterized protein OS=Canis lupus familiaris GN=CTSG PE=3 SV=1	J9PB81	5.40263e-179	100	500.36	247	247
E2RIG8	Q6NXZ5_MOUSEADP-ribosylation factor-like 5B OS=Mus musculus GN=Arl5b PE=1 SV=1	180	tr|Q6NXZ5|Q6NXZ5_MOUSEADP-ribosylation factor-like 5B OS=Mus musculus GN=Arl5b PE=1 SV=1	Q6NXZ5	4.05081e-132	100	375.941	180	180
F1PPB6	H2Q5J5_PANTRDeoxyribose-phosphate aldolase ( ) OS=Pan troglodytes GN=DERA PE=2 SV=1	318	tr|F1PPB6|F1PPB6_CANLFUncharacterized protein OS=Canis lupus familiaris GN=DERA PE=4 SV=2	F1PPB6	0	100	655.21	318	318
F6X870	F6X870_CANLFUncharacterized protein OS=Canis lupus familiaris GN=PAM PE=4 SV=1	807	tr|F6X870|F6X870_CANLFUncharacterized protein OS=Canis lupus familiaris GN=PAM PE=4 SV=1	F6X870	0	100	1677.53	807	807
E2RB38	U3ELS9_CALJATropomyosin alpha-3 chain isoform 4 OS=Callithrix jacchus GN=TPM3 PE=2 SV=1	248	tr|E2RB38|E2RB38_CANLFUncharacterized protein OS=Canis lupus familiaris GN=TPM3 PE=3 SV=2	E2RB38	8.70734e-166	100	466.848	248	248
E2RI13	GPBP1_BOVINVasculin OS=Bos taurus GN=GPBP1 PE=2 SV=1	480	tr|E2RI13|E2RI13_CANLFUncharacterized protein OS=Canis lupus familiaris GN=GPBP1 PE=4 SV=2	E2RI13	0	100	992.26	480	480
F1PGC3	K9K225_HORSEInterferon-induced wit tetratricopeptide repeats 2 OS=Equus caballus PE=2 SV=1	468	tr|F1PGC3|F1PGC3_CANLFUncharacterized protein OS=Canis lupus familiaris GN=IFIT2 PE=4 SV=2	F1PGC3	0	100	973.385	468	468
E2RP87	M1EQN2_MUSPFFc of low affinity receptor (Fragment) OS=Mustela putorius furo PE=2 SV=1	249	tr|E2RP87|E2RP87_CANLFUncharacterized protein OS=Canis lupus familiaris GN=LOC478984 PE=4 SV=1	E2RP87	0	100	516.538	249	249
F5XVB0	F5XVB0_CANLFvon Willebrand factor OS=Canis lupus familiaris GN=VWF PE=2 SV=1	2813	tr|F5XVB0|F5XVB0_CANLFvon Willebrand factor OS=Canis lupus familiaris GN=VWF PE=2 SV=1	F5XVB0	0	100	5790.31	2813	2813
P52784	G1K296_CANLFATP-dependent 6-phosphofructokinase OS=Canis lupus familiaris GN=PFKM PE=2 SV=1	782	tr|G1K296|G1K296_CANLFATP-dependent 6-phosphofructokinase OS=Canis lupus familiaris GN=PFKM PE=2 SV=1	G1K296	0	100	1619.75	782	782
F1PF31	Q4LE33_HUMANTNC variant (Fragment) OS=Homo sapiens GN=TNC variant PE=2 SV=1	2233	tr|F1PF31|F1PF31_CANLFUncharacterized protein OS=Canis lupus familiaris GN=TNC PE=4 SV=1	F1PF31	0	100	4611.98	2233	2233
J9NU17	MYO1A_HUMANUnconventional myosin-Ia OS=Homo sapiens GN=MYO1A PE=2 SV=1	927	tr|F1PD99|F1PD99_CANLFUncharacterized protein OS=Canis lupus familiaris GN=MYO1A PE=3 SV=2	F1PD99	0	100	1926.37	927	927
E2RH23	K7C1M7_PANTRBromodomain and PHD finger 1 OS=Pan troglodytes GN=BRPF1 PE=2 SV=1	1220	tr|E2RH23|E2RH23_CANLFUncharacterized protein OS=Canis lupus familiaris GN=BRPF1 PE=4 SV=1	E2RH23	0	100	2545.38	1220	1220
E2RI99	E2RI99_CANLFSignal transducer and activator of transcription OS=Canis lupus familiaris GN=STAT1 PE=3 SV=2	750	tr|E2RI99|E2RI99_CANLFSignal transducer and activator of transcription OS=Canis lupus familiaris GN=STAT1 PE=3 SV=2	E2RI99	0	100	1555.42	750	750
J9NTJ3	J9NTJ3_CANLFUncharacterized protein OS=Canis lupus familiaris GN=MTCL1 PE=4 SV=1	985	tr|J9NTJ3|J9NTJ3_CANLFUncharacterized protein OS=Canis lupus familiaris GN=MTCL1 PE=4 SV=1	J9NTJ3	0	100	2015.35	985	985
F1Q432	TENX_HUMANTenascin-X OS=Homo sapiens GN=TNXB PE=1 SV=4	3874	tr|F1Q432|F1Q432_CANLFUncharacterized protein OS=Canis lupus familiaris GN=TNXB PE=4 SV=2	F1Q432	0	100	7841.11	3874	3874
F1Q0C1	K7D550_PANTRDopey family member 1 OS=Pan troglodytes GN=DOPEY1 PE=2 SV=1	2455	tr|F1Q0C1|F1Q0C1_CANLFUncharacterized protein OS=Canis lupus familiaris GN=DOPEY1 PE=4 SV=2	F1Q0C1	0	100	5076.92	2455	2455
F1PN38	L5KSA9_PTEALBaculoviral IAP repeat-containing 6 OS=Pteropus alecto GN=PAL_GLEAN10020317 PE=4 SV=1	4755	tr|F1PN38|F1PN38_CANLFUncharacterized protein OS=Canis lupus familiaris GN=BIRC6 PE=4 SV=2	F1PN38	0	100	9799.08	4755	4755
GO, Gene Ontology; bp, biological process; mf, molecular function; cc, cellular component; OS, OrganismName; GN, GeneName; PE, protein existence; SV, SequenceVersion; Sequence desc, Sequence description; Hit desc, hit description; Protein name and description; Hit ACC, protein ID number of the sequence; E-Value, reliability evaluation of the results; Similarity, positives/alignment; positives, nu…

## Sheet: protein2go
SeqName	Hit-Desc	GO-Group	GO-ID	Term
P60524	HBB_CHRBRHemoglobin subunit beta OS=Chrysocyon brachyurus GN=HBB PE=1 SV=1	C	GO:0005833	hemoglobin complex
P60524	HBB_CHRBRHemoglobin subunit beta OS=Chrysocyon brachyurus GN=HBB PE=1 SV=1	F	GO:0005506	iron ion binding
P60524	HBB_CHRBRHemoglobin subunit beta OS=Chrysocyon brachyurus GN=HBB PE=1 SV=1	F	GO:0019825	oxygen binding
P60524	HBB_CHRBRHemoglobin subunit beta OS=Chrysocyon brachyurus GN=HBB PE=1 SV=1	F	GO:0020037	heme binding
P60524	HBB_CHRBRHemoglobin subunit beta OS=Chrysocyon brachyurus GN=HBB PE=1 SV=1	P	GO:0015671	oxygen transport
P60529	HBA_CANLFHemoglobin subunit alpha OS=Canis lupus familiaris GN=HBA PE=1 SV=1	C	GO:0005833	hemoglobin complex
P60529	HBA_CANLFHemoglobin subunit alpha OS=Canis lupus familiaris GN=HBA PE=1 SV=1	F	GO:0005506	iron ion binding
P60529	HBA_CANLFHemoglobin subunit alpha OS=Canis lupus familiaris GN=HBA PE=1 SV=1	F	GO:0019825	oxygen binding
P60529	HBA_CANLFHemoglobin subunit alpha OS=Canis lupus familiaris GN=HBA PE=1 SV=1	F	GO:0020037	heme binding
P60529	HBA_CANLFHemoglobin subunit alpha OS=Canis lupus familiaris GN=HBA PE=1 SV=1	P	GO:0015671	oxygen transport
J9JHF7	HBA_CANLAHemoglobin subunit alpha OS=Canis latrans GN=HBA PE=1 SV=2	C	GO:0005833	hemoglobin complex
J9JHF7	HBA_CANLAHemoglobin subunit alpha OS=Canis latrans GN=HBA PE=1 SV=2	F	GO:0005506	iron ion binding
J9JHF7	HBA_CANLAHemoglobin subunit alpha OS=Canis latrans GN=HBA PE=1 SV=2	F	GO:0019825	oxygen binding
J9JHF7	HBA_CANLAHemoglobin subunit alpha OS=Canis latrans GN=HBA PE=1 SV=2	F	GO:0020037	heme binding
J9JHF7	HBA_CANLAHemoglobin subunit alpha OS=Canis latrans GN=HBA PE=1 SV=2	P	GO:0015671	oxygen transport
J9JHZ3	HBB_CHRBRHemoglobin subunit beta OS=Chrysocyon brachyurus GN=HBB PE=1 SV=1	C	GO:0005833	hemoglobin complex
J9JHZ3	HBB_CHRBRHemoglobin subunit beta OS=Chrysocyon brachyurus GN=HBB PE=1 SV=1	F	GO:0005506	iron ion binding
J9JHZ3	HBB_CHRBRHemoglobin subunit beta OS=Chrysocyon brachyurus GN=HBB PE=1 SV=1	F	GO:0019825	oxygen binding
J9JHZ3	HBB_CHRBRHemoglobin subunit beta OS=Chrysocyon brachyurus GN=HBB PE=1 SV=1	F	GO:0020037	heme binding
J9JHZ3	HBB_CHRBRHemoglobin subunit beta OS=Chrysocyon brachyurus GN=HBB PE=1 SV=1	P	GO:0015671	oxygen transport
F1PGS2	F1PGS2_CANLFFibrinogen beta chain OS=Canis lupus familiaris GN=FGB PE=4 SV=2	C	GO:0005577	fibrinogen complex
F1PGS2	F1PGS2_CANLFFibrinogen beta chain OS=Canis lupus familiaris GN=FGB PE=4 SV=2	C	GO:0009897	external side of plasma membrane
F1PGS2	F1PGS2_CANLFFibrinogen beta chain OS=Canis lupus familiaris GN=FGB PE=4 SV=2	C	GO:0031091	platelet alpha granule
F1PGS2	F1PGS2_CANLFFibrinogen beta chain OS=Canis lupus familiaris GN=FGB PE=4 SV=2	C	GO:0070062	extracellular vesicular exosome
F1PGS2	F1PGS2_CANLFFibrinogen beta chain OS=Canis lupus familiaris GN=FGB PE=4 SV=2	C	GO:0072562	blood microparticle
F1PGS2	F1PGS2_CANLFFibrinogen beta chain OS=Canis lupus familiaris GN=FGB PE=4 SV=2	F	GO:0005102	receptor binding
F1PGS2	F1PGS2_CANLFFibrinogen beta chain OS=Canis lupus familiaris GN=FGB PE=4 SV=2	F	GO:0005198	structural molecule activity
F1PGS2	F1PGS2_CANLFFibrinogen beta chain OS=Canis lupus familiaris GN=FGB PE=4 SV=2	F	GO:0030674	protein binding, bridging
F1PGS2	F1PGS2_CANLFFibrinogen beta chain OS=Canis lupus familiaris GN=FGB PE=4 SV=2	F	GO:0050839	cell adhesion molecule binding
F1PGS2	F1PGS2_CANLFFibrinogen beta chain OS=Canis lupus familiaris GN=FGB PE=4 SV=2	F	GO:0051087	chaperone binding
F1PGS2	F1PGS2_CANLFFibrinogen beta chain OS=Canis lupus familiaris GN=FGB PE=4 SV=2	P	GO:0007160	cell-matrix adhesion
F1PGS2	F1PGS2_CANLFFibrinogen beta chain OS=Canis lupus familiaris GN=FGB PE=4 SV=2	P	GO:0031639	plasminogen activation
F1PGS2	F1PGS2_CANLFFibrinogen beta chain OS=Canis lupus familiaris GN=FGB PE=4 SV=2	P	GO:0034116	positive regulation of heterotypic cell-cell adhesion
F1PGS2	F1PGS2_CANLFFibrinogen beta chain OS=Canis lupus familiaris GN=FGB PE=4 SV=2	P	GO:0042730	fibrinolysis
F1PGS2	F1PGS2_CANLFFibrinogen beta chain OS=Canis lupus familiaris GN=FGB PE=4 SV=2	P	GO:0043152	induction of bacterial agglutination
F1PGS2	F1PGS2_CANLFFibrinogen beta chain OS=Canis lupus familiaris GN=FGB PE=4 SV=2	P	GO:0045907	positive regulation of vasoconstriction
F1PGS2	F1PGS2_CANLFFibrinogen beta chain OS=Canis lupus familiaris GN=FGB PE=4 SV=2	P	GO:0045921	positive regulation of exocytosis
F1PGS2	F1PGS2_CANLFFibrinogen beta chain OS=Canis lupus familiaris GN=FGB PE=4 SV=2	P	GO:0050714	positive regulation of protein secretion
F1PGS2	F1PGS2_CANLFFibrinogen beta chain OS=Canis lupus familiaris GN=FGB PE=4 SV=2	P	GO:0051258	protein polymerization
F1PGS2	F1PGS2_CANLFFibrinogen beta chain OS=Canis lupus familiaris GN=FGB PE=4 SV=2	P	GO:0051592	response to calcium ion
F1PGS2	F1PGS2_CANLFFibrinogen beta chain OS=Canis lupus familiaris GN=FGB PE=4 SV=2	P	GO:0070374	positive regulation of ERK1 and ERK2 cascade
F1PGS2	F1PGS2_CANLFFibrinogen beta chain OS=Canis lupus familiaris GN=FGB PE=4 SV=2	P	GO:0070527	platelet aggregation
F1PGS2	F1PGS2_CANLFFibrinogen beta chain OS=Canis lupus familiaris GN=FGB PE=4 SV=2	P	GO:0072378	blood coagulation, fibrin clot formation
F1PGS2	F1PGS2_CANLFFibrinogen beta chain OS=Canis lupus familiaris GN=FGB PE=4 SV=2	P	GO:0090277	positive regulation of peptide hormone secretion
F1PGS2	F1PGS2_CANLFFibrinogen beta chain OS=Canis lupus familiaris GN=FGB PE=4 SV=2	P	GO:1902042	negative regulation of extrinsic apoptotic signaling pathway via death domain receptors
F1PGS2	F1PGS2_CANLFFibrinogen beta chain OS=Canis lupus familiaris GN=FGB PE=4 SV=2	P	GO:2000352	negative regulation of endothelial cell apoptotic process
F1P8G0	F1P8G0_CANLFFibrinogen gamma chain OS=Canis lupus familiaris GN=FGG PE=4 SV=2	C	GO:0005577	fibrinogen complex
F1P8G0	F1P8G0_CANLFFibrinogen gamma chain OS=Canis lupus familiaris GN=FGG PE=4 SV=2	C	GO:0044464	cell part
F1P8G0	F1P8G0_CANLFFibrinogen gamma chain OS=Canis lupus familiaris GN=FGG PE=4 SV=2	F	GO:0005102	receptor binding
F1P8G0	F1P8G0_CANLFFibrinogen gamma chain OS=Canis lupus familiaris GN=FGG PE=4 SV=2	F	GO:0030674	protein binding, bridging
F1P8G0	F1P8G0_CANLFFibrinogen gamma chain OS=Canis lupus familiaris GN=FGG PE=4 SV=2	P	GO:0007165	signal transduction
F1P8G0	F1P8G0_CANLFFibrinogen gamma chain OS=Canis lupus familiaris GN=FGG PE=4 SV=2	P	GO:0030168	platelet activation
F1P8G0	F1P8G0_CANLFFibrinogen gamma chain OS=Canis lupus familiaris GN=FGG PE=4 SV=2	P	GO:0048522	positive regulation of cellular process
F1P8G0	F1P8G0_CANLFFibrinogen gamma chain OS=Canis lupus familiaris GN=FGG PE=4 SV=2	P	GO:0051258	protein polymerization
F1PBL4	F1PBL4_CANLFFibrinogen alpha chain OS=Canis lupus familiaris GN=FGA PE=4 SV=1	C	GO:0005577	fibrinogen complex
F1PBL4	F1PBL4_CANLFFibrinogen alpha chain OS=Canis lupus familiaris GN=FGA PE=4 SV=1	C	GO:0044464	cell part
F1PBL4	F1PBL4_CANLFFibrinogen alpha chain OS=Canis lupus familiaris GN=FGA PE=4 SV=1	F	GO:0005102	receptor binding
F1PBL4	F1PBL4_CANLFFibrinogen alpha chain OS=Canis lupus familiaris GN=FGA PE=4 SV=1	F	GO:0030674	protein binding, bridging
F1PBL4	F1PBL4_CANLFFibrinogen alpha chain OS=Canis lupus familiaris GN=FGA PE=4 SV=1	P	GO:0007165	signal transduction
F1PBL4	F1PBL4_CANLFFibrinogen alpha chain OS=Canis lupus familiaris GN=FGA PE=4 SV=1	P	GO:0030168	platelet activation
F1PBL4	F1PBL4_CANLFFibrinogen alpha chain OS=Canis lupus familiaris GN=FGA PE=4 SV=1	P	GO:0048522	positive regulation of cellular process
F1PBL4	F1PBL4_CANLFFibrinogen alpha chain OS=Canis lupus familiaris GN=FGA PE=4 SV=1	P	GO:0051258	protein polymerization
F1PCG4	G9KIF5_MUSPFPeroxiredoxin 2 (Fragment) OS=Mustela putorius furo PE=2 SV=1	F	GO:0008379	thioredoxin peroxidase activity
F1PCG4	G9KIF5_MUSPFPeroxiredoxin 2 (Fragment) OS=Mustela putorius furo PE=2 SV=1	P	GO:0019430	removal of superoxide radicals
F1PCG4	G9KIF5_MUSPFPeroxiredoxin 2 (Fragment) OS=Mustela putorius furo PE=2 SV=1	P	GO:0045454	cell redox homeostasis
F1PCG4	G9KIF5_MUSPFPeroxiredoxin 2 (Fragment) OS=Mustela putorius furo PE=2 SV=1	P	GO:0055114	oxidation-reduction process
F1PCG4	G9KIF5_MUSPFPeroxiredoxin 2 (Fragment) OS=Mustela putorius furo PE=2 SV=1	P	GO:0006804	peroxidase reaction
F1PDY8	M1EKL8_MUSPFCarbonic anhydrase II (Fragment) OS=Mustela putorius furo PE=2 SV=1	C	GO:0044464	cell part
F1PDY8	M1EKL8_MUSPFCarbonic anhydrase II (Fragment) OS=Mustela putorius furo PE=2 SV=1	P	GO:0042221	response to chemical stimulus
F1PDY8	M1EKL8_MUSPFCarbonic anhydrase II (Fragment) OS=Mustela putorius furo PE=2 SV=1	P	GO:0044763	single-organism cellular process
F1PDY8	M1EKL8_MUSPFCarbonic anhydrase II (Fragment) OS=Mustela putorius furo PE=2 SV=1	P	GO:0048518	positive regulation of biological process
F1PDY8	M1EKL8_MUSPFCarbonic anhydrase II (Fragment) OS=Mustela putorius furo PE=2 SV=1	P	GO:0050794	regulation of cellular process
J9NVT1	L8B4I8_HUMANUbiquitin C OS=Homo sapiens GN= PE=4 SV=1	F	GO:0005515	protein binding
J9NVT1	L8B4I8_HUMANUbiquitin C OS=Homo sapiens GN= PE=4 SV=1	P	GO:0044702	single organism reproductive process
J9NVT1	L8B4I8_HUMANUbiquitin C OS=Homo sapiens GN= PE=4 SV=1	P	GO:0044763	single-organism cellular process
J9NVT1	L8B4I8_HUMANUbiquitin C OS=Homo sapiens GN= PE=4 SV=1	P	GO:0048513	organ development
E2RQF8	U6D6D7_NEOVIExtracellular matrix 1 (Fragment) OS=Neovison vison GN=ECM1 PE=2 SV=1	C	GO:0005615	extracellular space
E2RQF8	U6D6D7_NEOVIExtracellular matrix 1 (Fragment) OS=Neovison vison GN=ECM1 PE=2 SV=1	F	GO:0005515	protein binding
E2RQF8	U6D6D7_NEOVIExtracellular matrix 1 (Fragment) OS=Neovison vison GN=ECM1 PE=2 SV=1	P	GO:0007165	signal transduction
C0LQL0	C0LQL0_CANLF S100 OS=Canis lupus familiaris GN=S100A8 PE=2 SV=1	F	GO:0005509	calcium ion binding
C0LQL0	C0LQL0_CANLF S100 OS=Canis lupus familiaris GN=S100A8 PE=2 SV=1	F	GO:0008017	microtubule binding
C0LQL0	C0LQL0_CANLF S100 OS=Canis lupus familiaris GN=S100A8 PE=2 SV=1	F	GO:0008270	zinc ion binding
C0LQL0	C0LQL0_CANLF S100 OS=Canis lupus familiaris GN=S100A8 PE=2 SV=1	F	GO:0035662	Toll-like receptor 4 binding
C0LQL0	C0LQL0_CANLF S100 OS=Canis lupus familiaris GN=S100A8 PE=2 SV=1	F	GO:0050544	arachidonic acid binding
C0LQL0	C0LQL0_CANLF S100 OS=Canis lupus familiaris GN=S100A8 PE=2 SV=1	F	GO:0050786	RAGE receptor binding
C0LQL0	C0LQL0_CANLF S100 OS=Canis lupus familiaris GN=S100A8 PE=2 SV=1	P	GO:0044699	single-organism process
C0LQL0	C0LQL0_CANLF S100 OS=Canis lupus familiaris GN=S100A8 PE=2 SV=1	P	GO:0045087	innate immune response
C0LQL0	C0LQL0_CANLF S100 OS=Canis lupus familiaris GN=S100A8 PE=2 SV=1	P	GO:0048518	positive regulation of biological process
C0LQL0	C0LQL0_CANLF S100 OS=Canis lupus familiaris GN=S100A8 PE=2 SV=1	P	GO:0050727	regulation of inflammatory response
C0LQL0	C0LQL0_CANLF S100 OS=Canis lupus familiaris GN=S100A8 PE=2 SV=1	C	GO:0045298	tubulin complex
C0LQL0	C0LQL0_CANLF S100 OS=Canis lupus familiaris GN=S100A8 PE=2 SV=1	P	GO:0007165	signal transduction
J9NVE9	J9NVE9_CANLFSerum amyloid A OS=Canis lupus familiaris GN=LOC102155886 PE=3 SV=1	C	GO:0005576	extracellular region
J9NVE9	J9NVE9_CANLFSerum amyloid A OS=Canis lupus familiaris GN=LOC102155886 PE=3 SV=1	P	GO:0006953	acute-phase response
J9NVE9	J9NVE9_CANLFSerum amyloid A OS=Canis lupus familiaris GN=LOC102155886 PE=3 SV=1	P	GO:0010739	positive regulation of protein kinase A signaling cascade
J9NVE9	J9NVE9_CANLFSerum amyloid A OS=Canis lupus familiaris GN=LOC102155886 PE=3 SV=1	P	GO:0033138	positive regulation of peptidyl-serine phosphorylation
J9NVE9	J9NVE9_CANLFSerum amyloid A OS=Canis lupus familiaris GN=LOC102155886 PE=3 SV=1	P	GO:0042221	response to chemical stimulus
J9NVE9	J9NVE9_CANLFSerum amyloid A OS=Canis lupus familiaris GN=LOC102155886 PE=3 SV=1	P	GO:0044242	cellular lipid catabolic process
J9NVE9	J9NVE9_CANLFSerum amyloid A OS=Canis lupus familiaris GN=LOC102155886 PE=3 SV=1	P	GO:0045892	negative regulation of transcription, DNA-dependent
J9NVE9	J9NVE9_CANLFSerum amyloid A OS=Canis lupus familiaris GN=LOC102155886 PE=3 SV=1	P	GO:0050996	positive regulation of lipid catabolic process
J9NVE9	J9NVE9_CANLFSerum amyloid A OS=Canis lupus familiaris GN=LOC102155886 PE=3 SV=1	P	GO:0070374	positive regulation of ERK1 and ERK2 cascade
E2RRU2	G9KQ98_MUSPFSphingomyelin acid-like 3A (Fragment) OS=Mustela putorius furo PE=2 SV=1	C	GO:0044421	extracellular region part
E2RRU2	G9KQ98_MUSPFSphingomyelin acid-like 3A (Fragment) OS=Mustela putorius furo PE=2 SV=1	F	GO:0016787	hydrolase activity
F1P8V6	F1P8V6_CANLFMyoglobin OS=Canis lupus familiaris GN=MB PE=3 SV=1	F	GO:0019825	oxygen binding
F1P8V6	F1P8V6_CANLFMyoglobin OS=Canis lupus familiaris GN=MB PE=3 SV=1	F	GO:0020037	heme binding
F1P8V6	F1P8V6_CANLFMyoglobin OS=Canis lupus familiaris GN=MB PE=3 SV=1	P	GO:0015671	oxygen transport
F1PBK6	V9HWE3_HUMANCarbonic anhydrase isoform CRA_a OS=Homo sapiens GN=HEL-S-11 PE=2 SV=1	C	GO:0005737	cytoplasm
F1PBK6	V9HWE3_HUMANCarbonic anhydrase isoform CRA_a OS=Homo sapiens GN=HEL-S-11 PE=2 SV=1	C	GO:0070062	extracellular vesicular exosome
F1PBK6	V9HWE3_HUMANCarbonic anhydrase isoform CRA_a OS=Homo sapiens GN=HEL-S-11 PE=2 SV=1	F	GO:0004064	arylesterase activity
F1PBK6	V9HWE3_HUMANCarbonic anhydrase isoform CRA_a OS=Homo sapiens GN=HEL-S-11 PE=2 SV=1	F	GO:0004089	carbonate dehydratase activity
F1PBK6	V9HWE3_HUMANCarbonic anhydrase isoform CRA_a OS=Homo sapiens GN=HEL-S-11 PE=2 SV=1	F	GO:0005515	protein binding
F1PBK6	V9HWE3_HUMANCarbonic anhydrase isoform CRA_a OS=Homo sapiens GN=HEL-S-11 PE=2 SV=1	F	GO:0008270	zinc ion binding
F1PBK6	V9HWE3_HUMANCarbonic anhydrase isoform CRA_a OS=Homo sapiens GN=HEL-S-11 PE=2 SV=1	P	GO:0006730	one-carbon metabolic process
F1PBK6	V9HWE3_HUMANCarbonic anhydrase isoform CRA_a OS=Homo sapiens GN=HEL-S-11 PE=2 SV=1	P	GO:0006807	nitrogen compound metabolic process
J9NWQ5	A8K1M2_HUMA highly Homo sapiens calmodulin 1 (phosphorylase delta) mRNA OS=Homo sapiens PE=2 SV=1	C	GO:0043229	intracellular organelle
J9NWQ5	A8K1M2_HUMA highly Homo sapiens calmodulin 1 (phosphorylase delta) mRNA OS=Homo sapiens PE=2 SV=1	F	GO:0005509	calcium ion binding
J9NWQ5	A8K1M2_HUMA highly Homo sapiens calmodulin 1 (phosphorylase delta) mRNA OS=Homo sapiens PE=2 SV=1	F	GO:0005515	protein binding
J9NWQ5	A8K1M2_HUMA highly Homo sapiens calmodulin 1 (phosphorylase delta) mRNA OS=Homo sapiens PE=2 SV=1	P	GO:0050794	regulation of cellular process
F1PBI6	TSP1_HUMANThrombospondin-1 OS=Homo sapiens GN=THBS1 PE=1 SV=2	C	GO:0005577	fibrinogen complex
F1PBI6	TSP1_HUMANThrombospondin-1 OS=Homo sapiens GN=THBS1 PE=1 SV=2	C	GO:0005788	endoplasmic reticulum lumen
F1PBI6	TSP1_HUMANThrombospondin-1 OS=Homo sapiens GN=THBS1 PE=1 SV=2	C	GO:0009897	external side of plasma membrane
F1PBI6	TSP1_HUMANThrombospondin-1 OS=Homo sapiens GN=THBS1 PE=1 SV=2	C	GO:0031012	extracellular matrix
F1PBI6	TSP1_HUMANThrombospondin-1 OS=Homo sapiens GN=THBS1 PE=1 SV=2	C	GO:0031093	platelet alpha granule lumen
F1PBI6	TSP1_HUMANThrombospondin-1 OS=Homo sapiens GN=THBS1 PE=1 SV=2	C	GO:0070062	extracellular vesicular exosome
F1PBI6	TSP1_HUMANThrombospondin-1 OS=Homo sapiens GN=THBS1 PE=1 SV=2	F	GO:0001786	phosphatidylserine binding
F1PBI6	TSP1_HUMANThrombospondin-1 OS=Homo sapiens GN=THBS1 PE=1 SV=2	F	GO:0001968	fibronectin binding
F1PBI6	TSP1_HUMANThrombospondin-1 OS=Homo sapiens GN=THBS1 PE=1 SV=2	F	GO:0005178	integrin binding
F1PBI6	TSP1_HUMANThrombospondin-1 OS=Homo sapiens GN=THBS1 PE=1 SV=2	F	GO:0005509	calcium ion binding
F1PBI6	TSP1_HUMANThrombospondin-1 OS=Homo sapiens GN=THBS1 PE=1 SV=2	F	GO:0008201	heparin binding
F1PBI6	TSP1_HUMANThrombospondin-1 OS=Homo sapiens GN=THBS1 PE=1 SV=2	F	GO:0017134	fibroblast growth factor binding
F1PBI6	TSP1_HUMANThrombospondin-1 OS=Homo sapiens GN=THBS1 PE=1 SV=2	F	GO:0030169	low-density lipoprotein particle binding
F1PBI6	TSP1_HUMANThrombospondin-1 OS=Homo sapiens GN=THBS1 PE=1 SV=2	F	GO:0043236	laminin binding
F1PBI6	TSP1_HUMANThrombospondin-1 OS=Homo sapiens GN=THBS1 PE=1 SV=2	F	GO:0043394	proteoglycan binding
F1PBI6	TSP1_HUMANThrombospondin-1 OS=Homo sapiens GN=THBS1 PE=1 SV=2	F	GO:0050431	transforming growth factor beta binding
F1PBI6	TSP1_HUMANThrombospondin-1 OS=Homo sapiens GN=THBS1 PE=1 SV=2	F	GO:0070051	fibrinogen binding
F1PBI6	TSP1_HUMANThrombospondin-1 OS=Homo sapiens GN=THBS1 PE=1 SV=2	F	GO:0070052	collagen V binding
F1PBI6	TSP1_HUMANThrombospondin-1 OS=Homo sapiens GN=THBS1 PE=1 SV=2	P	GO:0000187	activation of MAPK activity
F1PBI6	TSP1_HUMANThrombospondin-1 OS=Homo sapiens GN=THBS1 PE=1 SV=2	P	GO:0001937	negative regulation of endothelial cell proliferation
F1PBI6	TSP1_HUMANThrombospondin-1 OS=Homo sapiens GN=THBS1 PE=1 SV=2	P	GO:0002040	sprouting angiogenesis
F1PBI6	TSP1_HUMANThrombospondin-1 OS=Homo sapiens GN=THBS1 PE=1 SV=2	P	GO:0002544	chronic inflammatory response
F1PBI6	TSP1_HUMANThrombospondin-1 OS=Homo sapiens GN=THBS1 PE=1 SV=2	P	GO:0002576	platelet degranulation
F1PBI6	TSP1_HUMANThrombospondin-1 OS=Homo sapiens GN=THBS1 PE=1 SV=2	P	GO:0002581	negative regulation of antigen processing and presentation of peptide or polysaccharide antigen via MHC class II
F1PBI6	TSP1_HUMANThrombospondin-1 OS=Homo sapiens GN=THBS1 PE=1 SV=2	P	GO:0002605	negative regulation of dendritic cell antigen processing and presentation
F1PBI6	TSP1_HUMANThrombospondin-1 OS=Homo sapiens GN=THBS1 PE=1 SV=2	P	GO:0006955	immune response
F1PBI6	TSP1_HUMANThrombospondin-1 OS=Homo sapiens GN=THBS1 PE=1 SV=2	P	GO:0007050	cell cycle arrest
F1PBI6	TSP1_HUMANThrombospondin-1 OS=Homo sapiens GN=THBS1 PE=1 SV=2	P	GO:0009749	response to glucose stimulus
F1PBI6	TSP1_HUMANThrombospondin-1 OS=Homo sapiens GN=THBS1 PE=1 SV=2	P	GO:0010748	negative regulation of plasma membrane long-chain fatty acid transport
F1PBI6	TSP1_HUMANThrombospondin-1 OS=Homo sapiens GN=THBS1 PE=1 SV=2	P	GO:0010751	negative regulation of nitric oxide mediated signal transduction
F1PBI6	TSP1_HUMANThrombospondin-1 OS=Homo sapiens GN=THBS1 PE=1 SV=2	P	GO:0010754	negative regulation of cGMP-mediated signaling
F1PBI6	TSP1_HUMANThrombospondin-1 OS=Homo sapiens GN=THBS1 PE=1 SV=2	P	GO:0010757	negative regulation of plasminogen activation
F1PBI6	TSP1_HUMANThrombospondin-1 OS=Homo sapiens GN=THBS1 PE=1 SV=2	P	GO:0010763	positive regulation of fibroblast migration
F1PBI6	TSP1_HUMANThrombospondin-1 OS=Homo sapiens GN=THBS1 PE=1 SV=2	P	GO:0016525	negative regulation of angiogenesis
F1PBI6	TSP1_HUMANThrombospondin-1 OS=Homo sapiens GN=THBS1 PE=1 SV=2	P	GO:0018149	peptide cross-linking
F1PBI6	TSP1_HUMANThrombospondin-1 OS=Homo sapiens GN=THBS1 PE=1 SV=2	P	GO:0030198	extracellular matrix organization
F1PBI6	TSP1_HUMANThrombospondin-1 OS=Homo sapiens GN=THBS1 PE=1 SV=2	P	GO:0030511	positive regulation of transforming growth factor beta receptor signaling pathway
F1PBI6	TSP1_HUMANThrombospondin-1 OS=Homo sapiens GN=THBS1 PE=1 SV=2	P	GO:0030823	regulation of cGMP metabolic process
F1PBI6	TSP1_HUMANThrombospondin-1 OS=Homo sapiens GN=THBS1 PE=1 SV=2	P	GO:0032026	response to magnesium ion
F1PBI6	TSP1_HUMANThrombospondin-1 OS=Homo sapiens GN=THBS1 PE=1 SV=2	P	GO:0032570	response to progesterone stimulus
F1PBI6	TSP1_HUMANThrombospondin-1 OS=Homo sapiens GN=THBS1 PE=1 SV=2	P	GO:0032695	negative regulation of interleukin-12 production
F1PBI6	TSP1_HUMANThrombospondin-1 OS=Homo sapiens GN=THBS1 PE=1 SV=2	P	GO:0036066	protein O-linked fucosylation
F1PBI6	TSP1_HUMANThrombospondin-1 OS=Homo sapiens GN=THBS1 PE=1 SV=2	P	GO:0040037	negative regulation of fibroblast growth factor receptor signaling pathway
F1PBI6	TSP1_HUMANThrombospondin-1 OS=Homo sapiens GN=THBS1 PE=1 SV=2	P	GO:0042493	response to drug
F1PBI6	TSP1_HUMANThrombospondin-1 OS=Homo sapiens GN=THBS1 PE=1 SV=2	P	GO:0042535	positive regulation of tumor necrosis factor biosynthetic process
F1PBI6	TSP1_HUMANThrombospondin-1 OS=Homo sapiens GN=THBS1 PE=1 SV=2	P	GO:0043032	positive regulation of macrophage activation
F1PBI6	TSP1_HUMANThrombospondin-1 OS=Homo sapiens GN=THBS1 PE=1 SV=2	P	GO:0043154	negative regulation of cysteine-type endopeptidase activity involved in apoptotic process
F1PBI6	TSP1_HUMANThrombospondin-1 OS=Homo sapiens GN=THBS1 PE=1 SV=2	P	GO:0043536	positive regulation of blood vessel endothelial cell migration
F1PBI6	TSP1_HUMANThrombospondin-1 OS=Homo sapiens GN=THBS1 PE=1 SV=2	P	GO:0043537	negative regulation of blood vessel endothelial cell migration
F1PBI6	TSP1_HUMANThrombospondin-1 OS=Homo sapiens GN=THBS1 PE=1 SV=2	P	GO:0043652	engulfment of apoptotic cell
F1PBI6	TSP1_HUMANThrombospondin-1 OS=Homo sapiens GN=THBS1 PE=1 SV=2	P	GO:0045727	positive regulation of translation
F1PBI6	TSP1_HUMANThrombospondin-1 OS=Homo sapiens GN=THBS1 PE=1 SV=2	P	GO:0045766	positive regulation of angiogenesis
F1PBI6	TSP1_HUMANThrombospondin-1 OS=Homo sapiens GN=THBS1 PE=1 SV=2	P	GO:0050921	positive regulation of chemotaxis
F1PBI6	TSP1_HUMANThrombospondin-1 OS=Homo sapiens GN=THBS1 PE=1 SV=2	P	GO:0051592	response to calcium ion
F1PBI6	TSP1_HUMANThrombospondin-1 OS=Homo sapiens GN=THBS1 PE=1 SV=2	P	GO:0051895	negative regulation of focal adhesion assembly
F1PBI6	TSP1_HUMANThrombospondin-1 OS=Homo sapiens GN=THBS1 PE=1 SV=2	P	GO:0051897	positive regulation of protein kinase B signaling cascade
F1PBI6	TSP1_HUMANThrombospondin-1 OS=Homo sapiens GN=THBS1 PE=1 SV=2	P	GO:0051918	negative regulation of fibrinolysis
F1PBI6	TSP1_HUMANThrombospondin-1 OS=Homo sapiens GN=THBS1 PE=1 SV=2	P	GO:1902043	positive regulation of extrinsic apoptotic signaling pathway via death domain receptors
F1PBI6	TSP1_HUMANThrombospondin-1 OS=Homo sapiens GN=THBS1 PE=1 SV=2	P	GO:2000353	positive regulation of endothelial cell apoptotic process
F1PBI6	TSP1_HUMANThrombospondin-1 OS=Homo sapiens GN=THBS1 PE=1 SV=2	P	GO:2000379	positive regulation of reactive oxygen species metabolic process
F1PBI6	TSP1_HUMANThrombospondin-1 OS=Homo sapiens GN=THBS1 PE=1 SV=2	P	GO:2001027	negative regulation of endothelial cell chemotaxis
F1PBI6	TSP1_HUMANThrombospondin-1 OS=Homo sapiens GN=THBS1 PE=1 SV=2	P	GO:2001237	negative regulation of extrinsic apoptotic signaling pathway
F1PBI6	TSP1_HUMANThrombospondin-1 OS=Homo sapiens GN=THBS1 PE=1 SV=2	C	GO:0008305	integrin complex
F1P6P2	A0A091CME3_FUKDATransgelin OS=Fukomys damarensis GN=H920_20495 PE=3 SV=1	C	GO:0031982	vesicle
F1P6P2	A0A091CME3_FUKDATransgelin OS=Fukomys damarensis GN=H920_20495 PE=3 SV=1	F	GO:0005515	protein binding
J9P0D4	J9P0D4_CANLFUncharacterized protein OS=Canis lupus familiaris PE=4 SV=1	F	GO:0005515	protein binding
J9P0D4	J9P0D4_CANLFUncharacterized protein OS=Canis lupus familiaris PE=4 SV=1	P	GO:0002376	immune system process
F1P9M6	F1P9M6_CANLFUncharacterized protein OS=Canis lupus familiaris PE=4 SV=2	F	GO:0005515	protein binding
F1P9M6	F1P9M6_CANLFUncharacterized protein OS=Canis lupus familiaris PE=4 SV=2	P	GO:0002376	immune system process
Q9MZD3	Q9MZD3_CANLFPeptidyl-prolyl cis-trans isomerase (Fragment) OS=Canis lupus familiaris PE=2 SV=1	C	GO:0005737	cytoplasm
Q9MZD3	Q9MZD3_CANLFPeptidyl-prolyl cis-trans isomerase (Fragment) OS=Canis lupus familiaris PE=2 SV=1	C	GO:0043227	membrane-bounded organelle
Q9MZD3	Q9MZD3_CANLFPeptidyl-prolyl cis-trans isomerase (Fragment) OS=Canis lupus familiaris PE=2 SV=1	F	GO:0003755	peptidyl-prolyl cis-trans isomerase activity
Q9MZD3	Q9MZD3_CANLFPeptidyl-prolyl cis-trans isomerase (Fragment) OS=Canis lupus familiaris PE=2 SV=1	P	GO:0000413	protein peptidyl-prolyl isomerization
Q9MZD3	Q9MZD3_CANLFPeptidyl-prolyl cis-trans isomerase (Fragment) OS=Canis lupus familiaris PE=2 SV=1	P	GO:0006457	protein folding
Q9MZD3	Q9MZD3_CANLFPeptidyl-prolyl cis-trans isomerase (Fragment) OS=Canis lupus familiaris PE=2 SV=1	P	GO:0045069	regulation of viral genome replication
F1PTS8	A4FV94_BOVINKRT6A OS=Bos taurus GN=KRT6A PE=2 SV=1	C	GO:0045095	keratin filament
F1PTS8	A4FV94_BOVINKRT6A OS=Bos taurus GN=KRT6A PE=2 SV=1	F	GO:0005198	structural molecule activity
J9P6T6	L8HQK3_9CETAMeiosis expressed 1 OS=Bos mutus GN=M91_17805 PE=4 SV=1	C	GO:0005634	nucleus
J9P6T6	L8HQK3_9CETAMeiosis expressed 1 OS=Bos mutus GN=M91_17805 PE=4 SV=1	P	GO:0044699	single-organism process
F1P8A6	G7Q2X0_MACFA Z39Ig OS=Macaca fascicularis GN=EGM_18851 PE=4 SV=1	C	GO:0016020	membrane
F1P8A6	G7Q2X0_MACFA Z39Ig OS=Macaca fascicularis GN=EGM_18851 PE=4 SV=1	F	GO:0005515	protein binding
J9NYN2	CSRP1_RATCysteine and glycine-rich 1 OS=Rattus norvegicus GN=Csrp1 PE=1 SV=2	C	GO:0043227	membrane-bounded organelle
J9NYN2	CSRP1_RATCysteine and glycine-rich 1 OS=Rattus norvegicus GN=Csrp1 PE=1 SV=2	F	GO:0008270	zinc ion binding
E2QSF4	G3HQP8_CRIGRTubulin beta chain OS=Cricetulus griseus GN=H671_1g3330 PE=3 SV=1	C	GO:0005874	microtubule
E2QSF4	G3HQP8_CRIGRTubulin beta chain OS=Cricetulus griseus GN=H671_1g3330 PE=3 SV=1	F	GO:0003924	GTPase activity
E2QSF4	G3HQP8_CRIGRTubulin beta chain OS=Cricetulus griseus GN=H671_1g3330 PE=3 SV=1	F	GO:0005200	structural constituent of cytoskeleton
E2QSF4	G3HQP8_CRIGRTubulin beta chain OS=Cricetulus griseus GN=H671_1g3330 PE=3 SV=1	F	GO:0005525	GTP binding
E2QSF4	G3HQP8_CRIGRTubulin beta chain OS=Cricetulus griseus GN=H671_1g3330 PE=3 SV=1	P	GO:0007017	microtubule-based process
Q0QEN2	L5KVR4_PTEALATP synthase subunit beta OS=Pteropus alecto GN=PAL_GLEAN10004833 PE=3 SV=1	C	GO:0033178	proton-transporting two-sector ATPase complex, catalytic domain
Q0QEN2	L5KVR4_PTEALATP synthase subunit beta OS=Pteropus alecto GN=PAL_GLEAN10004833 PE=3 SV=1	C	GO:0044429	mitochondrial part
Q0QEN2	L5KVR4_PTEALATP synthase subunit beta OS=Pteropus alecto GN=PAL_GLEAN10004833 PE=3 SV=1	F	GO:0005524	ATP binding
Q0QEN2	L5KVR4_PTEALATP synthase subunit beta OS=Pteropus alecto GN=PAL_GLEAN10004833 PE=3 SV=1	F	GO:0046933	proton-transporting ATP synthase activity, rotational mechanism
Q0QEN2	L5KVR4_PTEALATP synthase subunit beta OS=Pteropus alecto GN=PAL_GLEAN10004833 PE=3 SV=1	P	GO:0015986	ATP synthesis coupled proton transport
Q0QEN2	L5KVR4_PTEALATP synthase subunit beta OS=Pteropus alecto GN=PAL_GLEAN10004833 PE=3 SV=1	P	GO:0015991	ATP hydrolysis coupled proton transport
Q0QEN2	L5KVR4_PTEALATP synthase subunit beta OS=Pteropus alecto GN=PAL_GLEAN10004833 PE=3 SV=1	C	GO:0045259	proton-transporting ATP synthase complex
J9NZW6	L8I3W2_9CETAApolipo F (Fragment) OS=Bos mutus GN=M91_19740 PE=4 SV=1	C	GO:0016021	integral to membrane
F1P865	G9KNH0_MUSPFSideroflexin 4 (Fragment) OS=Mustela putorius furo GN=SFXN4 PE=2 SV=1	C	GO:0016020	membrane
F1P865	G9KNH0_MUSPFSideroflexin 4 (Fragment) OS=Mustela putorius furo GN=SFXN4 PE=2 SV=1	F	GO:0015075	ion transmembrane transporter activity
F1P865	G9KNH0_MUSPFSideroflexin 4 (Fragment) OS=Mustela putorius furo GN=SFXN4 PE=2 SV=1	P	GO:0006811	ion transport
F1P865	G9KNH0_MUSPFSideroflexin 4 (Fragment) OS=Mustela putorius furo GN=SFXN4 PE=2 SV=1	P	GO:0055085	transmembrane transport
F1PE38	U6CVL5_NEOVICadherin-13 OS=Neovison vison GN=CAD13 PE=2 SV=1	C	GO:0016020	membrane
F1PE38	U6CVL5_NEOVICadherin-13 OS=Neovison vison GN=CAD13 PE=2 SV=1	C	GO:0044464	cell part
F1PE38	U6CVL5_NEOVICadherin-13 OS=Neovison vison GN=CAD13 PE=2 SV=1	F	GO:0005509	calcium ion binding
F1PE38	U6CVL5_NEOVICadherin-13 OS=Neovison vison GN=CAD13 PE=2 SV=1	F	GO:0042803	protein homodimerization activity
F1PE38	U6CVL5_NEOVICadherin-13 OS=Neovison vison GN=CAD13 PE=2 SV=1	P	GO:0007156	homophilic cell adhesion
F1PE38	U6CVL5_NEOVICadherin-13 OS=Neovison vison GN=CAD13 PE=2 SV=1	P	GO:0044763	single-organism cellular process
F1PE38	U6CVL5_NEOVICadherin-13 OS=Neovison vison GN=CAD13 PE=2 SV=1	P	GO:0048522	positive regulation of cellular process
E2QW34	M3YTX0_MUSPFProteasome subunit beta type OS=Mustela putorius furo GN=PSMB2 PE=3 SV=1	C	GO:0005839	proteasome core complex
E2QW34	M3YTX0_MUSPFProteasome subunit beta type OS=Mustela putorius furo GN=PSMB2 PE=3 SV=1	F	GO:0004298	threonine-type endopeptidase activity
E2QW34	M3YTX0_MUSPFProteasome subunit beta type OS=Mustela putorius furo GN=PSMB2 PE=3 SV=1	P	GO:0051603	proteolysis involved in cellular protein catabolic process
E2R5H4	G5BBQ5_HETGAIntegrin-linked kinase OS=Heterocephalus glaber GN=ILK PE=4 SV=1	F	GO:0004672	protein kinase activity
E2R5H4	G5BBQ5_HETGAIntegrin-linked kinase OS=Heterocephalus glaber GN=ILK PE=4 SV=1	F	GO:0005515	protein binding
E2R5H4	G5BBQ5_HETGAIntegrin-linked kinase OS=Heterocephalus glaber GN=ILK PE=4 SV=1	F	GO:0005524	ATP binding
E2R5H4	G5BBQ5_HETGAIntegrin-linked kinase OS=Heterocephalus glaber GN=ILK PE=4 SV=1	P	GO:0006468	protein phosphorylation
E2R5H4	G5BBQ5_HETGAIntegrin-linked kinase OS=Heterocephalus glaber GN=ILK PE=4 SV=1	P	GO:0044763	single-organism cellular process
E2R5H4	G5BBQ5_HETGAIntegrin-linked kinase OS=Heterocephalus glaber GN=ILK PE=4 SV=1	P	GO:0048522	positive regulation of cellular process
E2R5H4	G5BBQ5_HETGAIntegrin-linked kinase OS=Heterocephalus glaber GN=ILK PE=4 SV=1	P	GO:0048731	system development
J9P716	B5LX42_FELCATubulin beta chain OS=Felis catus PE=2 SV=1	C	GO:0005874	microtubule
J9P716	B5LX42_FELCATubulin beta chain OS=Felis catus PE=2 SV=1	F	GO:0003924	GTPase activity
J9P716	B5LX42_FELCATubulin beta chain OS=Felis catus PE=2 SV=1	F	GO:0005200	structural constituent of cytoskeleton
J9P716	B5LX42_FELCATubulin beta chain OS=Felis catus PE=2 SV=1	F	GO:0005525	GTP binding
J9P716	B5LX42_FELCATubulin beta chain OS=Felis catus PE=2 SV=1	P	GO:0007017	microtubule-based process
J9PB81	A0A061IJ91_CRIGRCathepsin G OS=Cricetulus griseus GN=H671_1g4192 PE=3 SV=1	C	GO:0005737	cytoplasm
J9PB81	A0A061IJ91_CRIGRCathepsin G OS=Cricetulus griseus GN=H671_1g4192 PE=3 SV=1	C	GO:0043231	intracellular membrane-bounded organelle
J9PB81	A0A061IJ91_CRIGRCathepsin G OS=Cricetulus griseus GN=H671_1g4192 PE=3 SV=1	F	GO:0004252	serine-type endopeptidase activity
J9PB81	A0A061IJ91_CRIGRCathepsin G OS=Cricetulus griseus GN=H671_1g4192 PE=3 SV=1	P	GO:0002376	immune system process
J9PB81	A0A061IJ91_CRIGRCathepsin G OS=Cricetulus griseus GN=H671_1g4192 PE=3 SV=1	P	GO:0006508	proteolysis
J9PB81	A0A061IJ91_CRIGRCathepsin G OS=Cricetulus griseus GN=H671_1g4192 PE=3 SV=1	P	GO:0051707	response to other organism
E2RIG8	Q6NXZ5_MOUSEADP-ribosylation factor-like 5B OS=Mus musculus GN=Arl5b PE=1 SV=1	C	GO:0005622	intracellular
E2RIG8	Q6NXZ5_MOUSEADP-ribosylation factor-like 5B OS=Mus musculus GN=Arl5b PE=1 SV=1	F	GO:0005525	GTP binding
E2RIG8	Q6NXZ5_MOUSEADP-ribosylation factor-like 5B OS=Mus musculus GN=Arl5b PE=1 SV=1	P	GO:0007264	small GTPase mediated signal transduction
F1PPB6	H2Q5J5_PANTRDeoxyribose-phosphate aldolase ( ) OS=Pan troglodytes GN=DERA PE=2 SV=1	C	GO:0005737	cytoplasm
F1PPB6	H2Q5J5_PANTRDeoxyribose-phosphate aldolase ( ) OS=Pan troglodytes GN=DERA PE=2 SV=1	F	GO:0004139	deoxyribose-phosphate aldolase activity
F1PPB6	H2Q5J5_PANTRDeoxyribose-phosphate aldolase ( ) OS=Pan troglodytes GN=DERA PE=2 SV=1	P	GO:0009264	deoxyribonucleotide catabolic process
F1PPB6	H2Q5J5_PANTRDeoxyribose-phosphate aldolase ( ) OS=Pan troglodytes GN=DERA PE=2 SV=1	P	GO:0006098	pentose-phosphate shunt
F6X870	F6X870_CANLFUncharacterized protein OS=Canis lupus familiaris GN=PAM PE=4 SV=1	C	GO:0016020	membrane
F6X870	F6X870_CANLFUncharacterized protein OS=Canis lupus familiaris GN=PAM PE=4 SV=1	F	GO:0005515	protein binding
F6X870	F6X870_CANLFUncharacterized protein OS=Canis lupus familiaris GN=PAM PE=4 SV=1	F	GO:0016715	oxidoreductase activity, acting on paired donors, with incorporation or reduction of molecular oxygen, reduced ascorbate as one donor, and incorporation of one atom of oxygen
F6X870	F6X870_CANLFUncharacterized protein OS=Canis lupus familiaris GN=PAM PE=4 SV=1	P	GO:0006518	peptide metabolic process
F6X870	F6X870_CANLFUncharacterized protein OS=Canis lupus familiaris GN=PAM PE=4 SV=1	P	GO:0055114	oxidation-reduction process
E2RI13	GPBP1_BOVINVasculin OS=Bos taurus GN=GPBP1 PE=2 SV=1	C	GO:0005634	nucleus
E2RI13	GPBP1_BOVINVasculin OS=Bos taurus GN=GPBP1 PE=2 SV=1	F	GO:0003700	sequence-specific DNA binding transcription factor activity
E2RI13	GPBP1_BOVINVasculin OS=Bos taurus GN=GPBP1 PE=2 SV=1	P	GO:0045893	positive regulation of transcription, DNA-dependent
E2RI13	GPBP1_BOVINVasculin OS=Bos taurus GN=GPBP1 PE=2 SV=1	C	GO:0005667	transcription factor complex
E2RI13	GPBP1_BOVINVasculin OS=Bos taurus GN=GPBP1 PE=2 SV=1	P	GO:0045449	regulation of transcription, DNA-dependent
F1PGC3	K9K225_HORSEInterferon-induced wit tetratricopeptide repeats 2 OS=Equus caballus PE=2 SV=1	F	GO:0003723	RNA binding
F1PGC3	K9K225_HORSEInterferon-induced wit tetratricopeptide repeats 2 OS=Equus caballus PE=2 SV=1	F	GO:0005515	protein binding
F1PGC3	K9K225_HORSEInterferon-induced wit tetratricopeptide repeats 2 OS=Equus caballus PE=2 SV=1	P	GO:0009615	response to virus
F1PGC3	K9K225_HORSEInterferon-induced wit tetratricopeptide repeats 2 OS=Equus caballus PE=2 SV=1	P	GO:0035457	cellular response to interferon-alpha
E2RP87	M1EQN2_MUSPFFc of low affinity receptor (Fragment) OS=Mustela putorius furo PE=2 SV=1	C	GO:0016020	membrane
E2RP87	M1EQN2_MUSPFFc of low affinity receptor (Fragment) OS=Mustela putorius furo PE=2 SV=1	F	GO:0005515	protein binding
F5XVB0	F5XVB0_CANLFvon Willebrand factor OS=Canis lupus familiaris GN=VWF PE=2 SV=1	C	GO:0005578	proteinaceous extracellular matrix
F5XVB0	F5XVB0_CANLFvon Willebrand factor OS=Canis lupus familiaris GN=VWF PE=2 SV=1	C	GO:0043227	membrane-bounded organelle
F5XVB0	F5XVB0_CANLFvon Willebrand factor OS=Canis lupus familiaris GN=VWF PE=2 SV=1	F	GO:0032403	protein complex binding
F5XVB0	F5XVB0_CANLFvon Willebrand factor OS=Canis lupus familiaris GN=VWF PE=2 SV=1	P	GO:0007155	cell adhesion
F5XVB0	F5XVB0_CANLFvon Willebrand factor OS=Canis lupus familiaris GN=VWF PE=2 SV=1	P	GO:0007596	blood coagulation
P52784	G1K296_CANLFATP-dependent 6-phosphofructokinase OS=Canis lupus familiaris GN=PFKM PE=2 SV=1	F	GO:0003872	6-phosphofructokinase activity
P52784	G1K296_CANLFATP-dependent 6-phosphofructokinase OS=Canis lupus familiaris GN=PFKM PE=2 SV=1	F	GO:0005515	protein binding
P52784	G1K296_CANLFATP-dependent 6-phosphofructokinase OS=Canis lupus familiaris GN=PFKM PE=2 SV=1	F	GO:0005524	ATP binding
P52784	G1K296_CANLFATP-dependent 6-phosphofructokinase OS=Canis lupus familiaris GN=PFKM PE=2 SV=1	P	GO:0006002	fructose 6-phosphate metabolic process
P52784	G1K296_CANLFATP-dependent 6-phosphofructokinase OS=Canis lupus familiaris GN=PFKM PE=2 SV=1	P	GO:0006096	glycolysis
P52784	G1K296_CANLFATP-dependent 6-phosphofructokinase OS=Canis lupus familiaris GN=PFKM PE=2 SV=1	C	GO:0005945	6-phosphofructokinase complex
P52784	G1K296_CANLFATP-dependent 6-phosphofructokinase OS=Canis lupus familiaris GN=PFKM PE=2 SV=1	P	GO:0006000	fructose metabolic process
P52784	G1K296_CANLFATP-dependent 6-phosphofructokinase OS=Canis lupus familiaris GN=PFKM PE=2 SV=1	P	GO:0006012	galactose metabolic process
P52784	G1K296_CANLFATP-dependent 6-phosphofructokinase OS=Canis lupus familiaris GN=PFKM PE=2 SV=1	P	GO:0006013	mannose metabolic process
P52784	G1K296_CANLFATP-dependent 6-phosphofructokinase OS=Canis lupus familiaris GN=PFKM PE=2 SV=1	P	GO:0006094	gluconeogenesis
P52784	G1K296_CANLFATP-dependent 6-phosphofructokinase OS=Canis lupus familiaris GN=PFKM PE=2 SV=1	P	GO:0006098	pentose-phosphate shunt
F1PF31	Q4LE33_HUMANTNC variant (Fragment) OS=Homo sapiens GN=TNC variant PE=2 SV=1	C	GO:0031012	extracellular matrix
F1PF31	Q4LE33_HUMANTNC variant (Fragment) OS=Homo sapiens GN=TNC variant PE=2 SV=1	F	GO:0005515	protein binding
F1PF31	Q4LE33_HUMANTNC variant (Fragment) OS=Homo sapiens GN=TNC variant PE=2 SV=1	P	GO:0007155	cell adhesion
F1PF31	Q4LE33_HUMANTNC variant (Fragment) OS=Homo sapiens GN=TNC variant PE=2 SV=1	P	GO:0042127	regulation of cell proliferation
J9NU17	MYO1A_HUMANUnconventional myosin-Ia OS=Homo sapiens GN=MYO1A PE=2 SV=1	C	GO:0005902	microvillus
J9NU17	MYO1A_HUMANUnconventional myosin-Ia OS=Homo sapiens GN=MYO1A PE=2 SV=1	C	GO:0005903	brush border
J9NU17	MYO1A_HUMANUnconventional myosin-Ia OS=Homo sapiens GN=MYO1A PE=2 SV=1	C	GO:0016323	basolateral plasma membrane
J9NU17	MYO1A_HUMANUnconventional myosin-Ia OS=Homo sapiens GN=MYO1A PE=2 SV=1	C	GO:0016328	lateral plasma membrane
J9NU17	MYO1A_HUMANUnconventional myosin-Ia OS=Homo sapiens GN=MYO1A PE=2 SV=1	C	GO:0016459	myosin complex
J9NU17	MYO1A_HUMANUnconventional myosin-Ia OS=Homo sapiens GN=MYO1A PE=2 SV=1	C	GO:0030864	cortical actin cytoskeleton
J9NU17	MYO1A_HUMANUnconventional myosin-Ia OS=Homo sapiens GN=MYO1A PE=2 SV=1	C	GO:0031941	filamentous actin
J9NU17	MYO1A_HUMANUnconventional myosin-Ia OS=Homo sapiens GN=MYO1A PE=2 SV=1	F	GO:0003774	motor activity
J9NU17	MYO1A_HUMANUnconventional myosin-Ia OS=Homo sapiens GN=MYO1A PE=2 SV=1	F	GO:0005515	protein binding
J9NU17	MYO1A_HUMANUnconventional myosin-Ia OS=Homo sapiens GN=MYO1A PE=2 SV=1	F	GO:0005524	ATP binding
J9NU17	MYO1A_HUMANUnconventional myosin-Ia OS=Homo sapiens GN=MYO1A PE=2 SV=1	P	GO:0007605	sensory perception of sound
J9NU17	MYO1A_HUMANUnconventional myosin-Ia OS=Homo sapiens GN=MYO1A PE=2 SV=1	P	GO:0051648	vesicle localization
E2RH23	K7C1M7_PANTRBromodomain and PHD finger 1 OS=Pan troglodytes GN=BRPF1 PE=2 SV=1	C	GO:0005634	nucleus
E2RH23	K7C1M7_PANTRBromodomain and PHD finger 1 OS=Pan troglodytes GN=BRPF1 PE=2 SV=1	F	GO:0005515	protein binding
E2RH23	K7C1M7_PANTRBromodomain and PHD finger 1 OS=Pan troglodytes GN=BRPF1 PE=2 SV=1	F	GO:0008270	zinc ion binding
E2RI99	E2RI99_CANLFSignal transducer and activator of transcription OS=Canis lupus familiaris GN=STAT1 PE=3 SV=2	C	GO:0031981	nuclear lumen
E2RI99	E2RI99_CANLFSignal transducer and activator of transcription OS=Canis lupus familiaris GN=STAT1 PE=3 SV=2	F	GO:0003677	DNA binding
E2RI99	E2RI99_CANLFSignal transducer and activator of transcription OS=Canis lupus familiaris GN=STAT1 PE=3 SV=2	F	GO:0003700	sequence-specific DNA binding transcription factor activity
E2RI99	E2RI99_CANLFSignal transducer and activator of transcription OS=Canis lupus familiaris GN=STAT1 PE=3 SV=2	F	GO:0004871	signal transducer activity
E2RI99	E2RI99_CANLFSignal transducer and activator of transcription OS=Canis lupus familiaris GN=STAT1 PE=3 SV=2	P	GO:0006355	regulation of transcription, DNA-dependent
E2RI99	E2RI99_CANLFSignal transducer and activator of transcription OS=Canis lupus familiaris GN=STAT1 PE=3 SV=2	P	GO:0007165	signal transduction
E2RI99	E2RI99_CANLFSignal transducer and activator of transcription OS=Canis lupus familiaris GN=STAT1 PE=3 SV=2	P	GO:0009888	tissue development
E2RI99	E2RI99_CANLFSignal transducer and activator of transcription OS=Canis lupus familiaris GN=STAT1 PE=3 SV=2	P	GO:0010243	response to organonitrogen compound
E2RI99	E2RI99_CANLFSignal transducer and activator of transcription OS=Canis lupus familiaris GN=STAT1 PE=3 SV=2	P	GO:0010604	positive regulation of macromolecule metabolic process
E2RI99	E2RI99_CANLFSignal transducer and activator of transcription OS=Canis lupus familiaris GN=STAT1 PE=3 SV=2	P	GO:0031325	positive regulation of cellular metabolic process
E2RI99	E2RI99_CANLFSignal transducer and activator of transcription OS=Canis lupus familiaris GN=STAT1 PE=3 SV=2	P	GO:0042127	regulation of cell proliferation
E2RI99	E2RI99_CANLFSignal transducer and activator of transcription OS=Canis lupus familiaris GN=STAT1 PE=3 SV=2	P	GO:0048523	negative regulation of cellular process
E2RI99	E2RI99_CANLFSignal transducer and activator of transcription OS=Canis lupus familiaris GN=STAT1 PE=3 SV=2	P	GO:0071345	cellular response to cytokine stimulus
E2RI99	E2RI99_CANLFSignal transducer and activator of transcription OS=Canis lupus familiaris GN=STAT1 PE=3 SV=2	P	GO:0072001	renal system development
E2RI99	E2RI99_CANLFSignal transducer and activator of transcription OS=Canis lupus familiaris GN=STAT1 PE=3 SV=2	P	GO:1901700	response to oxygen-containing compound
E2RI99	E2RI99_CANLFSignal transducer and activator of transcription OS=Canis lupus familiaris GN=STAT1 PE=3 SV=2	C	GO:0005667	transcription factor complex
E2RI99	E2RI99_CANLFSignal transducer and activator of transcription OS=Canis lupus familiaris GN=STAT1 PE=3 SV=2	P	GO:0045449	regulation of transcription, DNA-dependent
J9NTJ3	J9NTJ3_CANLFUncharacterized protein OS=Canis lupus familiaris GN=MTCL1 PE=4 SV=1	C	GO:0016327	apicolateral plasma membrane
J9NTJ3	J9NTJ3_CANLFUncharacterized protein OS=Canis lupus familiaris GN=MTCL1 PE=4 SV=1	C	GO:0016328	lateral plasma membrane
J9NTJ3	J9NTJ3_CANLFUncharacterized protein OS=Canis lupus familiaris GN=MTCL1 PE=4 SV=1	C	GO:0097427	microtubule bundle
J9NTJ3	J9NTJ3_CANLFUncharacterized protein OS=Canis lupus familiaris GN=MTCL1 PE=4 SV=1	F	GO:0008017	microtubule binding
J9NTJ3	J9NTJ3_CANLFUncharacterized protein OS=Canis lupus familiaris GN=MTCL1 PE=4 SV=1	P	GO:0001578	microtubule bundle formation
J9NTJ3	J9NTJ3_CANLFUncharacterized protein OS=Canis lupus familiaris GN=MTCL1 PE=4 SV=1	P	GO:0045197	establishment or maintenance of epithelial cell apical/basal polarity
J9NTJ3	J9NTJ3_CANLFUncharacterized protein OS=Canis lupus familiaris GN=MTCL1 PE=4 SV=1	P	GO:0065007	biological regulation
J9NTJ3	J9NTJ3_CANLFUncharacterized protein OS=Canis lupus familiaris GN=MTCL1 PE=4 SV=1	C	GO:0045298	tubulin complex
F1Q432	TENX_HUMANTenascin-X OS=Homo sapiens GN=TNXB PE=1 SV=4	C	GO:0005578	proteinaceous extracellular matrix
F1Q432	TENX_HUMANTenascin-X OS=Homo sapiens GN=TNXB PE=1 SV=4	F	GO:0005515	protein binding
F1Q432	TENX_HUMANTenascin-X OS=Homo sapiens GN=TNXB PE=1 SV=4	P	GO:0030199	collagen fibril organization
F1Q432	TENX_HUMANTenascin-X OS=Homo sapiens GN=TNXB PE=1 SV=4	P	GO:0044710	single-organism metabolic process
F1Q432	TENX_HUMANTenascin-X OS=Homo sapiens GN=TNXB PE=1 SV=4	P	GO:0071704	organic substance metabolic process
F1Q0C1	K7D550_PANTRDopey family member 1 OS=Pan troglodytes GN=DOPEY1 PE=2 SV=1	P	GO:0015031	protein transport
F1PN38	L5KSA9_PTEALBaculoviral IAP repeat-containing 6 OS=Pteropus alecto GN=PAL_GLEAN10020317 PE=4 SV=1	C	GO:0005737	cytoplasm
F1PN38	L5KSA9_PTEALBaculoviral IAP repeat-containing 6 OS=Pteropus alecto GN=PAL_GLEAN10020317 PE=4 SV=1	C	GO:0043229	intracellular organelle
F1PN38	L5KSA9_PTEALBaculoviral IAP repeat-containing 6 OS=Pteropus alecto GN=PAL_GLEAN10020317 PE=4 SV=1	F	GO:0004842	ubiquitin-protein ligase activity
F1PN38	L5KSA9_PTEALBaculoviral IAP repeat-containing 6 OS=Pteropus alecto GN=PAL_GLEAN10020317 PE=4 SV=1	F	GO:0005515	protein binding
F1PN38	L5KSA9_PTEALBaculoviral IAP repeat-containing 6 OS=Pteropus alecto GN=PAL_GLEAN10020317 PE=4 SV=1	P	GO:0006915	apoptotic process
F1PN38	L5KSA9_PTEALBaculoviral IAP repeat-containing 6 OS=Pteropus alecto GN=PAL_GLEAN10020317 PE=4 SV=1	P	GO:0009966	regulation of signal transduction
F1PN38	L5KSA9_PTEALBaculoviral IAP repeat-containing 6 OS=Pteropus alecto GN=PAL_GLEAN10020317 PE=4 SV=1	P	GO:0032465	regulation of cytokinesis
F1PN38	L5KSA9_PTEALBaculoviral IAP repeat-containing 6 OS=Pteropus alecto GN=PAL_GLEAN10020317 PE=4 SV=1	P	GO:0016567	protein ubiquitination

## Sheet: bp
Level	GO ID	Term	GO Type	#Seqs	Sequence Names
1	GO:0008150	biological_process	Biological Process	43	E2RI99, E2RI13, J9NVE9, F1PN38, F1Q432, J9JHZ3, F1PBL4, F1PE38, J9NTJ3, J9NU17, J9JHF7, F1PPB6, F1PDY8, J9PB81, F1P8G0, F1P9M6, F1P865, J9NVT1, E2RQF8, F5XVB0, P52784, F1PCG4, F1PBI6, P60529, F1PBK6, Q9MZD3, F1PGS2, C0LQL0, E2RIG8, E2QW34, J9P0D4, J9NWQ5, F1Q0C1, J9P716, F1PF31, Q0QEN2, J9P6T6, E2QSF4, F1PGC3, E2R5H4, F1P8V6, F6X870, P60524
2	GO:0040011	locomotion	Biological Process	1	F1PBI6
2	GO:0051704	multi-organism process	Biological Process	4	Q9MZD3, J9PB81, F1PGC3, F1PGS2
2	GO:0048519	negative regulation of biological process	Biological Process	4	F1PBI6, E2RI99, J9NVE9, F1PGS2
2	GO:0044699	single-organism process	Biological Process	32	E2RI99, F1PN38, J9NVE9, F1Q432, J9JHZ3, F1PBL4, F1PE38, J9NTJ3, J9JHF7, F1PPB6, F1PDY8, F1P8G0, J9NVT1, E2RQF8, F5XVB0, P52784, F1PCG4, F1PBI6, P60529, F1PBK6, F1PGS2, C0LQL0, E2RIG8, J9P716, F1PF31, Q0QEN2, E2QSF4, J9P6T6, E2R5H4, F1P8V6, F6X870, P60524
2	GO:0022610	biological adhesion	Biological Process	5	F1PBI6, F1PF31, F1PGS2, F5XVB0, F1PE38
2	GO:0032502	developmental process	Biological Process	4	F1PBI6, E2RI99, E2R5H4, J9NVT1
2	GO:0048518	positive regulation of biological process	Biological Process	11	F1PBI6, E2RI99, E2RI13, J9NVE9, F1PDY8, F1P8G0, E2R5H4, F1PGS2, C0LQL0, F1PBL4, F1PE38
2	GO:0050896	response to stimulus	Biological Process	15	F1PCG4, F1PBI6, E2RI99, J9NVE9, F1PN38, F1PGS2, C0LQL0, F1PBL4, E2RIG8, F1PDY8, J9PB81, F1P8G0, F1PGC3, E2RQF8, F5XVB0
2	GO:0051179	localization	Biological Process	11	F1PBI6, P60529, J9NU17, J9JHF7, F1Q0C1, Q0QEN2, F1P865, F1P8V6, F1PGS2, J9JHZ3, P60524
2	GO:0098754	detoxification	Biological Process	1	F1PCG4
2	GO:0008152	metabolic process	Biological Process	17	P52784, F1PCG4, F1PBI6, E2RI99, F1PBK6, E2RI13, Q9MZD3, J9NVE9, F1PN38, F1Q432, F1PGS2, E2QW34, F1PPB6, Q0QEN2, J9PB81, E2R5H4, F6X870
2	GO:0071840	cellular component organization or biogenesis	Biological Process	6	J9NTJ3, F1PBI6, F1P8G0, F1Q432, F1PGS2, F1PBL4
2	GO:0032501	multicellular organismal process	Biological Process	9	F1PBI6, E2RI99, J9NU17, F1P8G0, E2R5H4, F1PGS2, J9NVT1, F5XVB0, F1PBL4
2	GO:0002376	immune system process	Biological Process	6	F1PBI6, J9P0D4, J9PB81, F1P9M6, C0LQL0, F1PGS2
2	GO:0022414	reproductive process	Biological Process	1	J9NVT1
2	GO:0050789	regulation of biological process	Biological Process	18	F1PCG4, F1PBI6, E2RI99, E2RI13, Q9MZD3, J9NVE9, F1PN38, F1PGS2, C0LQL0, F1PBL4, F1PE38, E2RIG8, J9NWQ5, F1PF31, F1PDY8, F1P8G0, E2R5H4, E2RQF8
2	GO:0000003	reproduction	Biological Process	1	J9NVT1
2	GO:0009987	cellular process	Biological Process	30	E2RI99, E2RI13, F1PN38, J9NVE9, F1Q432, F1PBL4, F1PE38, J9NTJ3, F1PPB6, F1PDY8, F1P8G0, J9NVT1, E2RQF8, P52784, F1PCG4, F1PBI6, F1PBK6, Q9MZD3, F1PGS2, C0LQL0, E2RIG8, E2QW34, J9NWQ5, J9P716, F1PF31, Q0QEN2, E2QSF4, F1PGC3, E2R5H4, F6X870
2	GO:0065007	biological regulation	Biological Process	20	F1PCG4, F1PBI6, E2RI99, E2RI13, Q9MZD3, J9NVE9, F1PN38, F1PGS2, C0LQL0, F1PBL4, F1PE38, E2RIG8, J9NTJ3, J9NWQ5, F1PF31, F1PDY8, F1P8G0, E2R5H4, E2RQF8, F5XVB0
2	GO:0023052	signaling	Biological Process	10	E2RIG8, F1PBI6, E2RI99, J9NVE9, F1PN38, F1P8G0, F1PGS2, C0LQL0, E2RQF8, F1PBL4
3	GO:0051674	localization of cell	Biological Process	1	F1PBI6
3	GO:0044767	single-organism developmental process	Biological Process	4	F1PBI6, E2RI99, E2R5H4, J9NVT1
3	GO:0065008	regulation of biological quality	Biological Process	6	F1PCG4, F1PBI6, F1P8G0, F1PGS2, F5XVB0, F1PBL4
3	GO:1902578	single-organism localization	Biological Process	8	F1PBI6, P60529, J9JHF7, Q0QEN2, F1P8V6, F1PGS2, J9JHZ3, P60524
3	GO:0032879	regulation of localization	Biological Process	2	F1PBI6, F1PGS2
3	GO:0051239	regulation of multicellular organismal process	Biological Process	2	F1PBI6, F1PGS2
3	GO:0050794	regulation of cellular process	Biological Process	18	F1PCG4, F1PBI6, E2RI99, E2RI13, Q9MZD3, J9NVE9, F1PN38, F1PGS2, C0LQL0, F1PBL4, F1PE38, E2RIG8, J9NWQ5, F1PF31, F1PDY8, F1P8G0, E2R5H4, E2RQF8
3	GO:0050793	regulation of developmental process	Biological Process	1	F1PBI6
3	GO:0044763	single-organism cellular process	Biological Process	23	P52784, F1PCG4, F1PBI6, E2RI99, F1PBK6, F1PN38, J9NVE9, F1Q432, F1PGS2, C0LQL0, F1PBL4, F1PE38, J9NTJ3, E2RIG8, F1PPB6, J9P716, Q0QEN2, F1PDY8, F1P8G0, E2QSF4, E2R5H4, J9NVT1, E2RQF8
3	GO:0044764	multi-organism cellular process	Biological Process	2	Q9MZD3, F1PGC3
3	GO:1904951	positive regulation of establishment of protein localization	Biological Process	1	F1PGS2
3	GO:0071704	organic substance metabolic process	Biological Process	15	P52784, F1PBI6, E2RI99, E2RI13, Q9MZD3, J9NVE9, F1PN38, F1Q432, F1PGS2, E2QW34, F1PPB6, Q0QEN2, J9PB81, E2R5H4, F6X870
3	GO:0002684	positive regulation of immune system process	Biological Process	1	F1PBI6
3	GO:0040017	positive regulation of locomotion	Biological Process	1	F1PBI6
3	GO:0044237	cellular metabolic process	Biological Process	15	P52784, F1PCG4, F1PBI6, E2RI99, F1PBK6, E2RI13, Q9MZD3, J9NVE9, F1PN38, F1PGS2, E2QW34, F1PPB6, Q0QEN2, E2R5H4, F6X870
3	GO:0051240	positive regulation of multicellular organismal process	Biological Process	2	F1PBI6, F1PGS2
3	GO:0048523	negative regulation of cellular process	Biological Process	4	F1PBI6, E2RI99, J9NVE9, F1PGS2
3	GO:0042330	taxis	Biological Process	1	F1PBI6
3	GO:0048584	positive regulation of response to stimulus	Biological Process	3	F1PBI6, J9NVE9, F1PGS2
3	GO:0009605	response to external stimulus	Biological Process	5	F1PBI6, J9PB81, F1PGC3, F1PGS2, C0LQL0
3	GO:0023057	negative regulation of signaling	Biological Process	2	F1PBI6, F1PGS2
3	GO:0045321	leukocyte activation	Biological Process	1	F1PBI6
3	GO:0002683	negative regulation of immune system process	Biological Process	1	F1PBI6
3	GO:1900047	negative regulation of hemostasis	Biological Process	2	F1PBI6, F1PGS2
3	GO:1990748	cellular detoxification	Biological Process	1	F1PCG4
3	GO:0040013	negative regulation of locomotion	Biological Process	1	F1PBI6
3	GO:0051707	response to other organism	Biological Process	3	J9PB81, F1PGC3, F1PGS2
3	GO:0040012	regulation of locomotion	Biological Process	1	F1PBI6
3	GO:0044710	single-organism metabolic process	Biological Process	10	P52784, F1PCG4, F1PBI6, F1PBK6, F1PPB6, Q0QEN2, J9NVE9, F1Q432, F1PGS2, F6X870
3	GO:0022402	cell cycle process	Biological Process	2	F1PBI6, F1PN38
3	GO:0009653	anatomical structure morphogenesis	Biological Process	1	F1PBI6
3	GO:0048585	negative regulation of response to stimulus	Biological Process	2	F1PBI6, F1PGS2
3	GO:0072376	protein activation cascade	Biological Process	1	F1PGS2
3	GO:0009058	biosynthetic process	Biological Process	6	P52784, F1PBI6, E2RI99, E2RI13, J9NVE9, Q0QEN2
3	GO:0044700	single organism signaling	Biological Process	10	E2RIG8, F1PBI6, E2RI99, J9NVE9, F1PN38, F1P8G0, F1PGS2, C0LQL0, E2RQF8, F1PBL4
3	GO:0051050	positive regulation of transport	Biological Process	1	F1PGS2
3	GO:0048646	anatomical structure formation involved in morphogenesis	Biological Process	1	F1PBI6
3	GO:0043900	regulation of multi-organism process	Biological Process	1	Q9MZD3
3	GO:0051918	negative regulation of fibrinolysis	Biological Process	1	F1PBI6
3	GO:0019222	regulation of metabolic process	Biological Process	5	E2RI99, F1PBI6, E2RI13, J9NVE9, F1PGS2
3	GO:0045785	positive regulation of cell adhesion	Biological Process	1	F1PGS2
3	GO:0044419	interspecies interaction between organisms	Biological Process	2	Q9MZD3, F1PGC3
3	GO:0009893	positive regulation of metabolic process	Biological Process	5	F1PBI6, E2RI99, E2RI13, J9NVE9, F1PGS2
3	GO:0009056	catabolic process	Biological Process	4	P52784, E2QW34, F1PPB6, J9NVE9
3	GO:0006950	response to stress	Biological Process	8	F1PCG4, F1PBI6, J9NVE9, F1P8G0, F1PGS2, C0LQL0, F5XVB0, F1PBL4
3	GO:0042221	response to chemical	Biological Process	7	F1PCG4, F1PBI6, E2RI99, F1PDY8, J9NVE9, F1PGC3, F1PGS2
3	GO:0044087	regulation of cellular component biogenesis	Biological Process	1	F1PBI6
3	GO:0006955	immune response	Biological Process	3	F1PBI6, C0LQL0, F1PGS2
3	GO:0023056	positive regulation of signaling	Biological Process	3	F1PBI6, J9NVE9, F1PGS2
3	GO:0006807	nitrogen compound metabolic process	Biological Process	9	P52784, F1PBI6, E2RI99, E2RI13, F1PBK6, F1PPB6, Q0QEN2, J9NVE9, F6X870
3	GO:0023051	regulation of signaling	Biological Process	4	F1PBI6, J9NVE9, F1PN38, F1PGS2
3	GO:0044707	single-multicellular organism process	Biological Process	8	F1PBI6, E2RI99, F1P8G0, E2R5H4, F1PGS2, J9NVT1, F5XVB0, F1PBL4
3	GO:1900046	regulation of hemostasis	Biological Process	2	F1PBI6, F1PGS2
3	GO:0033036	macromolecule localization	Biological Process	3	F1PBI6, F1Q0C1, F1PGS2
3	GO:0006457	protein folding	Biological Process	1	Q9MZD3
3	GO:0009607	response to biotic stimulus	Biological Process	3	J9PB81, F1PGC3, F1PGS2
3	GO:0048583	regulation of response to stimulus	Biological Process	5	F1PBI6, J9NVE9, F1PN38, F1PGS2, C0LQL0
3	GO:0016043	cellular component organization	Biological Process	6	J9NTJ3, F1PBI6, F1P8G0, F1Q432, F1PGS2, F1PBL4
3	GO:0009719	response to endogenous stimulus	Biological Process	2	F1PBI6, E2RI99
3	GO:0048870	cell motility	Biological Process	1	F1PBI6
3	GO:0044702	single organism reproductive process	Biological Process	1	J9NVT1
3	GO:0008283	cell proliferation	Biological Process	3	E2RI99, F1PBI6, F1PF31
3	GO:0002682	regulation of immune system process	Biological Process	1	F1PBI6
3	GO:0051093	negative regulation of developmental process	Biological Process	1	F1PBI6
3	GO:1900048	positive regulation of hemostasis	Biological Process	1	F1PBI6
3	GO:0051094	positive regulation of developmental process	Biological Process	1	F1PBI6
3	GO:0003008	system process	Biological Process	2	J9NU17, F1PGS2
3	GO:0051641	cellular localization	Biological Process	1	J9NU17
3	GO:0009892	negative regulation of metabolic process	Biological Process	2	F1PBI6, J9NVE9
3	GO:0019882	antigen processing and presentation	Biological Process	1	F1PBI6
3	GO:0051241	negative regulation of multicellular organismal process	Biological Process	2	F1PBI6, F1PGS2
3	GO:0065009	regulation of molecular function	Biological Process	1	F1PBI6
3	GO:0051051	negative regulation of transport	Biological Process	1	F1PBI6
3	GO:0048522	positive regulation of cellular process	Biological Process	9	F1PBI6, E2RI99, E2RI13, J9NVE9, F1P8G0, E2R5H4, F1PGS2, F1PBL4, F1PE38
3	GO:0044085	cellular component biogenesis	Biological Process	4	F1PBI6, F1P8G0, F1PGS2, F1PBL4
3	GO:0048856	anatomical structure development	Biological Process	4	E2RI99, F1PBI6, E2R5H4, J9NVT1
3	GO:0044238	primary metabolic process	Biological Process	13	P52784, F1PBI6, E2RI99, E2RI13, Q9MZD3, J9NVE9, F1PN38, F1PGS2, E2QW34, F1PPB6, Q0QEN2, J9PB81, E2R5H4
3	GO:0051234	establishment of localization	Biological Process	10	F1PBI6, P60529, J9JHF7, F1Q0C1, Q0QEN2, F1P865, F1P8V6, F1PGS2, J9JHZ3, P60524
3	GO:0098602	single organism cell adhesion	Biological Process	1	F1PGS2
3	GO:0051716	cellular response to stimulus	Biological Process	12	F1PCG4, F1PBI6, E2RI99, J9NVE9, F1PN38, F1PGS2, C0LQL0, F1PBL4, E2RIG8, F1P8G0, F1PGC3, E2RQF8
3	GO:0007155	cell adhesion	Biological Process	5	F1PBI6, F1PF31, F1PGS2, F5XVB0, F1PE38
3	GO:0030155	regulation of cell adhesion	Biological Process	2	F1PBI6, F1PGS2
4	GO:0051271	negative regulation of cellular component movement	Biological Process	1	F1PBI6
4	GO:0009617	response to bacterium	Biological Process	1	F1PGS2
4	GO:1901564	organonitrogen compound metabolic process	Biological Process	5	P52784, F1PBI6, F1PPB6, Q0QEN2, F6X870
4	GO:0006730	one-carbon metabolic process	Biological Process	1	F1PBK6
4	GO:0090130	tissue migration	Biological Process	1	F1PBI6
4	GO:0001568	blood vessel development	Biological Process	1	F1PBI6
4	GO:0001775	cell activation	Biological Process	4	F1PBI6, F1P8G0, F1PGS2, F1PBL4
4	GO:1903035	negative regulation of response to wounding	Biological Process	2	F1PBI6, F1PGS2
4	GO:0045184	establishment of protein localization	Biological Process	2	F1Q0C1, F1PGS2
4	GO:0006959	humoral immune response	Biological Process	1	F1PGS2
4	GO:0007267	cell-cell signaling	Biological Process	1	F1PGS2
4	GO:0043903	regulation of symbiosis, encompassing mutualism through parasitism	Biological Process	1	Q9MZD3
4	GO:2000145	regulation of cell motility	Biological Process	1	F1PBI6
4	GO:0002694	regulation of leukocyte activation	Biological Process	1	F1PBI6
4	GO:0009967	positive regulation of signal transduction	Biological Process	3	F1PBI6, J9NVE9, F1PGS2
4	GO:0055086	nucleobase-containing small molecule metabolic process	Biological Process	4	P52784, F1PBI6, F1PPB6, Q0QEN2
4	GO:0045087	innate immune response	Biological Process	1	C0LQL0
4	GO:1901657	glycosyl compound metabolic process	Biological Process	2	P52784, Q0QEN2
4	GO:0009725	response to hormone	Biological Process	1	F1PBI6
4	GO:0044249	cellular biosynthetic process	Biological Process	5	F1PBI6, E2RI99, E2RI13, J9NVE9, Q0QEN2
4	GO:0006082	organic acid metabolic process	Biological Process	1	P52784
4	GO:0071559	response to transforming growth factor beta	Biological Process	1	F1PBI6
4	GO:0051186	cofactor metabolic process	Biological Process	2	P52784, F1PPB6
4	GO:0006979	response to oxidative stress	Biological Process	1	F1PCG4
4	GO:0044711	single-organism biosynthetic process	Biological Process	2	P52784, Q0QEN2
4	GO:0002696	positive regulation of leukocyte activation	Biological Process	1	F1PBI6
4	GO:0032101	regulation of response to external stimulus	Biological Process	3	F1PBI6, F1PGS2, C0LQL0
4	GO:0010604	positive regulation of macromolecule metabolic process	Biological Process	5	F1PBI6, E2RI99, E2RI13, J9NVE9, F1PGS2
4	GO:0031323	regulation of cellular metabolic process	Biological Process	5	F1PBI6, E2RI99, E2RI13, J9NVE9, F1PGS2
4	GO:0072593	reactive oxygen species metabolic process	Biological Process	2	F1PCG4, F1PBI6
4	GO:0031325	positive regulation of cellular metabolic process	Biological Process	5	F1PBI6, E2RI99, E2RI13, J9NVE9, F1PGS2
4	GO:0034763	negative regulation of transmembrane transport	Biological Process	1	F1PBI6
4	GO:0002274	myeloid leukocyte activation	Biological Process	1	F1PBI6
4	GO:0042592	homeostatic process	Biological Process	1	F1PCG4
4	GO:0032880	regulation of protein localization	Biological Process	1	F1PGS2
4	GO:0019730	antimicrobial humoral response	Biological Process	1	F1PGS2
4	GO:0044057	regulation of system process	Biological Process	1	F1PGS2
4	GO:0010033	response to organic substance	Biological Process	3	E2RI99, F1PBI6, F1PGC3
4	GO:0009888	tissue development	Biological Process	1	E2RI99
4	GO:0009611	response to wounding	Biological Process	5	F1PBI6, F1P8G0, F1PGS2, F5XVB0, F1PBL4
4	GO:0010605	negative regulation of macromolecule metabolic process	Biological Process	2	F1PBI6, J9NVE9
4	GO:0010810	regulation of cell-substrate adhesion	Biological Process	1	F1PBI6
4	GO:0046887	positive regulation of hormone secretion	Biological Process	1	F1PGS2
4	GO:0010941	regulation of cell death	Biological Process	2	F1PBI6, F1PGS2
4	GO:0032940	secretion by cell	Biological Process	2	F1PBI6, F1PGS2
4	GO:0051222	positive regulation of protein transport	Biological Process	1	F1PGS2
4	GO:0050817	coagulation	Biological Process	5	F1PBI6, F1P8G0, F1PGS2, F5XVB0, F1PBL4
4	GO:0016477	cell migration	Biological Process	1	F1PBI6
4	GO:0007275	multicellular organism development	Biological Process	4	F1PBI6, E2RI99, E2R5H4, J9NVT1
4	GO:1901135	carbohydrate derivative metabolic process	Biological Process	4	P52784, F1PBI6, F1PPB6, Q0QEN2
4	GO:0098609	cell-cell adhesion	Biological Process	2	F1PGS2, F1PE38
4	GO:0045454	cell redox homeostasis	Biological Process	1	F1PCG4
4	GO:0090287	regulation of cellular response to growth factor stimulus	Biological Process	1	F1PBI6
4	GO:0070085	glycosylation	Biological Process	1	F1PBI6
4	GO:0043933	macromolecular complex subunit organization	Biological Process	4	F1P8G0, F1Q432, F1PGS2, F1PBL4
4	GO:0043062	extracellular structure organization	Biological Process	2	F1PBI6, F1Q432
4	GO:0051726	regulation of cell cycle	Biological Process	2	F1PBI6, F1PN38
4	GO:0007165	signal transduction	Biological Process	10	E2RIG8, F1PBI6, E2RI99, J9NVE9, F1PN38, F1P8G0, F1PGS2, C0LQL0, E2RQF8, F1PBL4
4	GO:0000910	cytokinesis	Biological Process	1	F1PN38
4	GO:0044712	single-organism catabolic process	Biological Process	3	P52784, F1PPB6, J9NVE9
4	GO:0019725	cellular homeostasis	Biological Process	1	F1PCG4
4	GO:0050818	regulation of coagulation	Biological Process	2	F1PBI6, F1PGS2
4	GO:0032891	negative regulation of organic acid transport	Biological Process	1	F1PBI6
4	GO:0071495	cellular response to endogenous stimulus	Biological Process	1	F1PBI6
4	GO:0044281	small molecule metabolic process	Biological Process	5	P52784, F1PBI6, F1PBK6, F1PPB6, Q0QEN2
4	GO:0009894	regulation of catabolic process	Biological Process	1	J9NVE9
4	GO:0051172	negative regulation of nitrogen compound metabolic process	Biological Process	1	J9NVE9
4	GO:0048513	animal organ development	Biological Process	1	J9NVT1
4	GO:2000026	regulation of multicellular organismal development	Biological Process	1	F1PBI6
4	GO:1904018	positive regulation of vasculature development	Biological Process	1	F1PBI6
4	GO:0022407	regulation of cell-cell adhesion	Biological Process	1	F1PGS2
4	GO:0006725	cellular aromatic compound metabolic process	Biological Process	7	P52784, F1PBI6, E2RI99, E2RI13, F1PPB6, J9NVE9, Q0QEN2
4	GO:1901576	organic substance biosynthetic process	Biological Process	6	P52784, F1PBI6, E2RI99, E2RI13, J9NVE9, Q0QEN2
4	GO:0016032	viral process	Biological Process	2	Q9MZD3, F1PGC3
4	GO:0007050	cell cycle arrest	Biological Process	1	F1PBI6
4	GO:0044255	cellular lipid metabolic process	Biological Process	1	J9NVE9
4	GO:0044092	negative regulation of molecular function	Biological Process	1	F1PBI6
4	GO:0007154	cell communication	Biological Process	10	E2RIG8, F1PBI6, E2RI99, J9NVE9, F1PN38, F1P8G0, F1PGS2, C0LQL0, E2RQF8, F1PBL4
4	GO:0002578	negative regulation of antigen processing and presentation	Biological Process	1	F1PBI6
4	GO:0044403	symbiosis, encompassing mutualism through parasitism	Biological Process	2	Q9MZD3, F1PGC3
4	GO:0010942	positive regulation of cell death	Biological Process	1	F1PBI6
4	GO:0050792	regulation of viral process	Biological Process	1	Q9MZD3
4	GO:0045834	positive regulation of lipid metabolic process	Biological Process	1	J9NVE9
4	GO:0051302	regulation of cell division	Biological Process	1	F1PN38
4	GO:0007049	cell cycle	Biological Process	2	F1PBI6, F1PN38
4	GO:0080090	regulation of primary metabolic process	Biological Process	5	F1PBI6, E2RI99, E2RI13, J9NVE9, F1PGS2
4	GO:0010647	positive regulation of cell communication	Biological Process	3	F1PBI6, J9NVE9, F1PGS2
4	GO:0006810	transport	Biological Process	10	F1PBI6, P60529, J9JHF7, F1Q0C1, Q0QEN2, F1P865, F1P8V6, F1PGS2, J9JHZ3, P60524
4	GO:0009966	regulation of signal transduction	Biological Process	4	F1PBI6, J9NVE9, F1PN38, F1PGS2
4	GO:0055114	oxidation-reduction process	Biological Process	2	F1PCG4, F6X870
4	GO:1901360	organic cyclic compound metabolic process	Biological Process	7	P52784, F1PBI6, E2RI99, E2RI13, F1PPB6, J9NVE9, Q0QEN2
4	GO:0060255	regulation of macromolecule metabolic process	Biological Process	5	F1PBI6, E2RI99, E2RI13, J9NVE9, F1PGS2
4	GO:0072378	blood coagulation, fibrin clot formation	Biological Process	1	F1PGS2
4	GO:0043170	macromolecule metabolic process	Biological Process	10	E2RI99, F1PBI6, E2QW34, E2RI13, Q9MZD3, J9NVE9, J9PB81, F1PN38, E2R5H4, F1PGS2
4	GO:0010633	negative regulation of epithelial cell migration	Biological Process	1	F1PBI6
4	GO:0010243	response to organonitrogen compound	Biological Process	1	E2RI99
4	GO:0070271	protein complex biogenesis	Biological Process	3	F1P8G0, F1PGS2, F1PBL4
4	GO:0010634	positive regulation of epithelial cell migration	Biological Process	1	F1PBI6
4	GO:0060548	negative regulation of cell death	Biological Process	2	F1PBI6, F1PGS2
4	GO:0046883	regulation of hormone secretion	Biological Process	1	F1PGS2
4	GO:0051173	positive regulation of nitrogen compound metabolic process	Biological Process	2	F1PBI6, E2RI13
4	GO:1903532	positive regulation of secretion by cell	Biological Process	1	F1PGS2
4	GO:0050921	positive regulation of chemotaxis	Biological Process	1	F1PBI6
4	GO:0022409	positive regulation of cell-cell adhesion	Biological Process	1	F1PGS2
4	GO:0009890	negative regulation of biosynthetic process	Biological Process	1	J9NVE9
4	GO:0010648	negative regulation of cell communication	Biological Process	2	F1PBI6, F1PGS2
4	GO:2000147	positive regulation of cell motility	Biological Process	1	F1PBI6
4	GO:0048731	system development	Biological Process	4	F1PBI6, E2RI99, E2R5H4, J9NVT1
4	GO:0050790	regulation of catalytic activity	Biological Process	1	F1PBI6
4	GO:0031324	negative regulation of cellular metabolic process	Biological Process	2	F1PBI6, J9NVE9
4	GO:0007163	establishment or maintenance of cell polarity	Biological Process	1	J9NTJ3
4	GO:0050920	regulation of chemotaxis	Biological Process	1	F1PBI6
4	GO:0006793	phosphorus metabolic process	Biological Process	7	P52784, F1PBI6, F1PPB6, Q0QEN2, J9NVE9, E2R5H4, F1PGS2
4	GO:0070887	cellular response to chemical stimulus	Biological Process	4	F1PCG4, E2RI99, F1PBI6, F1PGC3
4	GO:0006139	nucleobase-containing compound metabolic process	Biological Process	7	P52784, F1PBI6, E2RI99, E2RI13, F1PPB6, J9NVE9, Q0QEN2
4	GO:0006928	movement of cell or subcellular component	Biological Process	1	F1PBI6
4	GO:0051129	negative regulation of cellular component organization	Biological Process	1	F1PBI6
4	GO:0044093	positive regulation of molecular function	Biological Process	1	F1PBI6
4	GO:0019538	protein metabolic process	Biological Process	8	F1PBI6, E2QW34, Q9MZD3, J9NVE9, J9PB81, F1PN38, E2R5H4, F1PGS2
4	GO:0032102	negative regulation of response to external stimulus	Biological Process	2	F1PBI6, F1PGS2
4	GO:0051272	positive regulation of cellular component movement	Biological Process	1	F1PBI6
4	GO:0022603	regulation of anatomical structure morphogenesis	Biological Process	1	F1PBI6
4	GO:0001818	negative regulation of cytokine production	Biological Process	1	F1PBI6
4	GO:0044723	single-organism carbohydrate metabolic process	Biological Process	1	P52784
4	GO:0023014	signal transduction by protein phosphorylation	Biological Process	3	F1PBI6, J9NVE9, F1PGS2
4	GO:0006952	defense response	Biological Process	4	F1PBI6, J9NVE9, C0LQL0, F1PGS2
4	GO:0001525	angiogenesis	Biological Process	1	F1PBI6
4	GO:0010817	regulation of hormone levels	Biological Process	1	F1PGS2
4	GO:0006091	generation of precursor metabolites and energy	Biological Process	1	P52784
4	GO:0016337	single organismal cell-cell adhesion	Biological Process	1	F1PGS2
4	GO:0008285	negative regulation of cell proliferation	Biological Process	1	F1PBI6
4	GO:0010646	regulation of cell communication	Biological Process	4	F1PBI6, J9NVE9, F1PN38, F1PGS2
4	GO:0009968	negative regulation of signal transduction	Biological Process	2	F1PBI6, F1PGS2
4	GO:0034330	cell junction organization	Biological Process	1	F1PBI6
4	GO:0050877	neurological system process	Biological Process	1	J9NU17
4	GO:0071774	response to fibroblast growth factor	Biological Process	1	F1PBI6
4	GO:0030193	regulation of blood coagulation	Biological Process	2	F1PBI6, F1PGS2
4	GO:0051128	regulation of cellular component organization	Biological Process	1	F1PBI6
4	GO:0006629	lipid metabolic process	Biological Process	1	J9NVE9
4	GO:1901888	regulation of cell junction assembly	Biological Process	1	F1PBI6
4	GO:0033554	cellular response to stress	Biological Process	1	F1PCG4
4	GO:0043271	negative regulation of ion transport	Biological Process	1	F1PBI6
4	GO:0009896	positive regulation of catabolic process	Biological Process	1	J9NVE9
4	GO:1902589	single-organism organelle organization	Biological Process	1	J9NTJ3
4	GO:1901343	negative regulation of vasculature development	Biological Process	1	F1PBI6
4	GO:0098869	cellular oxidant detoxification	Biological Process	1	F1PCG4
4	GO:0010035	response to inorganic substance	Biological Process	3	F1PCG4, F1PBI6, F1PGS2
4	GO:1903846	positive regulation of cellular response to transforming growth factor beta stimulus	Biological Process	1	F1PBI6
4	GO:0050820	positive regulation of coagulation	Biological Process	1	F1PBI6
4	GO:0008104	protein localization	Biological Process	2	F1Q0C1, F1PGS2
4	GO:1903530	regulation of secretion by cell	Biological Process	1	F1PGS2
4	GO:0006486	protein glycosylation	Biological Process	1	F1PBI6
4	GO:0009891	positive regulation of biosynthetic process	Biological Process	2	F1PBI6, E2RI13
4	GO:0019637	organophosphate metabolic process	Biological Process	4	P52784, F1PBI6, F1PPB6, Q0QEN2
4	GO:0007162	negative regulation of cell adhesion	Biological Process	1	F1PBI6
4	GO:0061024	membrane organization	Biological Process	1	F1PBI6
4	GO:2000146	negative regulation of cell motility	Biological Process	1	F1PBI6
4	GO:0051301	cell division	Biological Process	1	F1PN38
4	GO:0005975	carbohydrate metabolic process	Biological Process	1	P52784
4	GO:0002468	dendritic cell antigen processing and presentation	Biological Process	1	F1PBI6
4	GO:0031589	cell-substrate adhesion	Biological Process	2	F1PBI6, F1PGS2
4	GO:0060627	regulation of vesicle-mediated transport	Biological Process	1	F1PGS2
4	GO:0030194	positive regulation of blood coagulation	Biological Process	1	F1PBI6
4	GO:0001816	cytokine production	Biological Process	1	F1PBI6
4	GO:0007017	microtubule-based process	Biological Process	3	J9NTJ3, J9P716, E2QSF4
4	GO:0050922	negative regulation of chemotaxis	Biological Process	1	F1PBI6
4	GO:1901575	organic substance catabolic process	Biological Process	4	P52784, E2QW34, F1PPB6, J9NVE9
4	GO:0006935	chemotaxis	Biological Process	1	F1PBI6
4	GO:0009889	regulation of biosynthetic process	Biological Process	4	F1PBI6, E2RI99, E2RI13, J9NVE9
4	GO:0009636	response to toxic substance	Biological Process	1	F1PCG4
4	GO:0050819	negative regulation of coagulation	Biological Process	2	F1PBI6, F1PGS2
4	GO:0008219	cell death	Biological Process	3	F1PBI6, F1PN38, F1PGS2
4	GO:0022607	cellular component assembly	Biological Process	4	F1PBI6, F1P8G0, F1PGS2, F1PBL4
4	GO:0001817	regulation of cytokine production	Biological Process	1	F1PBI6
4	GO:0044260	cellular macromolecule metabolic process	Biological Process	9	F1PBI6, E2RI99, E2QW34, E2RI13, Q9MZD3, J9NVE9, F1PN38, E2R5H4, F1PGS2
4	GO:0010564	regulation of cell cycle process	Biological Process	1	F1PN38
4	GO:0034641	cellular nitrogen compound metabolic process	Biological Process	8	P52784, F1PBI6, E2RI99, E2RI13, F1PPB6, Q0QEN2, J9NVE9, F6X870
4	GO:0098542	defense response to other organism	Biological Process	1	F1PGS2
4	GO:1903036	positive regulation of response to wounding	Biological Process	1	F1PBI6
4	GO:0090066	regulation of anatomical structure size	Biological Process	1	F1PGS2
4	GO:0051171	regulation of nitrogen compound metabolic process	Biological Process	4	F1PBI6, E2RI99, E2RI13, J9NVE9
4	GO:1901698	response to nitrogen compound	Biological Process	1	E2RI99
4	GO:0044765	single-organism transport	Biological Process	8	F1PBI6, P60529, J9JHF7, Q0QEN2, F1P8V6, F1PGS2, J9JHZ3, P60524
4	GO:0051049	regulation of transport	Biological Process	2	F1PBI6, F1PGS2
4	GO:0046483	heterocycle metabolic process	Biological Process	7	P52784, F1PBI6, E2RI99, E2RI13, F1PPB6, J9NVE9, Q0QEN2
4	GO:0090288	negative regulation of cellular response to growth factor stimulus	Biological Process	1	F1PBI6
4	GO:0042493	response to drug	Biological Process	1	F1PBI6
4	GO:0002577	regulation of antigen processing and presentation	Biological Process	1	F1PBI6
4	GO:0030195	negative regulation of blood coagulation	Biological Process	2	F1PBI6, F1PGS2
4	GO:0006081	cellular aldehyde metabolic process	Biological Process	2	P52784, F1PPB6
4	GO:0010876	lipid localization	Biological Process	1	F1PBI6
4	GO:0009615	response to virus	Biological Process	1	F1PGC3
4	GO:0051270	regulation of cellular component movement	Biological Process	1	F1PBI6
4	GO:0010632	regulation of epithelial cell migration	Biological Process	1	F1PBI6
4	GO:0051047	positive regulation of secretion	Biological Process	1	F1PGS2
4	GO:0050865	regulation of cell activation	Biological Process	1	F1PBI6
4	GO:0002504	antigen processing and presentation of peptide or polysaccharide antigen via MHC class II	Biological Process	1	F1PBI6
4	GO:0051640	organelle localization	Biological Process	1	J9NU17
4	GO:0045786	negative regulation of cell cycle	Biological Process	1	F1PBI6
4	GO:0032369	negative regulation of lipid transport	Biological Process	1	F1PBI6
4	GO:0080134	regulation of response to stress	Biological Process	3	F1PBI6, F1PGS2, C0LQL0
4	GO:0001819	positive regulation of cytokine production	Biological Process	1	F1PBI6
4	GO:0050673	epithelial cell proliferation	Biological Process	1	F1PBI6
4	GO:0003013	circulatory system process	Biological Process	1	F1PGS2
4	GO:0006996	organelle organization	Biological Process	1	J9NTJ3
4	GO:0048514	blood vessel morphogenesis	Biological Process	1	F1PBI6
4	GO:0050878	regulation of body fluid levels	Biological Process	5	F1PBI6, F1P8G0, F1PGS2, F5XVB0, F1PBL4
4	GO:0044248	cellular catabolic process	Biological Process	3	E2QW34, F1PPB6, J9NVE9
4	GO:1903524	positive regulation of blood circulation	Biological Process	1	F1PGS2
4	GO:0050867	positive regulation of cell activation	Biological Process	1	F1PBI6
4	GO:0032103	positive regulation of response to external stimulus	Biological Process	1	F1PBI6
4	GO:1901700	response to oxygen-containing compound	Biological Process	3	F1PCG4, F1PBI6, E2RI99
4	GO:0043207	response to external biotic stimulus	Biological Process	3	J9PB81, F1PGC3, F1PGS2
4	GO:0042127	regulation of cell proliferation	Biological Process	3	F1PBI6, E2RI99, F1PF31
5	GO:0071310	cellular response to organic substance	Biological Process	3	E2RI99, F1PBI6, F1PGC3
5	GO:0019439	aromatic compound catabolic process	Biological Process	1	F1PPB6
5	GO:2000181	negative regulation of blood vessel morphogenesis	Biological Process	1	F1PBI6
5	GO:0019216	regulation of lipid metabolic process	Biological Process	1	J9NVE9
5	GO:0045766	positive regulation of angiogenesis	Biological Process	1	F1PBI6
5	GO:0002580	regulation of antigen processing and presentation of peptide or polysaccharide antigen via MHC class II	Biological Process	1	F1PBI6
5	GO:0044344	cellular response to fibroblast growth factor stimulus	Biological Process	1	F1PBI6
5	GO:0071706	tumor necrosis factor superfamily cytokine production	Biological Process	1	F1PBI6
5	GO:0009914	hormone transport	Biological Process	1	F1PGS2
5	GO:0051254	positive regulation of RNA metabolic process	Biological Process	1	E2RI13
5	GO:0010467	gene expression	Biological Process	5	F1PBI6, E2RI99, E2RI13, J9NVE9, F1PGS2
5	GO:0008015	blood circulation	Biological Process	1	F1PGS2
5	GO:0051223	regulation of protein transport	Biological Process	1	F1PGS2
5	GO:0051247	positive regulation of protein metabolic process	Biological Process	3	F1PBI6, J9NVE9, F1PGS2
5	GO:1901136	carbohydrate derivative catabolic process	Biological Process	1	F1PPB6
5	GO:0090407	organophosphate biosynthetic process	Biological Process	1	Q0QEN2
5	GO:0023061	signal release	Biological Process	1	F1PGS2
5	GO:0070848	response to growth factor	Biological Process	1	F1PBI6
5	GO:0006818	hydrogen transport	Biological Process	1	Q0QEN2
5	GO:0051046	regulation of secretion	Biological Process	1	F1PGS2
5	GO:0006493	protein O-linked glycosylation	Biological Process	1	F1PBI6
5	GO:0010595	positive regulation of endothelial cell migration	Biological Process	1	F1PBI6
5	GO:1901293	nucleoside phosphate biosynthetic process	Biological Process	1	Q0QEN2
5	GO:0050727	regulation of inflammatory response	Biological Process	1	C0LQL0
5	GO:0006757	ATP generation from ADP	Biological Process	1	P52784
5	GO:1901292	nucleoside phosphate catabolic process	Biological Process	1	F1PPB6
5	GO:0006002	fructose 6-phosphate metabolic process	Biological Process	1	P52784
5	GO:0042730	fibrinolysis	Biological Process	2	F1PBI6, F1PGS2
5	GO:0034250	positive regulation of cellular amide metabolic process	Biological Process	1	F1PBI6
5	GO:0032269	negative regulation of cellular protein metabolic process	Biological Process	1	F1PBI6
5	GO:0040037	negative regulation of fibroblast growth factor receptor signaling pathway	Biological Process	1	F1PBI6
5	GO:0050680	negative regulation of epithelial cell proliferation	Biological Process	1	F1PBI6
5	GO:0034116	positive regulation of heterotypic cell-cell adhesion	Biological Process	1	F1PGS2
5	GO:0090276	regulation of peptide hormone secretion	Biological Process	1	F1PGS2
5	GO:0010629	negative regulation of gene expression	Biological Process	2	F1PBI6, J9NVE9
5	GO:0001655	urogenital system development	Biological Process	1	E2RI99
5	GO:0006801	superoxide metabolic process	Biological Process	1	F1PCG4
5	GO:0019438	aromatic compound biosynthetic process	Biological Process	4	E2RI99, E2RI13, J9NVE9, Q0QEN2
5	GO:1901659	glycosyl compound biosynthetic process	Biological Process	1	Q0QEN2
5	GO:0051648	vesicle localization	Biological Process	1	J9NU17
5	GO:0010468	regulation of gene expression	Biological Process	4	F1PBI6, E2RI99, E2RI13, J9NVE9
5	GO:0061245	establishment or maintenance of bipolar cell polarity	Biological Process	1	J9NTJ3
5	GO:0032615	interleukin-12 production	Biological Process	1	F1PBI6
5	GO:0035556	intracellular signal transduction	Biological Process	4	E2RIG8, F1PBI6, J9NVE9, F1PGS2
5	GO:0007010	cytoskeleton organization	Biological Process	1	J9NTJ3
5	GO:0071560	cellular response to transforming growth factor beta stimulus	Biological Process	1	F1PBI6
5	GO:1902532	negative regulation of intracellular signal transduction	Biological Process	1	F1PBI6
5	GO:1903392	negative regulation of adherens junction organization	Biological Process	1	F1PBI6
5	GO:2001234	negative regulation of apoptotic signaling pathway	Biological Process	2	F1PBI6, F1PGS2
5	GO:0044267	cellular protein metabolic process	Biological Process	7	F1PBI6, E2QW34, Q9MZD3, J9NVE9, F1PN38, E2R5H4, F1PGS2
5	GO:0009057	macromolecule catabolic process	Biological Process	1	E2QW34
5	GO:0044283	small molecule biosynthetic process	Biological Process	1	P52784
5	GO:0044242	cellular lipid catabolic process	Biological Process	1	J9NVE9
5	GO:0051174	regulation of phosphorus metabolic process	Biological Process	3	F1PBI6, J9NVE9, F1PGS2
5	GO:0051917	regulation of fibrinolysis	Biological Process	1	F1PBI6
5	GO:0051156	glucose 6-phosphate metabolic process	Biological Process	2	P52784, F1PPB6
5	GO:0051253	negative regulation of RNA metabolic process	Biological Process	1	J9NVE9
5	GO:0046903	secretion	Biological Process	2	F1PBI6, F1PGS2
5	GO:0043269	regulation of ion transport	Biological Process	1	F1PBI6
5	GO:0045907	positive regulation of vasoconstriction	Biological Process	1	F1PGS2
5	GO:0090304	nucleic acid metabolic process	Biological Process	3	E2RI99, E2RI13, J9NVE9
5	GO:0010594	regulation of endothelial cell migration	Biological Process	1	F1PBI6
5	GO:0034645	cellular macromolecule biosynthetic process	Biological Process	4	F1PBI6, E2RI99, E2RI13, J9NVE9
5	GO:0033993	response to lipid	Biological Process	1	F1PBI6
5	GO:0030336	negative regulation of cell migration	Biological Process	1	F1PBI6
5	GO:0010812	negative regulation of cell-substrate adhesion	Biological Process	1	F1PBI6
5	GO:0043436	oxoacid metabolic process	Biological Process	1	P52784
5	GO:0043086	negative regulation of catalytic activity	Biological Process	1	F1PBI6
5	GO:0030334	regulation of cell migration	Biological Process	1	F1PBI6
5	GO:0009116	nucleoside metabolic process	Biological Process	2	P52784, Q0QEN2
5	GO:0071705	nitrogen compound transport	Biological Process	1	F1PGS2
5	GO:0007600	sensory perception	Biological Process	1	J9NU17
5	GO:0040036	regulation of fibroblast growth factor receptor signaling pathway	Biological Process	1	F1PBI6
5	GO:0051248	negative regulation of protein metabolic process	Biological Process	1	F1PBI6
5	GO:1901362	organic cyclic compound biosynthetic process	Biological Process	4	E2RI99, E2RI13, J9NVE9, Q0QEN2
5	GO:2001026	regulation of endothelial cell chemotaxis	Biological Process	1	F1PBI6
5	GO:0018130	heterocycle biosynthetic process	Biological Process	4	E2RI99, E2RI13, J9NVE9, Q0QEN2
5	GO:1903555	regulation of tumor necrosis factor superfamily cytokine production	Biological Process	1	F1PBI6
5	GO:0036211	protein modification process	Biological Process	6	F1PBI6, Q9MZD3, J9NVE9, F1PN38, E2R5H4, F1PGS2
5	GO:0035150	regulation of tube size	Biological Process	1	F1PGS2
5	GO:0070201	regulation of establishment of protein localization	Biological Process	1	F1PGS2
5	GO:0090092	regulation of transmembrane receptor protein serine/threonine kinase signaling pathway	Biological Process	1	F1PBI6
5	GO:0031326	regulation of cellular biosynthetic process	Biological Process	4	F1PBI6, E2RI99, E2RI13, J9NVE9
5	GO:0042107	cytokine metabolic process	Biological Process	1	F1PBI6
5	GO:0032465	regulation of cytokinesis	Biological Process	1	F1PN38
5	GO:0034655	nucleobase-containing compound catabolic process	Biological Process	1	F1PPB6
5	GO:0044265	cellular macromolecule catabolic process	Biological Process	1	E2QW34
5	GO:0006461	protein complex assembly	Biological Process	3	F1P8G0, F1PGS2, F1PBL4
5	GO:0051604	protein maturation	Biological Process	2	F1PBI6, F1PGS2
5	GO:0072521	purine-containing compound metabolic process	Biological Process	3	P52784, F1PBI6, Q0QEN2
5	GO:0097190	apoptotic signaling pathway	Biological Process	2	F1PBI6, F1PGS2
5	GO:1903034	regulation of response to wounding	Biological Process	2	F1PBI6, F1PGS2
5	GO:1901701	cellular response to oxygen-containing compound	Biological Process	1	F1PCG4
5	GO:0051252	regulation of RNA metabolic process	Biological Process	3	E2RI99, E2RI13, J9NVE9
5	GO:0051246	regulation of protein metabolic process	Biological Process	3	F1PBI6, J9NVE9, F1PGS2
5	GO:0034114	regulation of heterotypic cell-cell adhesion	Biological Process	1	F1PGS2
5	GO:0032655	regulation of interleukin-12 production	Biological Process	1	F1PBI6
5	GO:0090303	positive regulation of wound healing	Biological Process	1	F1PBI6
5	GO:0007160	cell-matrix adhesion	Biological Process	2	F1PBI6, F1PGS2
5	GO:1901566	organonitrogen compound biosynthetic process	Biological Process	2	F1PBI6, Q0QEN2
5	GO:0005996	monosaccharide metabolic process	Biological Process	1	P52784
5	GO:0046434	organophosphate catabolic process	Biological Process	1	F1PPB6
5	GO:0072359	circulatory system development	Biological Process	1	F1PBI6
5	GO:1901889	negative regulation of cell junction assembly	Biological Process	1	F1PBI6
5	GO:0045921	positive regulation of exocytosis	Biological Process	1	F1PGS2
5	GO:0043030	regulation of macrophage activation	Biological Process	1	F1PBI6
5	GO:0072524	pyridine-containing compound metabolic process	Biological Process	2	P52784, F1PPB6
5	GO:0007599	hemostasis	Biological Process	5	F1PBI6, F1P8G0, F1PGS2, F5XVB0, F1PBL4
5	GO:0006518	peptide metabolic process	Biological Process	2	F1PBI6, F6X870
5	GO:0060326	cell chemotaxis	Biological Process	1	F1PBI6
5	GO:0015669	gas transport	Biological Process	5	P60529, J9JHF7, F1P8V6, J9JHZ3, P60524
5	GO:0032890	regulation of organic acid transport	Biological Process	1	F1PBI6
5	GO:0034766	negative regulation of ion transmembrane transport	Biological Process	1	F1PBI6
5	GO:0032368	regulation of lipid transport	Biological Process	1	F1PBI6
5	GO:0009262	deoxyribonucleotide metabolic process	Biological Process	1	F1PPB6
5	GO:0043032	positive regulation of macrophage activation	Biological Process	1	F1PBI6
5	GO:0030335	positive regulation of cell migration	Biological Process	1	F1PBI6
5	GO:0090109	regulation of cell-substrate junction assembly	Biological Process	1	F1PBI6
5	GO:0044724	single-organism carbohydrate catabolic process	Biological Process	1	P52784
5	GO:2000192	negative regulation of fatty acid transport	Biological Process	1	F1PBI6
5	GO:0072358	cardiovascular system development	Biological Process	1	F1PBI6
5	GO:0002604	regulation of dendritic cell antigen processing and presentation	Biological Process	1	F1PBI6
5	GO:0007596	blood coagulation	Biological Process	5	F1PBI6, F1P8G0, F1PGS2, F5XVB0, F1PBL4
5	GO:1901342	regulation of vasculature development	Biological Process	1	F1PBI6
5	GO:0019682	glyceraldehyde-3-phosphate metabolic process	Biological Process	2	P52784, F1PPB6
5	GO:0045935	positive regulation of nucleobase-containing compound metabolic process	Biological Process	1	E2RI13
5	GO:0016070	RNA metabolic process	Biological Process	3	E2RI99, E2RI13, J9NVE9
5	GO:0034248	regulation of cellular amide metabolic process	Biological Process	1	F1PBI6
5	GO:2001235	positive regulation of apoptotic signaling pathway	Biological Process	1	F1PBI6
5	GO:0002605	negative regulation of dendritic cell antigen processing and presentation	Biological Process	1	F1PBI6
5	GO:0031328	positive regulation of cellular biosynthetic process	Biological Process	2	F1PBI6, E2RI13
5	GO:0090277	positive regulation of peptide hormone secretion	Biological Process	1	F1PGS2
5	GO:0009059	macromolecule biosynthetic process	Biological Process	4	F1PBI6, E2RI99, E2RI13, J9NVE9
5	GO:1903522	regulation of blood circulation	Biological Process	1	F1PGS2
5	GO:0006954	inflammatory response	Biological Process	3	F1PBI6, J9NVE9, C0LQL0
5	GO:0017157	regulation of exocytosis	Biological Process	1	F1PGS2
5	GO:0006869	lipid transport	Biological Process	1	F1PBI6
5	GO:0031347	regulation of defense response	Biological Process	1	C0LQL0
5	GO:0050714	positive regulation of protein secretion	Biological Process	1	F1PGS2
5	GO:0032270	positive regulation of cellular protein metabolic process	Biological Process	3	F1PBI6, J9NVE9, F1PGS2
5	GO:0001935	endothelial cell proliferation	Biological Process	1	F1PBI6
5	GO:0009306	protein secretion	Biological Process	1	F1PGS2
5	GO:0019079	viral genome replication	Biological Process	1	Q9MZD3
5	GO:0030168	platelet activation	Biological Process	3	F1P8G0, F1PGS2, F1PBL4
5	GO:0010562	positive regulation of phosphorus metabolic process	Biological Process	3	F1PBI6, J9NVE9, F1PGS2
5	GO:0031327	negative regulation of cellular biosynthetic process	Biological Process	1	J9NVE9
5	GO:2000377	regulation of reactive oxygen species metabolic process	Biological Process	1	F1PBI6
5	GO:0090132	epithelium migration	Biological Process	1	F1PBI6
5	GO:0000302	response to reactive oxygen species	Biological Process	1	F1PCG4
5	GO:0043069	negative regulation of programmed cell death	Biological Process	2	F1PBI6, F1PGS2
5	GO:0000165	MAPK cascade	Biological Process	3	F1PBI6, J9NVE9, F1PGS2
5	GO:0055085	transmembrane transport	Biological Process	3	F1PBI6, Q0QEN2, F1P865
5	GO:0032695	negative regulation of interleukin-12 production	Biological Process	1	F1PBI6
5	GO:0061045	negative regulation of wound healing	Biological Process	2	F1PBI6, F1PGS2
5	GO:0046700	heterocycle catabolic process	Biological Process	1	F1PPB6
5	GO:1901137	carbohydrate derivative biosynthetic process	Biological Process	2	F1PBI6, Q0QEN2
5	GO:0002581	negative regulation of antigen processing and presentation of peptide or polysaccharide antigen via MHC class II	Biological Process	1	F1PBI6
5	GO:0042089	cytokine biosynthetic process	Biological Process	1	F1PBI6
5	GO:0000305	response to oxygen radical	Biological Process	1	F1PCG4
5	GO:0042060	wound healing	Biological Process	5	F1PBI6, F1P8G0, F1PGS2, F5XVB0, F1PBL4
5	GO:0009743	response to carbohydrate	Biological Process	1	F1PBI6
5	GO:0034329	cell junction assembly	Biological Process	1	F1PBI6
5	GO:0098742	cell-cell adhesion via plasma-membrane adhesion molecules	Biological Process	1	F1PE38
5	GO:0050678	regulation of epithelial cell proliferation	Biological Process	1	F1PBI6
5	GO:0010558	negative regulation of macromolecule biosynthetic process	Biological Process	1	J9NVE9
5	GO:0010628	positive regulation of gene expression	Biological Process	2	F1PBI6, E2RI13
5	GO:0036065	fucosylation	Biological Process	1	F1PBI6
5	GO:0050996	positive regulation of lipid catabolic process	Biological Process	1	J9NVE9
5	GO:0071702	organic substance transport	Biological Process	3	F1PBI6, F1Q0C1, F1PGS2
5	GO:0034113	heterotypic cell-cell adhesion	Biological Process	1	F1PGS2
5	GO:0030163	protein catabolic process	Biological Process	1	E2QW34
5	GO:0007166	cell surface receptor signaling pathway	Biological Process	2	F1PBI6, F1PGS2
5	GO:0014070	response to organic cyclic compound	Biological Process	1	F1PBI6
5	GO:0019430	removal of superoxide radicals	Biological Process	1	F1PCG4
5	GO:0042742	defense response to bacterium	Biological Process	1	F1PGS2
5	GO:1901654	response to ketone	Biological Process	1	F1PBI6
5	GO:0051338	regulation of transferase activity	Biological Process	1	F1PBI6
5	GO:0019219	regulation of nucleobase-containing compound metabolic process	Biological Process	4	F1PBI6, E2RI99, E2RI13, J9NVE9
5	GO:0090087	regulation of peptide transport	Biological Process	1	F1PGS2
5	GO:2001027	negative regulation of endothelial cell chemotaxis	Biological Process	1	F1PBI6
5	GO:0034654	nucleobase-containing compound biosynthetic process	Biological Process	4	E2RI99, E2RI13, J9NVE9, Q0QEN2
5	GO:0044271	cellular nitrogen compound biosynthetic process	Biological Process	5	F1PBI6, E2RI99, E2RI13, J9NVE9, Q0QEN2
5	GO:0015849	organic acid transport	Biological Process	1	F1PBI6
5	GO:0072001	renal system development	Biological Process	1	E2RI99
5	GO:0090100	positive regulation of transmembrane receptor protein serine/threonine kinase signaling pathway	Biological Process	1	F1PBI6
5	GO:0016192	vesicle-mediated transport	Biological Process	2	F1PBI6, F1PGS2
5	GO:0010748	negative regulation of plasma membrane long-chain fatty acid transport	Biological Process	1	F1PBI6
5	GO:0043413	macromolecule glycosylation	Biological Process	1	F1PBI6
5	GO:1903557	positive regulation of tumor necrosis factor superfamily cytokine production	Biological Process	1	F1PBI6
5	GO:0010596	negative regulation of endothelial cell migration	Biological Process	1	F1PBI6
5	GO:0044270	cellular nitrogen compound catabolic process	Biological Process	1	F1PPB6
5	GO:0034599	cellular response to oxidative stress	Biological Process	1	F1PCG4
5	GO:0010324	membrane invagination	Biological Process	1	F1PBI6
5	GO:0071822	protein complex subunit organization	Biological Process	4	F1P8G0, F1Q432, F1PGS2, F1PBL4
5	GO:1903391	regulation of adherens junction organization	Biological Process	1	F1PBI6
5	GO:0015031	protein transport	Biological Process	2	F1Q0C1, F1PGS2
5	GO:0016525	negative regulation of angiogenesis	Biological Process	1	F1PBI6
5	GO:2001233	regulation of apoptotic signaling pathway	Biological Process	2	F1PBI6, F1PGS2
5	GO:0001944	vasculature development	Biological Process	1	F1PBI6
5	GO:0019058	viral life cycle	Biological Process	1	Q9MZD3
5	GO:0050708	regulation of protein secretion	Biological Process	1	F1PGS2
5	GO:0042116	macrophage activation	Biological Process	1	F1PBI6
5	GO:0030198	extracellular matrix organization	Biological Process	2	F1PBI6, F1Q432
5	GO:0006753	nucleoside phosphate metabolic process	Biological Process	4	P52784, F1PBI6, F1PPB6, Q0QEN2
5	GO:0001952	regulation of cell-matrix adhesion	Biological Process	1	F1PBI6
5	GO:0016042	lipid catabolic process	Biological Process	1	J9NVE9
5	GO:1901361	organic cyclic compound catabolic process	Biological Process	1	F1PPB6
5	GO:0000226	microtubule cytoskeleton organization	Biological Process	1	J9NTJ3
5	GO:0001667	ameboidal-type cell migration	Biological Process	1	F1PBI6
5	GO:0003018	vascular process in circulatory system	Biological Process	1	F1PGS2
5	GO:1903792	negative regulation of anion transport	Biological Process	1	F1PBI6
5	GO:0016051	carbohydrate biosynthetic process	Biological Process	1	P52784
5	GO:0006887	exocytosis	Biological Process	2	F1PBI6, F1PGS2
5	GO:0010556	regulation of macromolecule biosynthetic process	Biological Process	4	F1PBI6, E2RI99, E2RI13, J9NVE9
5	GO:0010557	positive regulation of macromolecule biosynthetic process	Biological Process	2	F1PBI6, E2RI13
5	GO:0043068	positive regulation of programmed cell death	Biological Process	1	F1PBI6
5	GO:0045216	cell-cell junction organization	Biological Process	1	F1PBI6
5	GO:0042035	regulation of cytokine biosynthetic process	Biological Process	1	F1PBI6
5	GO:0042108	positive regulation of cytokine biosynthetic process	Biological Process	1	F1PBI6
5	GO:1902533	positive regulation of intracellular signal transduction	Biological Process	3	F1PBI6, J9NVE9, F1PGS2
5	GO:0043085	positive regulation of catalytic activity	Biological Process	1	F1PBI6
5	GO:0019693	ribose phosphate metabolic process	Biological Process	4	P52784, F1PBI6, F1PPB6, Q0QEN2
5	GO:0034762	regulation of transmembrane transport	Biological Process	1	F1PBI6
5	GO:0002793	positive regulation of peptide secretion	Biological Process	1	F1PGS2
5	GO:0034109	homotypic cell-cell adhesion	Biological Process	1	F1PGS2
5	GO:0006732	coenzyme metabolic process	Biological Process	2	P52784, F1PPB6
5	GO:0010038	response to metal ion	Biological Process	2	F1PBI6, F1PGS2
5	GO:0006508	proteolysis	Biological Process	4	F1PBI6, E2QW34, J9PB81, F1PGS2
5	GO:0043603	cellular amide metabolic process	Biological Process	2	F1PBI6, F6X870
5	GO:1903844	regulation of cellular response to transforming growth factor beta stimulus	Biological Process	1	F1PBI6
5	GO:0006811	ion transport	Biological Process	3	F1PBI6, Q0QEN2, F1P865
5	GO:0009100	glycoprotein metabolic process	Biological Process	1	F1PBI6
5	GO:0032268	regulation of cellular protein metabolic process	Biological Process	3	F1PBI6, J9NVE9, F1PGS2
5	GO:0045934	negative regulation of nucleobase-containing compound metabolic process	Biological Process	1	J9NVE9
5	GO:0006796	phosphate-containing compound metabolic process	Biological Process	7	P52784, F1PBI6, F1PPB6, Q0QEN2, J9NVE9, E2R5H4, F1PGS2
5	GO:0043412	macromolecule modification	Biological Process	6	F1PBI6, Q9MZD3, J9NVE9, F1PN38, E2R5H4, F1PGS2
5	GO:2000379	positive regulation of reactive oxygen species metabolic process	Biological Process	1	F1PBI6
5	GO:0002040	sprouting angiogenesis	Biological Process	1	F1PBI6
5	GO:0016052	carbohydrate catabolic process	Biological Process	1	P52784
5	GO:0012501	programmed cell death	Biological Process	3	F1PBI6, F1PN38, F1PGS2
5	GO:0050994	regulation of lipid catabolic process	Biological Process	1	J9NVE9
5	GO:1903900	regulation of viral life cycle	Biological Process	1	Q9MZD3
5	GO:0034097	response to cytokine	Biological Process	2	E2RI99, F1PGC3
5	GO:0051336	regulation of hydrolase activity	Biological Process	1	F1PBI6
5	GO:0045765	regulation of angiogenesis	Biological Process	1	F1PBI6
5	GO:0065003	macromolecular complex assembly	Biological Process	3	F1P8G0, F1PGS2, F1PBL4
5	GO:0019731	antibacterial humoral response	Biological Process	1	F1PGS2
5	GO:0048545	response to steroid hormone	Biological Process	1	F1PBI6
5	GO:1902531	regulation of intracellular signal transduction	Biological Process	3	F1PBI6, J9NVE9, F1PGS2
5	GO:0043067	regulation of programmed cell death	Biological Process	2	F1PBI6, F1PGS2
5	GO:0030511	positive regulation of transforming growth factor beta receptor signaling pathway	Biological Process	1	F1PBI6
5	GO:0006909	phagocytosis	Biological Process	1	F1PBI6
6	GO:1903317	regulation of protein maturation	Biological Process	1	F1PBI6
6	GO:0001578	microtubule bundle formation	Biological Process	1	J9NTJ3
6	GO:0042534	regulation of tumor necrosis factor biosynthetic process	Biological Process	1	F1PBI6
6	GO:2000112	regulation of cellular macromolecule biosynthetic process	Biological Process	4	F1PBI6, E2RI99, E2RI13, J9NVE9
6	GO:0044070	regulation of anion transport	Biological Process	1	F1PBI6
6	GO:0001953	negative regulation of cell-matrix adhesion	Biological Process	1	F1PBI6
6	GO:0045861	negative regulation of proteolysis	Biological Process	1	F1PBI6
6	GO:0045055	regulated exocytosis	Biological Process	1	F1PBI6
6	GO:0045727	positive regulation of translation	Biological Process	1	F1PBI6
6	GO:0016485	protein processing	Biological Process	2	F1PBI6, F1PGS2
6	GO:0051347	positive regulation of transferase activity	Biological Process	1	F1PBI6
6	GO:0051896	regulation of protein kinase B signaling	Biological Process	1	F1PBI6
6	GO:0032760	positive regulation of tumor necrosis factor production	Biological Process	1	F1PBI6
6	GO:0010752	regulation of cGMP-mediated signaling	Biological Process	1	F1PBI6
6	GO:1902680	positive regulation of RNA biosynthetic process	Biological Process	1	E2RI13
6	GO:0034765	regulation of ion transmembrane transport	Biological Process	1	F1PBI6
6	GO:0034333	adherens junction assembly	Biological Process	1	F1PBI6
6	GO:0010631	epithelial cell migration	Biological Process	1	F1PBI6
6	GO:0071363	cellular response to growth factor stimulus	Biological Process	1	F1PBI6
6	GO:0043065	positive regulation of apoptotic process	Biological Process	1	F1PBI6
6	GO:0009117	nucleotide metabolic process	Biological Process	4	P52784, F1PBI6, F1PPB6, Q0QEN2
6	GO:0043604	amide biosynthetic process	Biological Process	1	F1PBI6
6	GO:2000191	regulation of fatty acid transport	Biological Process	1	F1PBI6
6	GO:0009264	deoxyribonucleotide catabolic process	Biological Process	1	F1PPB6
6	GO:0009166	nucleotide catabolic process	Biological Process	1	F1PPB6
6	GO:0010749	regulation of nitric oxide mediated signal transduction	Biological Process	1	F1PBI6
6	GO:0042533	tumor necrosis factor biosynthetic process	Biological Process	1	F1PBI6
6	GO:0017015	regulation of transforming growth factor beta receptor signaling pathway	Biological Process	1	F1PBI6
6	GO:0043549	regulation of kinase activity	Biological Process	1	F1PBI6
6	GO:0009259	ribonucleotide metabolic process	Biological Process	3	P52784, F1PBI6, Q0QEN2
6	GO:0046364	monosaccharide biosynthetic process	Biological Process	1	P52784
6	GO:0019318	hexose metabolic process	Biological Process	1	P52784
6	GO:0010762	regulation of fibroblast migration	Biological Process	1	F1PBI6
6	GO:0043535	regulation of blood vessel endothelial cell migration	Biological Process	1	F1PBI6
6	GO:0015711	organic anion transport	Biological Process	1	F1PBI6
6	GO:0002790	peptide secretion	Biological Process	1	F1PGS2
6	GO:0048041	focal adhesion assembly	Biological Process	1	F1PBI6
6	GO:0008543	fibroblast growth factor receptor signaling pathway	Biological Process	1	F1PBI6
6	GO:2000113	negative regulation of cellular macromolecule biosynthetic process	Biological Process	1	J9NVE9
6	GO:0034614	cellular response to reactive oxygen species	Biological Process	1	F1PCG4
6	GO:0007167	enzyme linked receptor protein signaling pathway	Biological Process	1	F1PBI6
6	GO:0010746	regulation of plasma membrane long-chain fatty acid transport	Biological Process	1	F1PBI6
6	GO:0006820	anion transport	Biological Process	1	F1PBI6
6	GO:0015833	peptide transport	Biological Process	1	F1PGS2
6	GO:0042278	purine nucleoside metabolic process	Biological Process	2	P52784, Q0QEN2
6	GO:0045937	positive regulation of phosphate metabolic process	Biological Process	3	F1PBI6, J9NVE9, F1PGS2
6	GO:2001141	regulation of RNA biosynthetic process	Biological Process	3	E2RI99, E2RI13, J9NVE9
6	GO:0042535	positive regulation of tumor necrosis factor biosynthetic process	Biological Process	1	F1PBI6
6	GO:0035088	establishment or maintenance of apical/basal cell polarity	Biological Process	1	J9NTJ3
6	GO:0010754	negative regulation of cGMP-mediated signaling	Biological Process	1	F1PBI6
6	GO:0015908	fatty acid transport	Biological Process	1	F1PBI6
6	GO:0072522	purine-containing compound biosynthetic process	Biological Process	1	Q0QEN2
6	GO:0071345	cellular response to cytokine stimulus	Biological Process	2	E2RI99, F1PGC3
6	GO:0032570	response to progesterone	Biological Process	1	F1PBI6
6	GO:0043043	peptide biosynthetic process	Biological Process	1	F1PBI6
6	GO:0019752	carboxylic acid metabolic process	Biological Process	1	P52784
6	GO:0015992	proton transport	Biological Process	1	Q0QEN2
6	GO:0051346	negative regulation of hydrolase activity	Biological Process	1	F1PBI6
6	GO:0006163	purine nucleotide metabolic process	Biological Process	3	P52784, F1PBI6, Q0QEN2
6	GO:0002526	acute inflammatory response	Biological Process	1	J9NVE9
6	GO:0009132	nucleoside diphosphate metabolic process	Biological Process	1	P52784
6	GO:0043623	cellular protein complex assembly	Biological Process	3	F1P8G0, F1PGS2, F1PBL4
6	GO:0006096	glycolytic process	Biological Process	1	P52784
6	GO:0006897	endocytosis	Biological Process	1	F1PBI6
6	GO:0070371	ERK1 and ERK2 cascade	Biological Process	2	J9NVE9, F1PGS2
6	GO:0019932	second-messenger-mediated signaling	Biological Process	1	F1PBI6
6	GO:0061041	regulation of wound healing	Biological Process	2	F1PBI6, F1PGS2
6	GO:0051893	regulation of focal adhesion assembly	Biological Process	1	F1PBI6
6	GO:0001936	regulation of endothelial cell proliferation	Biological Process	1	F1PBI6
6	GO:0045069	regulation of viral genome replication	Biological Process	1	Q9MZD3
6	GO:0007179	transforming growth factor beta receptor signaling pathway	Biological Process	1	F1PBI6
6	GO:0043410	positive regulation of MAPK cascade	Biological Process	3	F1PBI6, J9NVE9, F1PGS2
6	GO:0009119	ribonucleoside metabolic process	Biological Process	2	P52784, Q0QEN2
6	GO:0009141	nucleoside triphosphate metabolic process	Biological Process	2	P52784, Q0QEN2
6	GO:0030199	collagen fibril organization	Biological Process	1	F1Q432
6	GO:0016310	phosphorylation	Biological Process	5	P52784, F1PBI6, J9NVE9, E2R5H4, F1PGS2
6	GO:0010737	protein kinase A signaling	Biological Process	1	J9NVE9
6	GO:0032640	tumor necrosis factor production	Biological Process	1	F1PBI6
6	GO:0010608	posttranscriptional regulation of gene expression	Biological Process	1	F1PBI6
6	GO:0034332	adherens junction organization	Biological Process	1	F1PBI6
6	GO:0050880	regulation of blood vessel size	Biological Process	1	F1PGS2
6	GO:0051603	proteolysis involved in cellular protein catabolic process	Biological Process	1	E2QW34
6	GO:0006915	apoptotic process	Biological Process	3	F1PBI6, F1PN38, F1PGS2
6	GO:0034284	response to monosaccharide	Biological Process	1	F1PBI6
6	GO:0043066	negative regulation of apoptotic process	Biological Process	2	F1PBI6, F1PGS2
6	GO:0006140	regulation of nucleotide metabolic process	Biological Process	1	F1PBI6
6	GO:0009101	glycoprotein biosynthetic process	Biological Process	1	F1PBI6
6	GO:0006351	transcription, DNA-templated	Biological Process	3	E2RI99, E2RI13, J9NVE9
6	GO:0006812	cation transport	Biological Process	1	Q0QEN2
6	GO:0010751	negative regulation of nitric oxide mediated signal transduction	Biological Process	1	F1PBI6
6	GO:0044257	cellular protein catabolic process	Biological Process	1	E2QW34
6	GO:0042886	amide transport	Biological Process	1	F1PGS2
6	GO:0034220	ion transmembrane transport	Biological Process	2	F1PBI6, Q0QEN2
6	GO:0051897	positive regulation of protein kinase B signaling	Biological Process	1	F1PBI6
6	GO:1903960	negative regulation of anion transmembrane transport	Biological Process	1	F1PBI6
6	GO:0009163	nucleoside biosynthetic process	Biological Process	1	Q0QEN2
6	GO:0019362	pyridine nucleotide metabolic process	Biological Process	2	P52784, F1PPB6
6	GO:0030162	regulation of proteolysis	Biological Process	1	F1PBI6
6	GO:0051592	response to calcium ion	Biological Process	2	F1PBI6, F1PGS2
6	GO:0097191	extrinsic apoptotic signaling pathway	Biological Process	2	F1PBI6, F1PGS2
6	GO:0007044	cell-substrate junction assembly	Biological Process	1	F1PBI6
6	GO:1902001	fatty acid transmembrane transport	Biological Process	1	F1PBI6
6	GO:0043537	negative regulation of blood vessel endothelial cell migration	Biological Process	1	F1PBI6
6	GO:0000303	response to superoxide	Biological Process	1	F1PCG4
6	GO:0010763	positive regulation of fibroblast migration	Biological Process	1	F1PBI6
6	GO:0046879	hormone secretion	Biological Process	1	F1PGS2
6	GO:0010739	positive regulation of protein kinase A signaling	Biological Process	1	J9NVE9
6	GO:1902679	negative regulation of RNA biosynthetic process	Biological Process	1	J9NVE9
6	GO:0052547	regulation of peptidase activity	Biological Process	1	F1PBI6
6	GO:0071450	cellular response to oxygen radical	Biological Process	1	F1PCG4
6	GO:0010761	fibroblast migration	Biological Process	1	F1PBI6
6	GO:0051895	negative regulation of focal adhesion assembly	Biological Process	1	F1PBI6
6	GO:0009123	nucleoside monophosphate metabolic process	Biological Process	2	P52784, Q0QEN2
6	GO:0031399	regulation of protein modification process	Biological Process	3	F1PBI6, J9NVE9, F1PGS2
6	GO:0043277	apoptotic cell clearance	Biological Process	1	F1PBI6
6	GO:0006733	oxidoreduction coenzyme metabolic process	Biological Process	2	P52784, F1PPB6
6	GO:0032774	RNA biosynthetic process	Biological Process	3	E2RI99, E2RI13, J9NVE9
6	GO:2001238	positive regulation of extrinsic apoptotic signaling pathway	Biological Process	1	F1PBI6
6	GO:0046390	ribose phosphate biosynthetic process	Biological Process	1	Q0QEN2
6	GO:0002544	chronic inflammatory response	Biological Process	1	F1PBI6
6	GO:0045893	positive regulation of transcription, DNA-templated	Biological Process	1	E2RI13
6	GO:0006355	regulation of transcription, DNA-templated	Biological Process	3	E2RI99, E2RI13, J9NVE9
6	GO:0032680	regulation of tumor necrosis factor production	Biological Process	1	F1PBI6
6	GO:0043491	protein kinase B signaling	Biological Process	1	F1PBI6
6	GO:0007156	homophilic cell adhesion via plasma membrane adhesion molecules	Biological Process	1	F1PE38
6	GO:0001937	negative regulation of endothelial cell proliferation	Biological Process	1	F1PBI6
6	GO:0019229	regulation of vasoconstriction	Biological Process	1	F1PGS2
6	GO:0006464	cellular protein modification process	Biological Process	6	F1PBI6, Q9MZD3, J9NVE9, F1PN38, E2R5H4, F1PGS2
6	GO:0019220	regulation of phosphate metabolic process	Biological Process	3	F1PBI6, J9NVE9, F1PGS2
6	GO:0010738	regulation of protein kinase A signaling	Biological Process	1	J9NVE9
6	GO:0043152	induction of bacterial agglutination	Biological Process	1	F1PGS2
6	GO:0006098	pentose-phosphate shunt	Biological Process	2	P52784, F1PPB6
6	GO:0042981	regulation of apoptotic process	Biological Process	2	F1PBI6, F1PGS2
6	GO:1903318	negative regulation of protein maturation	Biological Process	1	F1PBI6
6	GO:0045892	negative regulation of transcription, DNA-templated	Biological Process	1	J9NVE9
6	GO:0043536	positive regulation of blood vessel endothelial cell migration	Biological Process	1	F1PBI6
6	GO:0009142	nucleoside triphosphate biosynthetic process	Biological Process	1	Q0QEN2
6	GO:0036066	protein O-linked fucosylation	Biological Process	1	F1PBI6
6	GO:0006911	phagocytosis, engulfment	Biological Process	1	F1PBI6
6	GO:0035767	endothelial cell chemotaxis	Biological Process	1	F1PBI6
6	GO:2001236	regulation of extrinsic apoptotic signaling pathway	Biological Process	2	F1PBI6, F1PGS2
6	GO:0007264	small GTPase mediated signal transduction	Biological Process	1	E2RIG8
6	GO:2001237	negative regulation of extrinsic apoptotic signaling pathway	Biological Process	2	F1PBI6, F1PGS2
6	GO:0009165	nucleotide biosynthetic process	Biological Process	1	Q0QEN2
6	GO:0035455	response to interferon-alpha	Biological Process	1	F1PGC3
6	GO:0031401	positive regulation of protein modification process	Biological Process	3	F1PBI6, J9NVE9, F1PGS2
6	GO:0070527	platelet aggregation	Biological Process	1	F1PGS2
6	GO:0006417	regulation of translation	Biological Process	1	F1PBI6
6	GO:0006412	translation	Biological Process	1	F1PBI6
6	GO:0043408	regulation of MAPK cascade	Biological Process	3	F1PBI6, J9NVE9, F1PGS2
6	GO:0050954	sensory perception of mechanical stimulus	Biological Process	1	J9NU17
6	GO:0090662	ATP hydrolysis coupled transmembrane transport	Biological Process	1	Q0QEN2
6	GO:0032026	response to magnesium ion	Biological Process	1	F1PBI6
6	GO:0015671	oxygen transport	Biological Process	5	P60529, J9JHF7, F1P8V6, J9JHZ3, P60524
6	GO:1903825	organic acid transmembrane transport	Biological Process	1	F1PBI6
6	GO:0002791	regulation of peptide secretion	Biological Process	1	F1PGS2
6	GO:0034622	cellular macromolecular complex assembly	Biological Process	3	F1P8G0, F1PGS2, F1PBL4
6	GO:0009124	nucleoside monophosphate biosynthetic process	Biological Process	1	Q0QEN2
6	GO:0099024	plasma membrane invagination	Biological Process	1	F1PBI6
7	GO:0015909	long-chain fatty acid transport	Biological Process	1	F1PBI6
7	GO:0009185	ribonucleoside diphosphate metabolic process	Biological Process	1	P52784
7	GO:0009126	purine nucleoside monophosphate metabolic process	Biological Process	2	P52784, Q0QEN2
7	GO:0043652	engulfment of apoptotic cell	Biological Process	1	F1PBI6
7	GO:0051258	protein polymerization	Biological Process	3	F1P8G0, F1PGS2, F1PBL4
7	GO:0006164	purine nucleotide biosynthetic process	Biological Process	1	Q0QEN2
7	GO:0035457	cellular response to interferon-alpha	Biological Process	1	F1PGC3
7	GO:0043154	negative regulation of cysteine-type endopeptidase activity involved in apoptotic process	Biological Process	1	F1PBI6
7	GO:0019935	cyclic-nucleotide-mediated signaling	Biological Process	1	F1PBI6
7	GO:0046939	nucleotide phosphorylation	Biological Process	1	P52784
7	GO:0097659	nucleic acid-templated transcription	Biological Process	3	E2RI99, E2RI13, J9NVE9
7	GO:0070372	regulation of ERK1 and ERK2 cascade	Biological Process	2	J9NVE9, F1PGS2
7	GO:0009187	cyclic nucleotide metabolic process	Biological Process	1	F1PBI6
7	GO:0042451	purine nucleoside biosynthetic process	Biological Process	1	Q0QEN2
7	GO:0070613	regulation of protein processing	Biological Process	1	F1PBI6
7	GO:0042310	vasoconstriction	Biological Process	1	F1PGS2
7	GO:0010955	negative regulation of protein processing	Biological Process	1	F1PBI6
7	GO:0052548	regulation of endopeptidase activity	Biological Process	1	F1PBI6
7	GO:0009260	ribonucleotide biosynthetic process	Biological Process	1	Q0QEN2
7	GO:1903508	positive regulation of nucleic acid-templated transcription	Biological Process	1	E2RI13
7	GO:0031638	zymogen activation	Biological Process	2	F1PBI6, F1PGS2
7	GO:0043406	positive regulation of MAP kinase activity	Biological Process	1	F1PBI6
7	GO:0018149	peptide cross-linking	Biological Process	1	F1PBI6
7	GO:0007045	cell-substrate adherens junction assembly	Biological Process	1	F1PBI6
7	GO:1903506	regulation of nucleic acid-templated transcription	Biological Process	3	E2RI99, E2RI13, J9NVE9
7	GO:0001934	positive regulation of protein phosphorylation	Biological Process	3	F1PBI6, J9NVE9, F1PGS2
7	GO:0007605	sensory perception of sound	Biological Process	1	J9NU17
7	GO:0042327	positive regulation of phosphorylation	Biological Process	3	F1PBI6, J9NVE9, F1PGS2
7	GO:1904035	regulation of epithelial cell apoptotic process	Biological Process	2	F1PBI6, F1PGS2
7	GO:0015672	monovalent inorganic cation transport	Biological Process	1	Q0QEN2
7	GO:0002576	platelet degranulation	Biological Process	1	F1PBI6
7	GO:1902042	negative regulation of extrinsic apoptotic signaling pathway via death domain receptors	Biological Process	1	F1PGS2
7	GO:1900542	regulation of purine nucleotide metabolic process	Biological Process	1	F1PBI6
7	GO:0006012	galactose metabolic process	Biological Process	1	P52784
7	GO:0006165	nucleoside diphosphate phosphorylation	Biological Process	1	P52784
7	GO:1903507	negative regulation of nucleic acid-templated transcription	Biological Process	1	J9NVE9
7	GO:0030799	regulation of cyclic nucleotide metabolic process	Biological Process	1	F1PBI6
7	GO:0009144	purine nucleoside triphosphate metabolic process	Biological Process	2	P52784, Q0QEN2
7	GO:0071451	cellular response to superoxide	Biological Process	1	F1PCG4
7	GO:0007178	transmembrane receptor protein serine/threonine kinase signaling pathway	Biological Process	1	F1PBI6
7	GO:0001932	regulation of protein phosphorylation	Biological Process	3	F1PBI6, J9NVE9, F1PGS2
7	GO:0043405	regulation of MAP kinase activity	Biological Process	1	F1PBI6
7	GO:1902600	hydrogen ion transmembrane transport	Biological Process	1	Q0QEN2
7	GO:0007263	nitric oxide mediated signal transduction	Biological Process	1	F1PBI6
7	GO:0033674	positive regulation of kinase activity	Biological Process	1	F1PBI6
7	GO:0008625	extrinsic apoptotic signaling pathway via death domain receptors	Biological Process	2	F1PBI6, F1PGS2
7	GO:0043281	regulation of cysteine-type endopeptidase activity involved in apoptotic process	Biological Process	1	F1PBI6
7	GO:0015991	ATP hydrolysis coupled proton transport	Biological Process	1	Q0QEN2
7	GO:0009135	purine nucleoside diphosphate metabolic process	Biological Process	1	P52784
7	GO:0070374	positive regulation of ERK1 and ERK2 cascade	Biological Process	2	J9NVE9, F1PGS2
7	GO:0032787	monocarboxylic acid metabolic process	Biological Process	1	P52784
7	GO:0009201	ribonucleoside triphosphate biosynthetic process	Biological Process	1	Q0QEN2
7	GO:1902043	positive regulation of extrinsic apoptotic signaling pathway via death domain receptors	Biological Process	1	F1PBI6
7	GO:0019319	hexose biosynthetic process	Biological Process	1	P52784
7	GO:0046128	purine ribonucleoside metabolic process	Biological Process	2	P52784, Q0QEN2
7	GO:0045197	establishment or maintenance of epithelial cell apical/basal polarity	Biological Process	1	J9NTJ3
7	GO:0098656	anion transmembrane transport	Biological Process	1	F1PBI6
7	GO:0046942	carboxylic acid transport	Biological Process	1	F1PBI6
7	GO:1904019	epithelial cell apoptotic process	Biological Process	2	F1PBI6, F1PGS2
7	GO:0010466	negative regulation of peptidase activity	Biological Process	1	F1PBI6
7	GO:0006953	acute-phase response	Biological Process	1	J9NVE9
7	GO:0006000	fructose metabolic process	Biological Process	1	P52784
7	GO:1905039	carboxylic acid transmembrane transport	Biological Process	1	F1PBI6
7	GO:0006468	protein phosphorylation	Biological Process	4	F1PBI6, J9NVE9, E2R5H4, F1PGS2
7	GO:0030072	peptide hormone secretion	Biological Process	1	F1PGS2
7	GO:0009127	purine nucleoside monophosphate biosynthetic process	Biological Process	1	Q0QEN2
7	GO:0042325	regulation of phosphorylation	Biological Process	3	F1PBI6, J9NVE9, F1PGS2
7	GO:0009746	response to hexose	Biological Process	1	F1PBI6
7	GO:0046496	nicotinamide nucleotide metabolic process	Biological Process	2	P52784, F1PPB6
7	GO:0009150	purine ribonucleotide metabolic process	Biological Process	3	P52784, F1PBI6, Q0QEN2
7	GO:1902041	regulation of extrinsic apoptotic signaling pathway via death domain receptors	Biological Process	2	F1PBI6, F1PGS2
7	GO:1903959	regulation of anion transmembrane transport	Biological Process	1	F1PBI6
7	GO:0009156	ribonucleoside monophosphate biosynthetic process	Biological Process	1	Q0QEN2
7	GO:0006013	mannose metabolic process	Biological Process	1	P52784
7	GO:0098660	inorganic ion transmembrane transport	Biological Process	1	Q0QEN2
7	GO:0043542	endothelial cell migration	Biological Process	1	F1PBI6
7	GO:0098655	cation transmembrane transport	Biological Process	1	Q0QEN2
7	GO:1904037	positive regulation of epithelial cell apoptotic process	Biological Process	1	F1PBI6
7	GO:1904036	negative regulation of epithelial cell apoptotic process	Biological Process	1	F1PGS2
7	GO:0070647	protein modification by small protein conjugation or removal	Biological Process	1	F1PN38
7	GO:0009199	ribonucleoside triphosphate metabolic process	Biological Process	2	P52784, Q0QEN2
7	GO:0009145	purine nucleoside triphosphate biosynthetic process	Biological Process	1	Q0QEN2
7	GO:0009161	ribonucleoside monophosphate metabolic process	Biological Process	2	P52784, Q0QEN2
7	GO:0015911	plasma membrane long-chain fatty acid transport	Biological Process	1	F1PBI6
7	GO:0042455	ribonucleoside biosynthetic process	Biological Process	1	Q0QEN2
7	GO:0007169	transmembrane receptor protein tyrosine kinase signaling pathway	Biological Process	1	F1PBI6
7	GO:0006006	glucose metabolic process	Biological Process	1	P52784
7	GO:0018193	peptidyl-amino acid modification	Biological Process	2	Q9MZD3, J9NVE9
7	GO:0045859	regulation of protein kinase activity	Biological Process	1	F1PBI6
8	GO:0015985	energy coupled proton transport, down electrochemical gradient	Biological Process	1	Q0QEN2
8	GO:0009168	purine ribonucleoside monophosphate biosynthetic process	Biological Process	1	Q0QEN2
8	GO:0045860	positive regulation of protein kinase activity	Biological Process	1	F1PBI6
8	GO:0010757	negative regulation of plasminogen activation	Biological Process	1	F1PBI6
8	GO:0019934	cGMP-mediated signaling	Biological Process	1	F1PBI6
8	GO:0018208	peptidyl-proline modification	Biological Process	1	Q9MZD3
8	GO:0030823	regulation of cGMP metabolic process	Biological Process	1	F1PBI6
8	GO:0000187	activation of MAPK activity	Biological Process	1	F1PBI6
8	GO:0033135	regulation of peptidyl-serine phosphorylation	Biological Process	1	J9NVE9
8	GO:0072577	endothelial cell apoptotic process	Biological Process	2	F1PBI6, F1PGS2
8	GO:0015718	monocarboxylic acid transport	Biological Process	1	F1PBI6
8	GO:0010951	negative regulation of endopeptidase activity	Biological Process	1	F1PBI6
8	GO:0071900	regulation of protein serine/threonine kinase activity	Biological Process	1	F1PBI6
8	GO:0009152	purine ribonucleotide biosynthetic process	Biological Process	1	Q0QEN2
8	GO:0009167	purine ribonucleoside monophosphate metabolic process	Biological Process	2	P52784, Q0QEN2
8	GO:0009206	purine ribonucleoside triphosphate biosynthetic process	Biological Process	1	Q0QEN2
8	GO:2000351	regulation of endothelial cell apoptotic process	Biological Process	2	F1PBI6, F1PGS2
8	GO:0006094	gluconeogenesis	Biological Process	1	P52784
8	GO:0018105	peptidyl-serine phosphorylation	Biological Process	1	J9NVE9
8	GO:0032446	protein modification by small protein conjugation	Biological Process	1	F1PN38
8	GO:2000352	negative regulation of endothelial cell apoptotic process	Biological Process	1	F1PGS2
8	GO:0043534	blood vessel endothelial cell migration	Biological Process	1	F1PBI6
8	GO:0031639	plasminogen activation	Biological Process	2	F1PBI6, F1PGS2
8	GO:0015988	energy coupled proton transmembrane transport, against electrochemical gradient	Biological Process	1	Q0QEN2
8	GO:0006739	NADP metabolic process	Biological Process	2	P52784, F1PPB6
8	GO:0046031	ADP metabolic process	Biological Process	1	P52784
8	GO:0006090	pyruvate metabolic process	Biological Process	1	P52784
8	GO:0098662	inorganic cation transmembrane transport	Biological Process	1	Q0QEN2
8	GO:0018209	peptidyl-serine modification	Biological Process	1	J9NVE9
8	GO:0009179	purine ribonucleoside diphosphate metabolic process	Biological Process	1	P52784
8	GO:2000116	regulation of cysteine-type endopeptidase activity	Biological Process	1	F1PBI6
8	GO:0046068	cGMP metabolic process	Biological Process	1	F1PBI6
8	GO:2000353	positive regulation of endothelial cell apoptotic process	Biological Process	1	F1PBI6
8	GO:0009749	response to glucose	Biological Process	1	F1PBI6
8	GO:0046129	purine ribonucleoside biosynthetic process	Biological Process	1	Q0QEN2
8	GO:0010755	regulation of plasminogen activation	Biological Process	1	F1PBI6
8	GO:0033138	positive regulation of peptidyl-serine phosphorylation	Biological Process	1	J9NVE9
8	GO:0046034	ATP metabolic process	Biological Process	2	P52784, Q0QEN2
8	GO:0009205	purine ribonucleoside triphosphate metabolic process	Biological Process	2	P52784, Q0QEN2
9	GO:2000117	negative regulation of cysteine-type endopeptidase activity	Biological Process	1	F1PBI6
9	GO:0006754	ATP biosynthetic process	Biological Process	1	Q0QEN2
9	GO:0000413	protein peptidyl-prolyl isomerization	Biological Process	1	Q9MZD3
9	GO:0071902	positive regulation of protein serine/threonine kinase activity	Biological Process	1	F1PBI6
9	GO:0015986	ATP synthesis coupled proton transport	Biological Process	1	Q0QEN2
9	GO:0016567	protein ubiquitination	Biological Process	1	F1PN38
9	GO:0032147	activation of protein kinase activity	Biological Process	1	F1PBI6

## Sheet: mf
Level	GO ID	Term	GO Type	#Seqs	Sequence Names
1	GO:0003674	molecular_function	Molecular Function	46	E2RI99, E2RI13, F1PN38, F1Q432, J9JHZ3, F1PBL4, F1PE38, J9NTJ3, J9NYN2, J9NU17, J9JHF7, F1PPB6, J9PB81, F1P8G0, F1P9M6, F1P865, J9NVT1, E2RQF8, F5XVB0, P52784, F1PCG4, P60529, F1PBI6, E2RH23, F1P8A6, F1PBK6, Q9MZD3, F1PGS2, C0LQL0, E2RRU2, E2RP87, E2RIG8, J9P0D4, E2QW34, J9NWQ5, J9P716, F1PF31, Q0QEN2, E2QSF4, E2R5H4, F1P8V6, F1PGC3, F1P6P2, F6X870, P60524, F1PTS8
2	GO:0005215	transporter activity	Molecular Function	2	Q0QEN2, F1P865
2	GO:0005198	structural molecule activity	Molecular Function	4	J9P716, E2QSF4, F1PGS2, F1PTS8
2	GO:0004871	signal transducer activity	Molecular Function	1	E2RI99
2	GO:0001071	nucleic acid binding transcription factor activity	Molecular Function	2	E2RI99, E2RI13
2	GO:0003824	catalytic activity	Molecular Function	15	F1PCG4, P52784, F1PBK6, Q9MZD3, F1PN38, E2RRU2, E2QW34, J9NU17, F1PPB6, J9P716, J9PB81, Q0QEN2, E2QSF4, E2R5H4, F6X870
2	GO:0005488	binding	Molecular Function	37	E2RI99, F1PN38, F1Q432, J9JHZ3, F1PE38, F1PBL4, J9NYN2, J9NTJ3, J9NU17, J9JHF7, F1P8G0, F1P9M6, J9NVT1, E2RQF8, F5XVB0, P52784, P60529, F1PBI6, E2RH23, F1P8A6, F1PBK6, F1PGS2, C0LQL0, E2RP87, E2RIG8, J9P0D4, J9NWQ5, J9P716, F1PF31, Q0QEN2, E2QSF4, E2R5H4, F1P8V6, F1P6P2, F1PGC3, F6X870, P60524
2	GO:0016209	antioxidant activity	Molecular Function	1	F1PCG4
3	GO:0016829	lyase activity	Molecular Function	2	F1PBK6, F1PPB6
3	GO:0072341	modified amino acid binding	Molecular Function	1	F1PBI6
3	GO:0019825	oxygen binding	Molecular Function	5	P60529, J9JHF7, F1P8V6, J9JHZ3, P60524
3	GO:1901681	sulfur compound binding	Molecular Function	1	F1PBI6
3	GO:0022892	substrate-specific transporter activity	Molecular Function	2	Q0QEN2, F1P865
3	GO:0016491	oxidoreductase activity	Molecular Function	2	F1PCG4, F6X870
3	GO:0016853	isomerase activity	Molecular Function	1	Q9MZD3
3	GO:0005200	structural constituent of cytoskeleton	Molecular Function	2	J9P716, E2QSF4
3	GO:0050840	extracellular matrix binding	Molecular Function	1	F1PBI6
3	GO:0008289	lipid binding	Molecular Function	2	F1PBI6, C0LQL0
3	GO:0044877	macromolecular complex binding	Molecular Function	2	F1PBI6, F5XVB0
3	GO:0016740	transferase activity	Molecular Function	3	P52784, F1PN38, E2R5H4
3	GO:0016787	hydrolase activity	Molecular Function	8	E2QW34, J9NU17, F1PBK6, J9P716, J9PB81, Q0QEN2, E2QSF4, E2RRU2
3	GO:0022857	transmembrane transporter activity	Molecular Function	2	Q0QEN2, F1P865
3	GO:0043167	ion binding	Molecular Function	11	J9NYN2, E2RH23, F1PBI6, P60529, J9NWQ5, J9JHF7, F1PBK6, C0LQL0, J9JHZ3, F1PE38, P60524
3	GO:0005515	protein binding	Molecular Function	26	F1PN38, F1Q432, F1PE38, F1PBL4, J9NTJ3, J9NU17, F1P8G0, F1P9M6, J9NVT1, E2RQF8, F5XVB0, P52784, F1PBI6, E2RH23, F1P8A6, F1PBK6, F1PGS2, C0LQL0, E2RP87, J9P0D4, J9NWQ5, F1PF31, F1P6P2, E2R5H4, F1PGC3, F6X870
3	GO:0004601	peroxidase activity	Molecular Function	1	F1PCG4
3	GO:0003700	transcription factor activity, sequence-specific DNA binding	Molecular Function	2	E2RI99, E2RI13
3	GO:0097367	carbohydrate derivative binding	Molecular Function	8	P52784, E2RIG8, F1PBI6, J9NU17, J9P716, Q0QEN2, E2QSF4, E2R5H4
3	GO:0036094	small molecule binding	Molecular Function	7	P52784, E2RIG8, J9NU17, J9P716, Q0QEN2, E2QSF4, E2R5H4
3	GO:1901363	heterocyclic compound binding	Molecular Function	14	P52784, E2RI99, P60529, J9JHZ3, E2RIG8, J9JHF7, J9NU17, J9P716, Q0QEN2, E2QSF4, F1P8V6, F1PGC3, E2R5H4, P60524
3	GO:0051920	peroxiredoxin activity	Molecular Function	1	F1PCG4
3	GO:0097159	organic cyclic compound binding	Molecular Function	14	P52784, E2RI99, P60529, J9JHZ3, E2RIG8, J9JHF7, J9NU17, J9P716, Q0QEN2, E2QSF4, F1P8V6, F1PGC3, E2R5H4, P60524
3	GO:0060090	binding, bridging	Molecular Function	3	F1P8G0, F1PGS2, F1PBL4
4	GO:0051087	chaperone binding	Molecular Function	1	F1PGS2
4	GO:0005504	fatty acid binding	Molecular Function	1	C0LQL0
4	GO:0016705	oxidoreductase activity, acting on paired donors, with incorporation or reduction of molecular oxygen	Molecular Function	1	F6X870
4	GO:0005539	glycosaminoglycan binding	Molecular Function	1	F1PBI6
4	GO:0016817	hydrolase activity, acting on acid anhydrides	Molecular Function	4	J9NU17, J9P716, Q0QEN2, E2QSF4
4	GO:0001882	nucleoside binding	Molecular Function	7	P52784, E2RIG8, J9NU17, J9P716, Q0QEN2, E2QSF4, E2R5H4
4	GO:0008092	cytoskeletal protein binding	Molecular Function	2	J9NTJ3, C0LQL0
4	GO:0046983	protein dimerization activity	Molecular Function	1	F1PE38
4	GO:0046906	tetrapyrrole binding	Molecular Function	5	P60529, J9JHF7, F1P8V6, J9JHZ3, P60524
4	GO:0001948	glycoprotein binding	Molecular Function	1	F1PBI6
4	GO:0043168	anion binding	Molecular Function	1	C0LQL0
4	GO:0016830	carbon-carbon lyase activity	Molecular Function	1	F1PPB6
4	GO:1901265	nucleoside phosphate binding	Molecular Function	7	P52784, E2RIG8, J9NU17, J9P716, Q0QEN2, E2QSF4, E2R5H4
4	GO:0042802	identical protein binding	Molecular Function	1	F1PE38
4	GO:0016859	cis-trans isomerase activity	Molecular Function	1	Q9MZD3
4	GO:0008233	peptidase activity	Molecular Function	2	E2QW34, J9PB81
4	GO:0005543	phospholipid binding	Molecular Function	1	F1PBI6
4	GO:0032403	protein complex binding	Molecular Function	2	F1PBI6, F5XVB0
4	GO:0016772	transferase activity, transferring phosphorus-containing groups	Molecular Function	2	P52784, E2R5H4
4	GO:0050839	cell adhesion molecule binding	Molecular Function	2	F1PBI6, F1PGS2
4	GO:0005102	receptor binding	Molecular Function	5	F1PBI6, F1P8G0, C0LQL0, F1PGS2, F1PBL4
4	GO:0016684	oxidoreductase activity, acting on peroxide as acceptor	Molecular Function	1	F1PCG4
4	GO:0000166	nucleotide binding	Molecular Function	7	P52784, E2RIG8, J9NU17, J9P716, Q0QEN2, E2QSF4, E2R5H4
4	GO:0016835	carbon-oxygen lyase activity	Molecular Function	1	F1PBK6
4	GO:0019838	growth factor binding	Molecular Function	1	F1PBI6
4	GO:0030674	protein binding, bridging	Molecular Function	3	F1P8G0, F1PGS2, F1PBL4
4	GO:0043169	cation binding	Molecular Function	11	J9NYN2, F1PBI6, P60529, E2RH23, J9NWQ5, J9JHF7, F1PBK6, C0LQL0, J9JHZ3, F1PE38, P60524
4	GO:0019787	ubiquitin-like protein transferase activity	Molecular Function	1	F1PN38
4	GO:0008379	thioredoxin peroxidase activity	Molecular Function	1	F1PCG4
4	GO:0004497	monooxygenase activity	Molecular Function	1	F6X870
4	GO:0001786	phosphatidylserine binding	Molecular Function	1	F1PBI6
4	GO:0017171	serine hydrolase activity	Molecular Function	1	J9PB81
4	GO:0016788	hydrolase activity, acting on ester bonds	Molecular Function	1	F1PBK6
4	GO:0043236	laminin binding	Molecular Function	1	F1PBI6
4	GO:0001968	fibronectin binding	Molecular Function	1	F1PBI6
4	GO:0032553	ribonucleotide binding	Molecular Function	7	P52784, E2RIG8, J9NU17, J9P716, Q0QEN2, E2QSF4, E2R5H4
4	GO:0019955	cytokine binding	Molecular Function	1	F1PBI6
4	GO:0071814	protein-lipid complex binding	Molecular Function	1	F1PBI6
4	GO:0022804	active transmembrane transporter activity	Molecular Function	1	Q0QEN2
4	GO:0008201	heparin binding	Molecular Function	1	F1PBI6
4	GO:0003676	nucleic acid binding	Molecular Function	2	E2RI99, F1PGC3
4	GO:0022891	substrate-specific transmembrane transporter activity	Molecular Function	2	Q0QEN2, F1P865
5	GO:0003677	DNA binding	Molecular Function	1	E2RI99
5	GO:0017076	purine nucleotide binding	Molecular Function	7	P52784, E2RIG8, J9NU17, J9P716, Q0QEN2, E2QSF4, E2R5H4
5	GO:0005518	collagen binding	Molecular Function	1	F1PBI6
5	GO:0015399	primary active transmembrane transporter activity	Molecular Function	1	Q0QEN2
5	GO:0015075	ion transmembrane transporter activity	Molecular Function	2	Q0QEN2, F1P865
5	GO:0005178	integrin binding	Molecular Function	1	F1PBI6
5	GO:0001883	purine nucleoside binding	Molecular Function	7	P52784, E2RIG8, J9NU17, J9P716, Q0QEN2, E2QSF4, E2R5H4
5	GO:0015631	tubulin binding	Molecular Function	2	J9NTJ3, C0LQL0
5	GO:0046872	metal ion binding	Molecular Function	11	J9NYN2, F1PBI6, P60529, E2RH23, J9NWQ5, J9JHF7, F1PBK6, C0LQL0, J9JHZ3, F1PE38, P60524
5	GO:0052689	carboxylic ester hydrolase activity	Molecular Function	1	F1PBK6
5	GO:0071813	lipoprotein particle binding	Molecular Function	1	F1PBI6
5	GO:0016832	aldehyde-lyase activity	Molecular Function	1	F1PPB6
5	GO:0016820	hydrolase activity, acting on acid anhydrides, catalyzing transmembrane movement of substances	Molecular Function	1	Q0QEN2
5	GO:0016773	phosphotransferase activity, alcohol group as acceptor	Molecular Function	2	P52784, E2R5H4
5	GO:0042803	protein homodimerization activity	Molecular Function	1	F1PE38
5	GO:0003723	RNA binding	Molecular Function	1	F1PGC3
5	GO:0036041	long-chain fatty acid binding	Molecular Function	1	C0LQL0
5	GO:0043394	proteoglycan binding	Molecular Function	1	F1PBI6
5	GO:0016301	kinase activity	Molecular Function	2	P52784, E2R5H4
5	GO:0022853	active ion transmembrane transporter activity	Molecular Function	1	Q0QEN2
5	GO:0035325	Toll-like receptor binding	Molecular Function	1	C0LQL0
5	GO:0070051	fibrinogen binding	Molecular Function	1	F1PBI6
5	GO:0020037	heme binding	Molecular Function	5	P60529, J9JHF7, F1P8V6, J9JHZ3, P60524
5	GO:0016715	oxidoreductase activity, acting on paired donors, with incorporation or reduction of molecular oxygen, reduced ascorbate as one donor, and incorporation of one atom of oxygen	Molecular Function	1	F6X870
5	GO:0008236	serine-type peptidase activity	Molecular Function	1	J9PB81
5	GO:0016818	hydrolase activity, acting on acid anhydrides, in phosphorus-containing anhydrides	Molecular Function	4	J9NU17, J9P716, Q0QEN2, E2QSF4
5	GO:0035639	purine ribonucleoside triphosphate binding	Molecular Function	7	P52784, E2RIG8, J9NU17, J9P716, Q0QEN2, E2QSF4, E2R5H4
5	GO:0016836	hydro-lyase activity	Molecular Function	1	F1PBK6
5	GO:0032549	ribonucleoside binding	Molecular Function	7	P52784, E2RIG8, J9NU17, J9P716, Q0QEN2, E2QSF4, E2R5H4
5	GO:0032555	purine ribonucleotide binding	Molecular Function	7	P52784, E2RIG8, J9NU17, J9P716, Q0QEN2, E2QSF4, E2R5H4
5	GO:0070011	peptidase activity, acting on L-amino acid peptides	Molecular Function	2	E2QW34, J9PB81
5	GO:0017134	fibroblast growth factor binding	Molecular Function	1	F1PBI6
5	GO:0004842	ubiquitin-protein transferase activity	Molecular Function	1	F1PN38
5	GO:0050431	transforming growth factor beta binding	Molecular Function	1	F1PBI6
5	GO:0031406	carboxylic acid binding	Molecular Function	1	C0LQL0
5	GO:0003755	peptidyl-prolyl cis-trans isomerase activity	Molecular Function	1	Q9MZD3
5	GO:0050786	RAGE receptor binding	Molecular Function	1	C0LQL0
6	GO:0004139	deoxyribose-phosphate aldolase activity	Molecular Function	1	F1PPB6
6	GO:0005524	ATP binding	Molecular Function	4	P52784, J9NU17, Q0QEN2, E2R5H4
6	GO:0050543	icosatetraenoic acid binding	Molecular Function	1	C0LQL0
6	GO:0070052	collagen V binding	Molecular Function	1	F1PBI6
6	GO:0032561	guanyl ribonucleotide binding	Molecular Function	3	E2RIG8, J9P716, E2QSF4
6	GO:0019001	guanyl nucleotide binding	Molecular Function	3	E2RIG8, J9P716, E2QSF4
6	GO:0004064	arylesterase activity	Molecular Function	1	F1PBK6
6	GO:0008443	phosphofructokinase activity	Molecular Function	1	P52784
6	GO:0050542	icosanoid binding	Molecular Function	1	C0LQL0
6	GO:0042625	ATPase coupled ion transmembrane transporter activity	Molecular Function	1	Q0QEN2
6	GO:0008017	microtubule binding	Molecular Function	2	J9NTJ3, C0LQL0
6	GO:0030554	adenyl nucleotide binding	Molecular Function	4	P52784, J9NU17, Q0QEN2, E2R5H4
6	GO:0008324	cation transmembrane transporter activity	Molecular Function	1	Q0QEN2
6	GO:0019200	carbohydrate kinase activity	Molecular Function	1	P52784
6	GO:0035662	Toll-like receptor 4 binding	Molecular Function	1	C0LQL0
6	GO:0004175	endopeptidase activity	Molecular Function	2	E2QW34, J9PB81
6	GO:0004252	serine-type endopeptidase activity	Molecular Function	1	J9PB81
6	GO:0005525	GTP binding	Molecular Function	3	E2RIG8, J9P716, E2QSF4
6	GO:0032559	adenyl ribonucleotide binding	Molecular Function	4	P52784, J9NU17, Q0QEN2, E2R5H4
6	GO:0042626	ATPase activity, coupled to transmembrane movement of substances	Molecular Function	1	Q0QEN2
6	GO:0016462	pyrophosphatase activity	Molecular Function	4	J9NU17, J9P716, Q0QEN2, E2QSF4
6	GO:0046914	transition metal ion binding	Molecular Function	8	J9NYN2, P60529, E2RH23, J9JHF7, F1PBK6, J9JHZ3, C0LQL0, P60524
6	GO:0070003	threonine-type peptidase activity	Molecular Function	1	E2QW34
6	GO:0005509	calcium ion binding	Molecular Function	4	F1PBI6, J9NWQ5, C0LQL0, F1PE38
6	GO:0004089	carbonate dehydratase activity	Molecular Function	1	F1PBK6
6	GO:0015405	P-P-bond-hydrolysis-driven transmembrane transporter activity	Molecular Function	1	Q0QEN2
6	GO:0030169	low-density lipoprotein particle binding	Molecular Function	1	F1PBI6
6	GO:0033293	monocarboxylic acid binding	Molecular Function	1	C0LQL0
6	GO:0004672	protein kinase activity	Molecular Function	1	E2R5H4
6	GO:0032550	purine ribonucleoside binding	Molecular Function	7	P52784, E2RIG8, J9NU17, J9P716, Q0QEN2, E2QSF4, E2R5H4
7	GO:0022890	inorganic cation transmembrane transporter activity	Molecular Function	1	Q0QEN2
7	GO:0005506	iron ion binding	Molecular Function	4	P60529, J9JHF7, J9JHZ3, P60524
7	GO:0050544	arachidonic acid binding	Molecular Function	1	C0LQL0
7	GO:0044769	ATPase activity, coupled to transmembrane movement of ions, rotational mechanism	Molecular Function	1	Q0QEN2
7	GO:0004298	threonine-type endopeptidase activity	Molecular Function	1	E2QW34
7	GO:0019829	cation-transporting ATPase activity	Molecular Function	1	Q0QEN2
7	GO:0003872	6-phosphofructokinase activity	Molecular Function	1	P52784
7	GO:0008270	zinc ion binding	Molecular Function	4	J9NYN2, E2RH23, F1PBK6, C0LQL0
7	GO:0017111	nucleoside-triphosphatase activity	Molecular Function	4	J9NU17, J9P716, Q0QEN2, E2QSF4
8	GO:0016887	ATPase activity	Molecular Function	1	Q0QEN2
8	GO:0003774	motor activity	Molecular Function	1	J9NU17
8	GO:0015077	monovalent inorganic cation transmembrane transporter activity	Molecular Function	1	Q0QEN2
8	GO:0003924	GTPase activity	Molecular Function	2	J9P716, E2QSF4
8	GO:0046933	proton-transporting ATP synthase activity, rotational mechanism	Molecular Function	1	Q0QEN2
9	GO:0042623	ATPase activity, coupled	Molecular Function	1	Q0QEN2
9	GO:0015078	hydrogen ion transmembrane transporter activity	Molecular Function	1	Q0QEN2
10	GO:0043492	ATPase activity, coupled to movement of substances	Molecular Function	1	Q0QEN2

## Sheet: cc
Level	GO ID	Term	GO Type	#Seqs	Sequence Names
1	GO:0005575	cellular_component	Cellular Component	43	E2RI99, E2RI13, F1PN38, J9NVE9, F1Q432, J9JHZ3, F1PBL4, F1PE38, J9NTJ3, J9NYN2, J9NU17, J9JHF7, F1PPB6, J9PB81, F1PDY8, F1P8G0, F1P865, E2RQF8, F5XVB0, P52784, F1PBI6, E2RH23, P60529, F1P8A6, F1PBK6, Q9MZD3, F1PGS2, C0LQL0, E2RP87, E2RRU2, E2RIG8, E2QW34, J9NWQ5, J9NZW6, F1PF31, J9P716, Q0QEN2, J9P6T6, E2QSF4, F1P6P2, F6X870, P60524, F1PTS8
2	GO:0043226	organelle	Cellular Component	21	F1PBI6, E2RI99, E2RH23, F1PBK6, E2RI13, Q9MZD3, F1PN38, C0LQL0, F1PGS2, J9NYN2, J9NTJ3, J9NWQ5, J9NU17, J9P716, Q0QEN2, J9PB81, E2QSF4, J9P6T6, F1P6P2, F5XVB0, F1PTS8
2	GO:0099080	supramolecular complex	Cellular Component	4	J9NU17, J9P716, E2QSF4, F1PTS8
2	GO:0044425	membrane part	Cellular Component	6	J9NTJ3, F1PBI6, J9NU17, J9NZW6, Q0QEN2, F1PGS2
2	GO:0032991	macromolecular complex	Cellular Component	16	P52784, F1PBI6, E2RI99, P60529, E2RI13, C0LQL0, F1PGS2, J9JHZ3, F1PBL4, J9NTJ3, E2QW34, J9NU17, J9JHF7, Q0QEN2, F1P8G0, P60524
2	GO:0005623	cell	Cellular Component	30	E2RI99, E2RI13, F1PN38, J9JHZ3, F1PBL4, F1PE38, J9NTJ3, J9NU17, J9JHF7, F1PPB6, J9PB81, F1PDY8, F1P8G0, P52784, F1PBI6, P60529, E2RH23, F1PBK6, Q9MZD3, C0LQL0, F1PGS2, E2RIG8, E2QW34, J9NWQ5, J9P716, Q0QEN2, E2QSF4, J9P6T6, P60524, F1PTS8
2	GO:0005576	extracellular region	Cellular Component	11	F1PBI6, F1PBK6, F1PF31, J9NVE9, F1Q432, F1P8G0, F1PGS2, E2RQF8, F5XVB0, F1PBL4, E2RRU2
2	GO:0016020	membrane	Cellular Component	11	J9NTJ3, F1PBI6, J9NU17, F1P8A6, J9NZW6, Q0QEN2, F1P865, F1PGS2, F6X870, F1PE38, E2RP87
2	GO:0031974	membrane-enclosed lumen	Cellular Component	2	F1PBI6, E2RI99
2	GO:0044464	cell part	Cellular Component	30	E2RI99, E2RI13, F1PN38, J9JHZ3, F1PBL4, F1PE38, J9NTJ3, J9NU17, J9JHF7, F1PPB6, J9PB81, F1PDY8, F1P8G0, P52784, F1PBI6, P60529, E2RH23, F1PBK6, Q9MZD3, C0LQL0, F1PGS2, E2RIG8, E2QW34, J9NWQ5, J9P716, Q0QEN2, E2QSF4, J9P6T6, P60524, F1PTS8
2	GO:0044421	extracellular region part	Cellular Component	10	F1PBI6, F1PBK6, F1PF31, F1Q432, F1P8G0, F1PGS2, E2RQF8, F5XVB0, F1PBL4, E2RRU2
2	GO:0044422	organelle part	Cellular Component	9	J9NTJ3, F1PBI6, E2RI99, J9NU17, J9P716, Q0QEN2, E2QSF4, C0LQL0, F1PTS8
3	GO:0098796	membrane protein complex	Cellular Component	2	F1PBI6, Q0QEN2
3	GO:0005886	plasma membrane	Cellular Component	4	J9NTJ3, F1PBI6, J9NU17, F1PGS2
3	GO:0012505	endomembrane system	Cellular Component	2	F1PBI6, F1PGS2
3	GO:0043230	extracellular organelle	Cellular Component	3	F1PBI6, F1PBK6, F1PGS2
3	GO:0005615	extracellular space	Cellular Component	5	F1PBI6, F1P8G0, F1PGS2, E2RQF8, F1PBL4
3	GO:0043234	protein complex	Cellular Component	16	P52784, F1PBI6, E2RI99, P60529, E2RI13, C0LQL0, F1PGS2, J9JHZ3, F1PBL4, J9NTJ3, E2QW34, J9NU17, J9JHF7, Q0QEN2, F1P8G0, P60524
3	GO:0043229	intracellular organelle	Cellular Component	16	F1PBI6, E2RI99, E2RH23, E2RI13, F1PN38, F1PGS2, C0LQL0, J9NTJ3, J9NU17, J9NWQ5, J9P716, Q0QEN2, J9PB81, E2QSF4, J9P6T6, F1PTS8
3	GO:1903561	extracellular vesicle	Cellular Component	3	F1PBI6, F1PBK6, F1PGS2
3	GO:0043233	organelle lumen	Cellular Component	2	F1PBI6, E2RI99
3	GO:0098862	cluster of actin-based cell projections	Cellular Component	1	J9NU17
3	GO:0044446	intracellular organelle part	Cellular Component	9	J9NTJ3, F1PBI6, E2RI99, J9NU17, J9P716, Q0QEN2, E2QSF4, C0LQL0, F1PTS8
3	GO:0009986	cell surface	Cellular Component	2	F1PBI6, F1PGS2
3	GO:0005577	fibrinogen complex	Cellular Component	4	F1PBI6, F1P8G0, F1PGS2, F1PBL4
3	GO:0098590	plasma membrane region	Cellular Component	2	J9NTJ3, J9NU17
3	GO:0044459	plasma membrane part	Cellular Component	4	J9NTJ3, F1PBI6, J9NU17, F1PGS2
3	GO:0043227	membrane-bounded organelle	Cellular Component	13	F1PBI6, E2RI99, E2RH23, F1PBK6, E2RI13, Q9MZD3, F1PGS2, J9NYN2, Q0QEN2, J9PB81, J9P6T6, F1P6P2, F5XVB0
3	GO:0005622	intracellular	Cellular Component	26	E2RI99, E2RI13, F1PN38, J9JHZ3, J9NTJ3, J9JHF7, J9NU17, F1PPB6, J9PB81, P52784, P60529, F1PBI6, E2RH23, F1PBK6, Q9MZD3, C0LQL0, F1PGS2, E2RIG8, E2QW34, J9NWQ5, J9P716, Q0QEN2, E2QSF4, J9P6T6, P60524, F1PTS8
3	GO:0044424	intracellular part	Cellular Component	25	E2RI99, E2RI13, F1PN38, J9JHZ3, J9NTJ3, J9JHF7, J9NU17, F1PPB6, J9PB81, P52784, P60529, F1PBI6, E2RH23, F1PBK6, Q9MZD3, C0LQL0, F1PGS2, E2QW34, J9NWQ5, J9P716, Q0QEN2, E2QSF4, J9P6T6, P60524, F1PTS8
3	GO:0072562	blood microparticle	Cellular Component	1	F1PGS2
3	GO:0031012	extracellular matrix	Cellular Component	4	F1PBI6, F1PF31, F1Q432, F5XVB0
3	GO:0042995	cell projection	Cellular Component	1	J9NU17
3	GO:0071944	cell periphery	Cellular Component	4	J9NTJ3, F1PBI6, J9NU17, F1PGS2
3	GO:0099081	supramolecular polymer	Cellular Component	4	J9NU17, J9P716, E2QSF4, F1PTS8
3	GO:0043228	non-membrane-bounded organelle	Cellular Component	6	J9NTJ3, J9NU17, J9P716, E2QSF4, C0LQL0, F1PTS8
3	GO:0031224	intrinsic component of membrane	Cellular Component	2	F1PBI6, J9NZW6
3	GO:0070062	extracellular exosome	Cellular Component	3	F1PBI6, F1PBK6, F1PGS2
3	GO:0098552	side of membrane	Cellular Component	2	F1PBI6, F1PGS2
4	GO:0005903	brush border	Cellular Component	1	J9NU17
4	GO:0005578	proteinaceous extracellular matrix	Cellular Component	2	F1Q432, F5XVB0
4	GO:0098858	actin-based cell projection	Cellular Component	1	J9NU17
4	GO:0099512	supramolecular fiber	Cellular Component	4	J9NU17, J9P716, E2QSF4, F1PTS8
4	GO:0005737	cytoplasm	Cellular Component	14	P52784, F1PBI6, P60529, F1PBK6, Q9MZD3, F1PN38, F1PGS2, J9JHZ3, J9NU17, J9JHF7, F1PPB6, Q0QEN2, J9PB81, P60524
4	GO:1902494	catalytic complex	Cellular Component	2	P52784, E2QW34
4	GO:0044432	endoplasmic reticulum part	Cellular Component	1	F1PBI6
4	GO:0016327	apicolateral plasma membrane	Cellular Component	1	J9NTJ3
4	GO:0044444	cytoplasmic part	Cellular Component	9	P52784, F1PBI6, P60529, J9NU17, J9JHF7, Q0QEN2, F1PGS2, J9JHZ3, P60524
4	GO:0005667	transcription factor complex	Cellular Component	2	E2RI99, E2RI13
4	GO:0005839	proteasome core complex	Cellular Component	1	E2QW34
4	GO:0016021	integral component of membrane	Cellular Component	2	F1PBI6, J9NZW6
4	GO:0005938	cell cortex	Cellular Component	1	J9NU17
4	GO:0098797	plasma membrane protein complex	Cellular Component	1	F1PBI6
4	GO:0043231	intracellular membrane-bounded organelle	Cellular Component	8	F1PBI6, E2RI99, E2RH23, E2RI13, Q0QEN2, J9PB81, J9P6T6, F1PGS2
4	GO:0031982	vesicle	Cellular Component	4	F1PBI6, F1PBK6, F1P6P2, F1PGS2
4	GO:0009897	external side of plasma membrane	Cellular Component	2	F1PBI6, F1PGS2
4	GO:0031226	intrinsic component of plasma membrane	Cellular Component	1	F1PBI6
4	GO:0043232	intracellular non-membrane-bounded organelle	Cellular Component	6	J9NTJ3, J9NU17, J9P716, E2QSF4, C0LQL0, F1PTS8
4	GO:0031941	filamentous actin	Cellular Component	1	J9NU17
4	GO:0016459	myosin complex	Cellular Component	1	J9NU17
4	GO:0005783	endoplasmic reticulum	Cellular Component	1	F1PBI6
4	GO:0033178	proton-transporting two-sector ATPase complex, catalytic domain	Cellular Component	1	Q0QEN2
4	GO:0044428	nuclear part	Cellular Component	1	E2RI99
4	GO:0031983	vesicle lumen	Cellular Component	1	F1PBI6
4	GO:0044430	cytoskeletal part	Cellular Component	6	J9NTJ3, J9NU17, J9P716, E2QSF4, C0LQL0, F1PTS8
4	GO:0044429	mitochondrial part	Cellular Component	1	Q0QEN2
4	GO:0045259	proton-transporting ATP synthase complex	Cellular Component	1	Q0QEN2
4	GO:0045298	tubulin complex	Cellular Component	2	J9NTJ3, C0LQL0
4	GO:0098636	protein complex involved in cell adhesion	Cellular Component	1	F1PBI6
4	GO:0044433	cytoplasmic vesicle part	Cellular Component	1	F1PBI6
4	GO:0005887	integral component of plasma membrane	Cellular Component	1	F1PBI6
4	GO:0043235	receptor complex	Cellular Component	1	F1PBI6
4	GO:0070013	intracellular organelle lumen	Cellular Component	2	F1PBI6, E2RI99
4	GO:0005833	hemoglobin complex	Cellular Component	4	P60529, J9JHF7, J9JHZ3, P60524
4	GO:0000502	proteasome complex	Cellular Component	1	E2QW34
4	GO:0030141	secretory granule	Cellular Component	2	F1PBI6, F1PGS2
4	GO:0098802	plasma membrane receptor complex	Cellular Component	1	F1PBI6
4	GO:0016328	lateral plasma membrane	Cellular Component	2	J9NTJ3, J9NU17
4	GO:0016469	proton-transporting two-sector ATPase complex	Cellular Component	1	Q0QEN2
4	GO:0016323	basolateral plasma membrane	Cellular Component	1	J9NU17
4	GO:0097708	intracellular vesicle	Cellular Component	2	F1PBI6, F1PGS2
5	GO:0008305	integrin complex	Cellular Component	1	F1PBI6
5	GO:0044445	cytosolic part	Cellular Component	5	P52784, P60529, J9JHF7, J9JHZ3, P60524
5	GO:1905368	peptidase complex	Cellular Component	1	E2QW34
5	GO:0097427	microtubule bundle	Cellular Component	1	J9NTJ3
5	GO:0031988	membrane-bounded vesicle	Cellular Component	3	F1PBI6, F1PBK6, F1PGS2
5	GO:0031410	cytoplasmic vesicle	Cellular Component	2	F1PBI6, F1PGS2
5	GO:0044448	cell cortex part	Cellular Component	1	J9NU17
5	GO:0030864	cortical actin cytoskeleton	Cellular Component	1	J9NU17
5	GO:0060205	cytoplasmic membrane-bounded vesicle lumen	Cellular Component	1	F1PBI6
5	GO:0099513	polymeric cytoskeletal fiber	Cellular Component	4	J9NU17, J9P716, E2QSF4, F1PTS8
5	GO:0005902	microvillus	Cellular Component	1	J9NU17
5	GO:0005634	nucleus	Cellular Component	4	E2RI99, E2RH23, E2RI13, J9P6T6
5	GO:0005788	endoplasmic reticulum lumen	Cellular Component	1	F1PBI6
5	GO:1990234	transferase complex	Cellular Component	1	P52784
5	GO:0016023	cytoplasmic, membrane-bounded vesicle	Cellular Component	2	F1PBI6, F1PGS2
5	GO:0099568	cytoplasmic region	Cellular Component	1	J9NU17
5	GO:0005829	cytosol	Cellular Component	5	P52784, P60529, J9JHF7, J9JHZ3, P60524
5	GO:0005856	cytoskeleton	Cellular Component	6	J9NTJ3, J9NU17, J9P716, E2QSF4, C0LQL0, F1PTS8
5	GO:0005739	mitochondrion	Cellular Component	1	Q0QEN2
5	GO:0031091	platelet alpha granule	Cellular Component	2	F1PBI6, F1PGS2
5	GO:0034774	secretory granule lumen	Cellular Component	1	F1PBI6
5	GO:0031981	nuclear lumen	Cellular Component	1	E2RI99
6	GO:0099503	secretory vesicle	Cellular Component	2	F1PBI6, F1PGS2
6	GO:0061695	transferase complex, transferring phosphorus-containing groups	Cellular Component	1	P52784
6	GO:0005884	actin filament	Cellular Component	1	J9NU17
6	GO:0030863	cortical cytoskeleton	Cellular Component	1	J9NU17
6	GO:0005945	6-phosphofructokinase complex	Cellular Component	1	P52784
6	GO:0015630	microtubule cytoskeleton	Cellular Component	2	J9P716, E2QSF4
6	GO:1905369	endopeptidase complex	Cellular Component	1	E2QW34
6	GO:0015629	actin cytoskeleton	Cellular Component	1	J9NU17
6	GO:0031093	platelet alpha granule lumen	Cellular Component	1	F1PBI6
6	GO:0005882	intermediate filament	Cellular Component	1	F1PTS8
6	GO:0005874	microtubule	Cellular Component	2	J9P716, E2QSF4
6	GO:0045111	intermediate filament cytoskeleton	Cellular Component	1	F1PTS8
7	GO:0045095	keratin filament	Cellular Component	1	F1PTS8

## Sheet: enrich
GO-ID	Term	Category	#Diff	#Ref	%Diff	%Ref	P-Value	FDR	Over/Under	TestSeqs
GO:0015671	oxygen transport	P	5	8	9.25926	1.15774	9.51e-05	0.102	OVER	"P60529, J9JHF7, P60524, F1P8V6, J9JHZ3"
GO:0015669	gas transport	P	5	8	9.25926	1.15774	9.51e-05	0.102	OVER	"P60529, J9JHF7, P60524, F1P8V6, J9JHZ3"
GO:0019825	oxygen binding	F	5	8	9.25926	1.15774	9.51e-05	0.102	OVER	"P60529, J9JHF7, P60524, F1P8V6, J9JHZ3"
GO:0005577	fibrinogen complex	C	4	5	7.40741	0.723589	0.000137	0.11	OVER	"F1P8G0, F1PBI6, F1PBL4, F1PGS2"
GO:0043234	protein complex	C	19	118	35.1852	17.0767	0.000389	0.187	OVER	"P52784, F1PTS8, E2QSF4, P60529, J9NTJ3, J9NU17, J9JHF7, P60524, F1P8G0, F1PBI6, J9P716, F1PBL4, E2RI13, F1PGS2, J9JHZ3, E2QW34, E2RI99, C0LQL0, Q0QEN2"
GO:0060090	"binding, bridging"	F	3	3	5.55556	0.434153	0.000406	0.187	OVER	"F1P8G0, F1PBL4, F1PGS2"
GO:0030674	"protein binding, bridging"	F	3	3	5.55556	0.434153	0.000406	0.187	OVER	"F1P8G0, F1PBL4, F1PGS2"
GO:0020037	heme binding	F	5	11	9.25926	1.5919	0.000658	0.265	OVER	"P60529, J9JHF7, P60524, F1P8V6, J9JHZ3"
GO:0046906	tetrapyrrole binding	F	5	12	9.25926	1.73661	0.00106	0.381	OVER	"P60529, J9JHF7, P60524, F1P8V6, J9JHZ3"
GO:0010035	response to inorganic substance	P	3	4	5.55556	0.578871	0.00154	0.438	OVER	"F1PCG4, F1PBI6, F1PGS2"
GO:0005833	hemoglobin complex	C	4	8	7.40741	1.15774	0.00161	0.438	OVER	"P60529, J9JHF7, P60524, J9JHZ3"
GO:0044445	cytosolic part	C	5	13	9.25926	1.88133	0.00163	0.438	OVER	"P52784, P60529, J9JHF7, P60524, J9JHZ3"
GO:0032991	macromolecular complex	C	19	137	35.1852	19.8263	0.0033	0.658	OVER	"P52784, F1PTS8, E2QSF4, P60529, J9NTJ3, J9NU17, J9JHF7, P60524, F1P8G0, F1PBI6, J9P716, F1PBL4, E2RI13, F1PGS2, J9JHZ3, E2QW34, E2RI99, C0LQL0, Q0QEN2"
GO:0072577	endothelial cell apoptotic process	P	2	2	3.7037	0.289436	0.00559	0.658	OVER	"F1PBI6, F1PGS2"
GO:0008625	extrinsic apoptotic signaling pathway via death domain receptors	P	2	2	3.7037	0.289436	0.00559	0.658	OVER	"F1PBI6, F1PGS2"
GO:1902041	regulation of extrinsic apoptotic signaling pathway via death domain receptors	P	2	2	3.7037	0.289436	0.00559	0.658	OVER	"F1PBI6, F1PGS2"
GO:0051592	response to calcium ion	P	2	2	3.7037	0.289436	0.00559	0.658	OVER	"F1PBI6, F1PGS2"
GO:2000351	regulation of endothelial cell apoptotic process	P	2	2	3.7037	0.289436	0.00559	0.658	OVER	"F1PBI6, F1PGS2"
GO:0097191	extrinsic apoptotic signaling pathway	P	2	2	3.7037	0.289436	0.00559	0.658	OVER	"F1PBI6, F1PGS2"
GO:0016328	lateral plasma membrane	C	2	2	3.7037	0.289436	0.00559	0.658	OVER	"J9NTJ3, J9NU17"
GO:2001237	negative regulation of extrinsic apoptotic signaling pathway	P	2	2	3.7037	0.289436	0.00559	0.658	OVER	"F1PBI6, F1PGS2"
GO:2001236	regulation of extrinsic apoptotic signaling pathway	P	2	2	3.7037	0.289436	0.00559	0.658	OVER	"F1PBI6, F1PGS2"
GO:2001234	negative regulation of apoptotic signaling pathway	P	2	2	3.7037	0.289436	0.00559	0.658	OVER	"F1PBI6, F1PGS2"
GO:0031091	platelet alpha granule	C	2	2	3.7037	0.289436	0.00559	0.658	OVER	"F1PBI6, F1PGS2"
GO:0001775	cell activation	P	4	11	7.40741	1.5919	0.0064	0.658	OVER	"F1P8G0, F1PBI6, F1PBL4, F1PGS2"
GO:0043410	positive regulation of MAPK cascade	P	3	6	5.55556	0.868307	0.00689	0.658	OVER	"F1PBI6, J9NVE9, F1PGS2"
GO:0043408	regulation of MAPK cascade	P	3	6	5.55556	0.868307	0.00689	0.658	OVER	"F1PBI6, J9NVE9, F1PGS2"
GO:0030168	platelet activation	P	3	6	5.55556	0.868307	0.00689	0.658	OVER	"F1P8G0, F1PBL4, F1PGS2"
GO:0005506	iron ion binding	F	4	12	7.40741	1.73661	0.00907	0.658	OVER	"P60529, J9JHF7, P60524, J9JHZ3"
GO:0051258	protein polymerization	P	3	7	5.55556	1.01302	0.0114	0.658	OVER	"F1P8G0, F1PBL4, F1PGS2"
GO:0043623	cellular protein complex assembly	P	3	7	5.55556	1.01302	0.0114	0.658	OVER	"F1P8G0, F1PBL4, F1PGS2"
GO:0034622	cellular macromolecular complex assembly	P	3	7	5.55556	1.01302	0.0114	0.658	OVER	"F1P8G0, F1PBL4, F1PGS2"
GO:1901363	heterocyclic compound binding	F	14	98	25.9259	14.1823	0.0115	0.658	OVER	"P52784, E2QSF4, P60529, J9NU17, J9JHF7, P60524, E2RIG8, E2R5H4, F1P8V6, J9P716, J9JHZ3, E2RI99, F1PGC3, Q0QEN2"
GO:0097159	organic cyclic compound binding	F	14	99	25.9259	14.3271	0.0122	0.658	OVER	"P52784, E2QSF4, P60529, J9NU17, J9JHF7, P60524, E2RIG8, E2R5H4, F1P8V6, J9P716, J9JHZ3, E2RI99, F1PGC3, Q0QEN2"
GO:0031406	carboxylic acid binding	F	2	3	3.7037	0.434153	0.016	0.658	OVER	"F1PBI6, C0LQL0"
GO:0010038	response to metal ion	P	2	3	3.7037	0.434153	0.016	0.658	OVER	"F1PBI6, F1PGS2"
GO:0097285	cell-type specific apoptotic process	P	2	3	3.7037	0.434153	0.016	0.658	OVER	"F1PBI6, F1PGS2"
GO:1904035	regulation of epithelial cell apoptotic process	P	2	3	3.7037	0.434153	0.016	0.658	OVER	"F1PBI6, F1PGS2"
GO:1904019	epithelial cell apoptotic process	P	2	3	3.7037	0.434153	0.016	0.658	OVER	"F1PBI6, F1PGS2"
GO:0043177	organic acid binding	F	2	3	3.7037	0.434153	0.016	0.658	OVER	"F1PBI6, C0LQL0"
GO:0009897	external side of plasma membrane	C	2	3	3.7037	0.434153	0.016	0.658	OVER	"F1PBI6, F1PGS2"
GO:0032561	guanyl ribonucleotide binding	F	3	8	5.55556	1.15774	0.0173	0.658	OVER	"E2QSF4, E2RIG8, J9P716"
GO:1902533	positive regulation of intracellular signal transduction	P	3	8	5.55556	1.15774	0.0173	0.658	OVER	"F1PBI6, J9NVE9, F1PGS2"
GO:0001934	positive regulation of protein phosphorylation	P	3	8	5.55556	1.15774	0.0173	0.658	OVER	"F1PBI6, J9NVE9, F1PGS2"
GO:0023014	signal transduction by protein phosphorylation	P	3	8	5.55556	1.15774	0.0173	0.658	OVER	"F1PBI6, J9NVE9, F1PGS2"
GO:0000165	MAPK cascade	P	3	8	5.55556	1.15774	0.0173	0.658	OVER	"F1PBI6, J9NVE9, F1PGS2"
GO:0005525	GTP binding	F	3	8	5.55556	1.15774	0.0173	0.658	OVER	"E2QSF4, E2RIG8, J9P716"
GO:0019001	guanyl nucleotide binding	F	3	8	5.55556	1.15774	0.0173	0.658	OVER	"E2QSF4, E2RIG8, J9P716"
GO:0009611	response to wounding	P	6	30	11.1111	4.34153	0.0199	0.658	OVER	"F1P8G0, F1PBI6, F1PBL4, F1PGS2, F5XVB0, C0LQL0"
GO:0032555	purine ribonucleotide binding	F	7	39	12.963	5.64399	0.0214	0.658	OVER	"P52784, E2QSF4, J9NU17, E2RIG8, E2R5H4, J9P716, Q0QEN2"
GO:0032550	purine ribonucleoside binding	F	7	39	12.963	5.64399	0.0214	0.658	OVER	"P52784, E2QSF4, J9NU17, E2RIG8, E2R5H4, J9P716, Q0QEN2"
GO:0032549	ribonucleoside binding	F	7	39	12.963	5.64399	0.0214	0.658	OVER	"P52784, E2QSF4, J9NU17, E2RIG8, E2R5H4, J9P716, Q0QEN2"
GO:0017076	purine nucleotide binding	F	7	39	12.963	5.64399	0.0214	0.658	OVER	"P52784, E2QSF4, J9NU17, E2RIG8, E2R5H4, J9P716, Q0QEN2"
GO:0035639	purine ribonucleoside triphosphate binding	F	7	39	12.963	5.64399	0.0214	0.658	OVER	"P52784, E2QSF4, J9NU17, E2RIG8, E2R5H4, J9P716, Q0QEN2"
GO:0001883	purine nucleoside binding	F	7	39	12.963	5.64399	0.0214	0.658	OVER	"P52784, E2QSF4, J9NU17, E2RIG8, E2R5H4, J9P716, Q0QEN2"
GO:0001882	nucleoside binding	F	7	39	12.963	5.64399	0.0214	0.658	OVER	"P52784, E2QSF4, J9NU17, E2RIG8, E2R5H4, J9P716, Q0QEN2"
GO:0046914	transition metal ion binding	F	8	48	14.8148	6.94645	0.0215	0.658	OVER	"P60529, J9JHF7, P60524, J9NYN2, E2RH23, J9JHZ3, F1PBK6, C0LQL0"
GO:0007596	blood coagulation	P	5	23	9.25926	3.32851	0.0238	0.658	OVER	"F1P8G0, F1PBI6, F1PBL4, F1PGS2, F5XVB0"
GO:0050817	coagulation	P	5	23	9.25926	3.32851	0.0238	0.658	OVER	"F1P8G0, F1PBI6, F1PBL4, F1PGS2, F5XVB0"
GO:0032553	ribonucleotide binding	F	7	40	12.963	5.78871	0.0245	0.658	OVER	"P52784, E2QSF4, J9NU17, E2RIG8, E2R5H4, J9P716, Q0QEN2"
GO:0042327	positive regulation of phosphorylation	P	3	9	5.55556	1.30246	0.0246	0.658	OVER	"F1PBI6, J9NVE9, F1PGS2"
GO:0036094	small molecule binding	F	9	55	16.6667	7.95948	0.0276	0.658	OVER	"P52784, E2QSF4, J9NU17, E2RIG8, E2R5H4, F1PBI6, J9P716, C0LQL0, Q0QEN2"
GO:0007599	hemostasis	P	5	24	9.25926	3.47323	0.0284	0.658	OVER	"F1P8G0, F1PBI6, F1PBL4, F1PGS2, F5XVB0"
GO:0043168	anion binding	F	9	57	16.6667	8.24891	0.03	0.658	OVER	"P52784, E2QSF4, J9NU17, E2RIG8, E2R5H4, F1PBI6, J9P716, C0LQL0, Q0QEN2"
GO:0070374	positive regulation of ERK1 and ERK2 cascade	P	2	4	3.7037	0.578871	0.0304	0.658	OVER	"J9NVE9, F1PGS2"
GO:0070372	regulation of ERK1 and ERK2 cascade	P	2	4	3.7037	0.578871	0.0304	0.658	OVER	"J9NVE9, F1PGS2"
GO:0031639	plasminogen activation	P	2	4	3.7037	0.578871	0.0304	0.658	OVER	"F1PBI6, F1PGS2"
GO:0031638	zymogen activation	P	2	4	3.7037	0.578871	0.0304	0.658	OVER	"F1PBI6, F1PGS2"
GO:0098590	plasma membrane region	C	2	4	3.7037	0.578871	0.0304	0.658	OVER	"J9NTJ3, J9NU17"
GO:0098552	side of membrane	C	2	4	3.7037	0.578871	0.0304	0.658	OVER	"F1PBI6, F1PGS2"
GO:0005200	structural constituent of cytoskeleton	F	2	4	3.7037	0.578871	0.0304	0.658	OVER	"E2QSF4, J9P716"
GO:0006887	exocytosis	P	2	4	3.7037	0.578871	0.0304	0.658	OVER	"F1PBI6, F1PGS2"
GO:0018193	peptidyl-amino acid modification	P	2	4	3.7037	0.578871	0.0304	0.658	OVER	"J9NVE9, Q9MZD3"
GO:0030141	secretory granule	C	2	4	3.7037	0.578871	0.0304	0.658	OVER	"F1PBI6, F1PGS2"
GO:0097190	apoptotic signaling pathway	P	2	4	3.7037	0.578871	0.0304	0.658	OVER	"F1PBI6, F1PGS2"
GO:0050839	cell adhesion molecule binding	F	2	4	3.7037	0.578871	0.0304	0.658	OVER	"F1PBI6, F1PGS2"
GO:2001233	regulation of apoptotic signaling pathway	P	2	4	3.7037	0.578871	0.0304	0.658	OVER	"F1PBI6, F1PGS2"
GO:0005576	extracellular region	C	10	230	18.5185	33.2851	0.0304	0.658	UNDER	"F1P8G0, F1PBI6, J9NVE9, F1PBL4, F1PGS2, F5XVB0, F1Q432, E2RQF8, E2RRU2, F1PBK6"
GO:0001932	regulation of protein phosphorylation	P	3	10	5.55556	1.44718	0.0333	0.658	OVER	"F1PBI6, J9NVE9, F1PGS2"
GO:0010562	positive regulation of phosphorus metabolic process	P	3	10	5.55556	1.44718	0.0333	0.658	OVER	"F1PBI6, J9NVE9, F1PGS2"
GO:0045937	positive regulation of phosphate metabolic process	P	3	10	5.55556	1.44718	0.0333	0.658	OVER	"F1PBI6, J9NVE9, F1PGS2"
GO:0007017	microtubule-based process	P	3	10	5.55556	1.44718	0.0333	0.658	OVER	"E2QSF4, J9NTJ3, J9P716"
GO:0005102	receptor binding	F	5	25	9.25926	3.61795	0.0335	0.658	OVER	"F1P8G0, F1PBI6, F1PBL4, F1PGS2, C0LQL0"
GO:0042060	wound healing	P	5	25	9.25926	3.61795	0.0335	0.658	OVER	"F1P8G0, F1PBI6, F1PBL4, F1PGS2, F5XVB0"
GO:0005622	intracellular	C	26	250	48.1481	36.1795	0.0351	0.658	OVER	"J9PB81, P52784, F1PTS8, E2QSF4, F1PPB6, P60529, J9P6T6, J9NTJ3, J9NU17, J9JHF7, P60524, F1PN38, E2RIG8, E2RH23, F1PBI6, J9P716, J9NWQ5, E2RI13, Q9MZD3, F1PGS2, J9JHZ3, F1PBK6, E2QW34, E2RI99, C0LQL0, Q0QEN2"
GO:0010604	positive regulation of macromolecule metabolic process	P	5	26	9.25926	3.76266	0.0391	0.658	OVER	"F1PBI6, J9NVE9, E2RI13, F1PGS2, E2RI99"
GO:0000166	nucleotide binding	F	7	44	12.963	6.36758	0.0396	0.658	OVER	"P52784, E2QSF4, J9NU17, E2RIG8, E2R5H4, J9P716, Q0QEN2"
GO:1901265	nucleoside phosphate binding	F	7	44	12.963	6.36758	0.0396	0.658	OVER	"P52784, E2QSF4, J9NU17, E2RIG8, E2R5H4, J9P716, Q0QEN2"
GO:0071822	protein complex subunit organization	P	4	18	7.40741	2.60492	0.0399	0.658	OVER	"F1P8G0, F1PBL4, F1PGS2, F1Q432"
GO:0051707	response to other organism	P	3	11	5.55556	1.5919	0.0434	0.658	OVER	"J9PB81, F1PGS2, F1PGC3"
GO:0009607	response to biotic stimulus	P	3	11	5.55556	1.5919	0.0434	0.658	OVER	"J9PB81, F1PGS2, F1PGC3"
GO:0042325	regulation of phosphorylation	P	3	11	5.55556	1.5919	0.0434	0.658	OVER	"F1PBI6, J9NVE9, F1PGS2"
GO:0010647	positive regulation of cell communication	P	3	11	5.55556	1.5919	0.0434	0.658	OVER	"F1PBI6, J9NVE9, F1PGS2"
GO:0023056	positive regulation of signaling	P	3	11	5.55556	1.5919	0.0434	0.658	OVER	"F1PBI6, J9NVE9, F1PGS2"
GO:0043207	response to external biotic stimulus	P	3	11	5.55556	1.5919	0.0434	0.658	OVER	"J9PB81, F1PGS2, F1PGC3"
GO:0009967	positive regulation of signal transduction	P	3	11	5.55556	1.5919	0.0434	0.658	OVER	"F1PBI6, J9NVE9, F1PGS2"
GO:0005829	cytosol	C	5	27	9.25926	3.90738	0.0453	0.658	OVER	"P52784, P60529, J9JHF7, P60524, J9JHZ3"
GO:0050878	regulation of body fluid levels	P	5	27	9.25926	3.90738	0.0453	0.658	OVER	"F1P8G0, F1PBI6, F1PBL4, F1PGS2, F5XVB0"
GO:0097367	carbohydrate derivative binding	F	8	51	14.8148	7.38061	0.0459	0.658	OVER	"P52784, E2QSF4, J9NU17, E2RIG8, E2R5H4, F1PBI6, J9P716, Q0QEN2"
GO:0044430	cytoskeletal part	C	6	36	11.1111	5.20984	0.0459	0.658	OVER	"F1PTS8, E2QSF4, J9NTJ3, J9NU17, J9P716, C0LQL0"
GO:0032403	protein complex binding	F	4	19	7.40741	2.74964	0.0478	0.658	OVER	"J9NTJ3, F1PBI6, F5XVB0, C0LQL0"
GO:0044424	intracellular part	C	25	242	46.2963	35.0217	0.0481	0.658	OVER	"J9PB81, P52784, F1PTS8, E2QSF4, F1PPB6, P60529, J9P6T6, J9NTJ3, J9NU17, J9JHF7, P60524, F1PN38, E2RH23, F1PBI6, J9P716, J9NWQ5, E2RI13, Q9MZD3, F1PGS2, J9JHZ3, F1PBK6, E2QW34, E2RI99, C0LQL0, Q0QEN2"
GO:0070371	ERK1 and ERK2 cascade	P	2	5	3.7037	0.723589	0.0482	0.658	OVER	"J9NVE9, F1PGS2"
GO:0046903	secretion	P	2	5	3.7037	0.723589	0.0482	0.658	OVER	"F1PBI6, F1PGS2"
GO:0008017	microtubule binding	F	2	5	3.7037	0.723589	0.0482	0.658	OVER	"J9NTJ3, C0LQL0"
GO:0098589	membrane region	C	2	5	3.7037	0.723589	0.0482	0.658	OVER	"J9NTJ3, J9NU17"
GO:0051604	protein maturation	P	2	5	3.7037	0.723589	0.0482	0.658	OVER	"F1PBI6, F1PGS2"
GO:0010648	negative regulation of cell communication	P	2	5	3.7037	0.723589	0.0482	0.658	OVER	"F1PBI6, F1PGS2"
GO:0023057	negative regulation of signaling	P	2	5	3.7037	0.723589	0.0482	0.658	OVER	"F1PBI6, F1PGS2"
GO:0042730	fibrinolysis	P	2	5	3.7037	0.723589	0.0482	0.658	OVER	"F1PBI6, F1PGS2"
GO:0032940	secretion by cell	P	2	5	3.7037	0.723589	0.0482	0.658	OVER	"F1PBI6, F1PGS2"
GO:0016485	protein processing	P	2	5	3.7037	0.723589	0.0482	0.658	OVER	"F1PBI6, F1PGS2"
GO:0009968	negative regulation of signal transduction	P	2	5	3.7037	0.723589	0.0482	0.658	OVER	"F1PBI6, F1PGS2"
GO:0003924	GTPase activity	F	2	5	3.7037	0.723589	0.0482	0.658	OVER	"E2QSF4, J9P716"
GO:0043069	negative regulation of programmed cell death	P	2	5	3.7037	0.723589	0.0482	0.658	OVER	"F1PBI6, F1PGS2"
GO:0043066	negative regulation of apoptotic process	P	2	5	3.7037	0.723589	0.0482	0.658	OVER	"F1PBI6, F1PGS2"
GO:0031325	positive regulation of cellular metabolic process	P	5	28	9.25926	4.0521	0.052	0.658	OVER	"F1PBI6, J9NVE9, E2RI13, F1PGS2, E2RI99"
GO:0006954	inflammatory response	P	3	12	5.55556	1.73661	0.0548	0.658	OVER	"F1PBI6, J9NVE9, C0LQL0"
GO:0031401	positive regulation of protein modification process	P	3	12	5.55556	1.73661	0.0548	0.658	OVER	"F1PBI6, J9NVE9, F1PGS2"
GO:1902531	regulation of intracellular signal transduction	P	3	12	5.55556	1.73661	0.0548	0.658	OVER	"F1PBI6, J9NVE9, F1PGS2"
GO:0042127	regulation of cell proliferation	P	3	12	5.55556	1.73661	0.0548	0.658	OVER	"F1PF31, F1PBI6, E2RI99"
GO:0006468	protein phosphorylation	P	4	20	7.40741	2.89436	0.0565	0.658	OVER	"E2R5H4, F1PBI6, J9NVE9, F1PGS2"
GO:0051704	multi-organism process	P	4	20	7.40741	2.89436	0.0565	0.658	OVER	"J9PB81, Q9MZD3, F1PGS2, F1PGC3"
GO:0044877	macromolecular complex binding	F	4	20	7.40741	2.89436	0.0565	0.658	OVER	"J9NTJ3, F1PBI6, F5XVB0, C0LQL0"
GO:0044464	cell part	C	30	308	55.5556	44.5731	0.057	0.658	OVER	"J9PB81, F1PDY8, P52784, F1PTS8, E2QSF4, F1PPB6, P60529, J9P6T6, J9NTJ3, J9NU17, J9JHF7, P60524, F1PN38, F1PE38, E2RIG8, E2RH23, F1P8G0, F1PBI6, J9P716, F1PBL4, J9NWQ5, E2RI13, Q9MZD3, F1PGS2, J9JHZ3, F1PBK6, E2QW34, E2RI99, C0LQL0, Q0QEN2"
GO:0005623	cell	C	30	310	55.5556	44.8625	0.0582	0.658	OVER	"J9PB81, F1PDY8, P52784, F1PTS8, E2QSF4, F1PPB6, P60529, J9P6T6, J9NTJ3, J9NU17, J9JHF7, P60524, F1PN38, F1PE38, E2RIG8, E2RH23, F1P8G0, F1PBI6, J9P716, F1PBL4, J9NWQ5, E2RI13, Q9MZD3, F1PGS2, J9JHZ3, F1PBK6, E2QW34, E2RI99, C0LQL0, Q0QEN2"
GO:0043167	ion binding	F	18	162	33.3333	23.4443	0.0598	0.658	OVER	"P52784, E2QSF4, P60529, J9NU17, J9JHF7, P60524, F1PE38, J9NYN2, E2RIG8, E2RH23, E2R5H4, F1PBI6, J9P716, J9NWQ5, J9JHZ3, F1PBK6, C0LQL0, Q0QEN2"
GO:0098772	molecular function regulator	F	0	41	0	5.93343	0.064	0.658	UNDER
GO:0022610	biological adhesion	P	5	30	9.25926	4.34153	0.0672	0.658	OVER	"F1PF31, F1PE38, F1PBI6, F1PGS2, F5XVB0"
GO:0007155	cell adhesion	P	5	30	9.25926	4.34153	0.0672	0.658	OVER	"F1PF31, F1PE38, F1PBI6, F1PGS2, F5XVB0"
GO:1901700	response to oxygen-containing compound	P	3	13	5.55556	1.88133	0.0675	0.658	OVER	"F1PCG4, F1PBI6, E2RI99"
GO:0019220	regulation of phosphate metabolic process	P	3	13	5.55556	1.88133	0.0675	0.658	OVER	"F1PBI6, J9NVE9, F1PGS2"
GO:0061045	negative regulation of wound healing	P	2	6	3.7037	0.868307	0.0688	0.658	OVER	"F1PBI6, F1PGS2"
GO:1900047	negative regulation of hemostasis	P	2	6	3.7037	0.868307	0.0688	0.658	OVER	"F1PBI6, F1PGS2"
GO:0060548	negative regulation of cell death	P	2	6	3.7037	0.868307	0.0688	0.658	OVER	"F1PBI6, F1PGS2"
GO:0015631	tubulin binding	F	2	6	3.7037	0.868307	0.0688	0.658	OVER	"J9NTJ3, C0LQL0"
GO:0030195	negative regulation of blood coagulation	P	2	6	3.7037	0.868307	0.0688	0.658	OVER	"F1PBI6, F1PGS2"
GO:0007160	cell-matrix adhesion	P	2	6	3.7037	0.868307	0.0688	0.658	OVER	"F1PBI6, F1PGS2"
GO:0045298	tubulin complex	C	2	6	3.7037	0.868307	0.0688	0.658	OVER	"J9NTJ3, C0LQL0"
GO:2000117	negative regulation of cysteine-type endopeptidase activity	P	1	1	1.85185	0.144718	0.0754	0.658	OVER	F1PBI6
GO:0034333	adherens junction assembly	P	1	1	1.85185	0.144718	0.0754	0.658	OVER	F1PBI6
GO:0034332	adherens junction organization	P	1	1	1.85185	0.144718	0.0754	0.658	OVER	F1PBI6
GO:0007610	behavior	P	1	1	1.85185	0.144718	0.0754	0.658	OVER	F1PBI6
GO:1903392	negative regulation of adherens junction organization	P	1	1	1.85185	0.144718	0.0754	0.658	OVER	F1PBI6
GO:1903391	regulation of adherens junction organization	P	1	1	1.85185	0.144718	0.0754	0.658	OVER	F1PBI6
GO:0046942	carboxylic acid transport	P	1	1	1.85185	0.144718	0.0754	0.658	OVER	F1PBI6
GO:0043652	engulfment of apoptotic cell	P	1	1	1.85185	0.144718	0.0754	0.658	OVER	F1PBI6
GO:0071451	cellular response to superoxide	P	1	1	1.85185	0.144718	0.0754	0.658	OVER	F1PCG4
GO:0071450	cellular response to oxygen radical	P	1	1	1.85185	0.144718	0.0754	0.658	OVER	F1PCG4
GO:0015849	organic acid transport	P	1	1	1.85185	0.144718	0.0754	0.658	OVER	F1PBI6
GO:0015833	peptide transport	P	1	1	1.85185	0.144718	0.0754	0.658	OVER	F1PGS2
GO:0042535	positive regulation of tumor necrosis factor biosynthetic process	P	1	1	1.85185	0.144718	0.0754	0.658	OVER	F1PBI6
GO:0042534	regulation of tumor necrosis factor biosynthetic process	P	1	1	1.85185	0.144718	0.0754	0.658	OVER	F1PBI6
GO:0042533	tumor necrosis factor biosynthetic process	P	1	1	1.85185	0.144718	0.0754	0.658	OVER	F1PBI6
GO:0009187	cyclic nucleotide metabolic process	P	1	1	1.85185	0.144718	0.0754	0.658	OVER	F1PBI6
GO:0002793	positive regulation of peptide secretion	P	1	1	1.85185	0.144718	0.0754	0.658	OVER	F1PGS2
GO:0002791	regulation of peptide secretion	P	1	1	1.85185	0.144718	0.0754	0.658	OVER	F1PGS2
GO:0002790	peptide secretion	P	1	1	1.85185	0.144718	0.0754	0.658	OVER	F1PGS2
GO:0032760	positive regulation of tumor necrosis factor production	P	1	1	1.85185	0.144718	0.0754	0.658	OVER	F1PBI6
GO:0009166	nucleotide catabolic process	P	1	1	1.85185	0.144718	0.0754	0.658	OVER	F1PPB6
GO:0051895	negative regulation of focal adhesion assembly	P	1	1	1.85185	0.144718	0.0754	0.658	OVER	F1PBI6
GO:0051893	regulation of focal adhesion assembly	P	1	1	1.85185	0.144718	0.0754	0.658	OVER	F1PBI6
GO:0050795	regulation of behavior	P	1	1	1.85185	0.144718	0.0754	0.658	OVER	F1PBI6
GO:0010324	membrane invagination	P	1	1	1.85185	0.144718	0.0754	0.658	OVER	F1PBI6
GO:0045197	establishment or maintenance of epithelial cell apical/basal polarity	P	1	1	1.85185	0.144718	0.0754	0.658	OVER	J9NTJ3
GO:0030511	positive regulation of transforming growth factor beta receptor signaling pathway	P	1	1	1.85185	0.144718	0.0754	0.658	OVER	F1PBI6
GO:1903960	negative regulation of anion transmembrane transport	P	1	1	1.85185	0.144718	0.0754	0.658	OVER	F1PBI6
GO:0098656	anion transmembrane transport	P	1	1	1.85185	0.144718	0.0754	0.658	OVER	F1PBI6
GO:1903959	regulation of anion transmembrane transport	P	1	1	1.85185	0.144718	0.0754	0.658	OVER	F1PBI6
GO:0050714	positive regulation of protein secretion	P	1	1	1.85185	0.144718	0.0754	0.658	OVER	F1PGS2
GO:0044070	regulation of anion transport	P	1	1	1.85185	0.144718	0.0754	0.658	OVER	F1PBI6
GO:0044057	regulation of system process	P	1	1	1.85185	0.144718	0.0754	0.658	OVER	F1PGS2
GO:0006493	protein O-linked glycosylation	P	1	1	1.85185	0.144718	0.0754	0.658	OVER	F1PBI6
GO:0034284	response to monosaccharide	P	1	1	1.85185	0.144718	0.0754	0.658	OVER	F1PBI6
GO:0009749	response to glucose	P	1	1	1.85185	0.144718	0.0754	0.658	OVER	F1PBI6
GO:0009746	response to hexose	P	1	1	1.85185	0.144718	0.0754	0.658	OVER	F1PBI6
GO:0009743	response to carbohydrate	P	1	1	1.85185	0.144718	0.0754	0.658	OVER	F1PBI6
GO:0034250	positive regulation of cellular amide metabolic process	P	1	1	1.85185	0.144718	0.0754	0.658	OVER	F1PBI6
GO:0046887	positive regulation of hormone secretion	P	1	1	1.85185	0.144718	0.0754	0.658	OVER	F1PGS2
GO:0046883	regulation of hormone secretion	P	1	1	1.85185	0.144718	0.0754	0.658	OVER	F1PGS2
GO:0046879	hormone secretion	P	1	1	1.85185	0.144718	0.0754	0.658	OVER	F1PGS2
GO:0033138	positive regulation of peptidyl-serine phosphorylation	P	1	1	1.85185	0.144718	0.0754	0.658	OVER	J9NVE9
GO:0033135	regulation of peptidyl-serine phosphorylation	P	1	1	1.85185	0.144718	0.0754	0.658	OVER	J9NVE9
GO:0032026	response to magnesium ion	P	1	1	1.85185	0.144718	0.0754	0.658	OVER	F1PBI6
GO:0002040	sprouting angiogenesis	P	1	1	1.85185	0.144718	0.0754	0.658	OVER	F1PBI6
GO:0016859	cis-trans isomerase activity	F	1	1	1.85185	0.144718	0.0754	0.658	OVER	Q9MZD3
GO:0045727	positive regulation of translation	P	1	1	1.85185	0.144718	0.0754	0.658	OVER	F1PBI6
GO:0043537	negative regulation of blood vessel endothelial cell migration	P	1	1	1.85185	0.144718	0.0754	0.658	OVER	F1PBI6
GO:0043536	positive regulation of blood vessel endothelial cell migration	P	1	1	1.85185	0.144718	0.0754	0.658	OVER	F1PBI6
GO:0032695	negative regulation of interleukin-12 production	P	1	1	1.85185	0.144718	0.0754	0.658	OVER	F1PBI6
GO:0043535	regulation of blood vessel endothelial cell migration	P	1	1	1.85185	0.144718	0.0754	0.658	OVER	F1PBI6
GO:0032680	regulation of tumor necrosis factor production	P	1	1	1.85185	0.144718	0.0754	0.658	OVER	F1PBI6
GO:0015718	monocarboxylic acid transport	P	1	1	1.85185	0.144718	0.0754	0.658	OVER	F1PBI6
GO:0032655	regulation of interleukin-12 production	P	1	1	1.85185	0.144718	0.0754	0.658	OVER	F1PBI6
GO:0003755	peptidyl-prolyl cis-trans isomerase activity	F	1	1	1.85185	0.144718	0.0754	0.658	OVER	Q9MZD3
GO:0032640	tumor necrosis factor production	P	1	1	1.85185	0.144718	0.0754	0.658	OVER	F1PBI6
GO:0001578	microtubule bundle formation	P	1	1	1.85185	0.144718	0.0754	0.658	OVER	J9NTJ3
GO:0050680	negative regulation of epithelial cell proliferation	P	1	1	1.85185	0.144718	0.0754	0.658	OVER	F1PBI6
GO:0050678	regulation of epithelial cell proliferation	P	1	1	1.85185	0.144718	0.0754	0.658	OVER	F1PBI6
GO:0050673	epithelial cell proliferation	P	1	1	1.85185	0.144718	0.0754	0.658	OVER	F1PBI6
GO:0005903	brush border	C	1	1	1.85185	0.144718	0.0754	0.658	OVER	J9NU17
GO:0005902	microvillus	C	1	1	1.85185	0.144718	0.0754	0.658	OVER	J9NU17
GO:0032615	interleukin-12 production	P	1	1	1.85185	0.144718	0.0754	0.658	OVER	F1PBI6
GO:0002605	negative regulation of dendritic cell antigen processing and presentation	P	1	1	1.85185	0.144718	0.0754	0.658	OVER	F1PBI6
GO:0002604	regulation of dendritic cell antigen processing and presentation	P	1	1	1.85185	0.144718	0.0754	0.658	OVER	F1PBI6
GO:1903846	positive regulation of cellular response to transforming growth factor beta stimulus	P	1	1	1.85185	0.144718	0.0754	0.658	OVER	F1PBI6
GO:1903844	regulation of cellular response to transforming growth factor beta stimulus	P	1	1	1.85185	0.144718	0.0754	0.658	OVER	F1PBI6
GO:0000413	protein peptidyl-prolyl isomerization	P	1	1	1.85185	0.144718	0.0754	0.658	OVER	Q9MZD3
GO:0045069	regulation of viral genome replication	P	1	1	1.85185	0.144718	0.0754	0.658	OVER	Q9MZD3
GO:1901654	response to ketone	P	1	1	1.85185	0.144718	0.0754	0.658	OVER	F1PBI6
GO:0019430	removal of superoxide radicals	P	1	1	1.85185	0.144718	0.0754	0.658	OVER	F1PCG4
GO:1903825	organic acid transmembrane transport	P	1	1	1.85185	0.144718	0.0754	0.658	OVER	F1PBI6
GO:0097427	microtubule bundle	C	1	1	1.85185	0.144718	0.0754	0.658	OVER	J9NTJ3
GO:1900542	regulation of purine nucleotide metabolic process	P	1	1	1.85185	0.144718	0.0754	0.658	OVER	F1PBI6
GO:0009636	response to toxic substance	P	1	1	1.85185	0.144718	0.0754	0.658	OVER	F1PCG4
GO:2001027	negative regulation of endothelial cell chemotaxis	P	1	1	1.85185	0.144718	0.0754	0.658	OVER	F1PBI6
GO:2001026	regulation of endothelial cell chemotaxis	P	1	1	1.85185	0.144718	0.0754	0.658	OVER	F1PBI6
GO:0034116	positive regulation of heterotypic cell-cell adhesion	P	1	1	1.85185	0.144718	0.0754	0.658	OVER	F1PGS2
GO:0034114	regulation of heterotypic cell-cell adhesion	P	1	1	1.85185	0.144718	0.0754	0.658	OVER	F1PGS2
GO:0034113	heterotypic cell-cell adhesion	P	1	1	1.85185	0.144718	0.0754	0.658	OVER	F1PGS2
GO:0004139	deoxyribose-phosphate aldolase activity	F	1	1	1.85185	0.144718	0.0754	0.658	OVER	F1PPB6
GO:0051047	positive regulation of secretion	P	1	1	1.85185	0.144718	0.0754	0.658	OVER	F1PGS2
GO:0003018	vascular process in circulatory system	P	1	1	1.85185	0.144718	0.0754	0.658	OVER	F1PGS2
GO:0072341	modified amino acid binding	F	1	1	1.85185	0.144718	0.0754	0.658	OVER	F1PBI6
GO:0034774	secretory granule lumen	C	1	1	1.85185	0.144718	0.0754	0.658	OVER	F1PBI6
GO:0016715	"oxidoreductase activity, acting on paired donors, with incorporation or reduction of molecular oxygen, reduced ascorbate as one donor, and incorporation of one atom of oxygen"	F	1	1	1.85185	0.144718	0.0754	0.658	OVER	F6X870
GO:1902043	positive regulation of extrinsic apoptotic signaling pathway via death domain receptors	P	1	1	1.85185	0.144718	0.0754	0.658	OVER	F1PBI6
GO:1902042	negative regulation of extrinsic apoptotic signaling pathway via death domain receptors	P	1	1	1.85185	0.144718	0.0754	0.658	OVER	F1PGS2
GO:0032570	response to progesterone	P	1	1	1.85185	0.144718	0.0754	0.658	OVER	F1PBI6
GO:0042310	vasoconstriction	P	1	1	1.85185	0.144718	0.0754	0.658	OVER	F1PGS2
GO:0002581	negative regulation of antigen processing and presentation of peptide or polysaccharide antigen via MHC class II	P	1	1	1.85185	0.144718	0.0754	0.658	OVER	F1PBI6
GO:0002580	regulation of antigen processing and presentation of peptide or polysaccharide antigen via MHC class II	P	1	1	1.85185	0.144718	0.0754	0.658	OVER	F1PBI6
GO:0002578	negative regulation of antigen processing and presentation	P	1	1	1.85185	0.144718	0.0754	0.658	OVER	F1PBI6
GO:0002577	regulation of antigen processing and presentation	P	1	1	1.85185	0.144718	0.0754	0.658	OVER	F1PBI6
GO:0002576	platelet degranulation	P	1	1	1.85185	0.144718	0.0754	0.658	OVER	F1PBI6
GO:1902001	fatty acid transmembrane transport	P	1	1	1.85185	0.144718	0.0754	0.658	OVER	F1PBI6
GO:0006911	"phagocytosis, engulfment"	P	1	1	1.85185	0.144718	0.0754	0.658	OVER	F1PBI6
GO:0002544	chronic inflammatory response	P	1	1	1.85185	0.144718	0.0754	0.658	OVER	F1PBI6
GO:1903792	negative regulation of anion transport	P	1	1	1.85185	0.144718	0.0754	0.658	OVER	F1PBI6
GO:0002504	antigen processing and presentation of peptide or polysaccharide antigen via MHC class II	P	1	1	1.85185	0.144718	0.0754	0.658	OVER	F1PBI6
GO:0046068	cGMP metabolic process	P	1	1	1.85185	0.144718	0.0754	0.658	OVER	F1PBI6
GO:0000305	response to oxygen radical	P	1	1	1.85185	0.144718	0.0754	0.658	OVER	F1PCG4
GO:0000303	response to superoxide	P	1	1	1.85185	0.144718	0.0754	0.658	OVER	F1PCG4
GO:0017157	regulation of exocytosis	P	1	1	1.85185	0.144718	0.0754	0.658	OVER	F1PGS2
GO:0071814	protein-lipid complex binding	F	1	1	1.85185	0.144718	0.0754	0.658	OVER	F1PBI6
GO:0071813	lipoprotein particle binding	F	1	1	1.85185	0.144718	0.0754	0.658	OVER	F1PBI6
GO:0010763	positive regulation of fibroblast migration	P	1	1	1.85185	0.144718	0.0754	0.658	OVER	F1PBI6
GO:0010762	regulation of fibroblast migration	P	1	1	1.85185	0.144718	0.0754	0.658	OVER	F1PBI6
GO:0010761	fibroblast migration	P	1	1	1.85185	0.144718	0.0754	0.658	OVER	F1PBI6
GO:0010754	negative regulation of cGMP-mediated signaling	P	1	1	1.85185	0.144718	0.0754	0.658	OVER	F1PBI6
GO:0010752	regulation of cGMP-mediated signaling	P	1	1	1.85185	0.144718	0.0754	0.658	OVER	F1PBI6
GO:0010751	negative regulation of nitric oxide mediated signal transduction	P	1	1	1.85185	0.144718	0.0754	0.658	OVER	F1PBI6
GO:0017134	fibroblast growth factor binding	F	1	1	1.85185	0.144718	0.0754	0.658	OVER	F1PBI6
GO:0010749	regulation of nitric oxide mediated signal transduction	P	1	1	1.85185	0.144718	0.0754	0.658	OVER	F1PBI6
GO:0010748	negative regulation of plasma membrane long-chain fatty acid transport	P	1	1	1.85185	0.144718	0.0754	0.658	OVER	F1PBI6
GO:0010746	regulation of plasma membrane long-chain fatty acid transport	P	1	1	1.85185	0.144718	0.0754	0.658	OVER	F1PBI6
GO:0010739	positive regulation of protein kinase A signaling	P	1	1	1.85185	0.144718	0.0754	0.658	OVER	J9NVE9
GO:0010738	regulation of protein kinase A signaling	P	1	1	1.85185	0.144718	0.0754	0.658	OVER	J9NVE9
GO:0010737	protein kinase A signaling	P	1	1	1.85185	0.144718	0.0754	0.658	OVER	J9NVE9
GO:0018208	peptidyl-proline modification	P	1	1	1.85185	0.144718	0.0754	0.658	OVER	Q9MZD3
GO:0035150	regulation of tube size	P	1	1	1.85185	0.144718	0.0754	0.658	OVER	F1PGS2
GO:0004089	carbonate dehydratase activity	F	1	1	1.85185	0.144718	0.0754	0.658	OVER	F1PBK6
GO:0019955	cytokine binding	F	1	1	1.85185	0.144718	0.0754	0.658	OVER	F1PBI6
GO:0019935	cyclic-nucleotide-mediated signaling	P	1	1	1.85185	0.144718	0.0754	0.658	OVER	F1PBI6
GO:0019934	cGMP-mediated signaling	P	1	1	1.85185	0.144718	0.0754	0.658	OVER	F1PBI6
GO:0019932	second-messenger-mediated signaling	P	1	1	1.85185	0.144718	0.0754	0.658	OVER	F1PBI6
GO:0090288	negative regulation of cellular response to growth factor stimulus	P	1	1	1.85185	0.144718	0.0754	0.658	OVER	F1PBI6
GO:0090287	regulation of cellular response to growth factor stimulus	P	1	1	1.85185	0.144718	0.0754	0.658	OVER	F1PBI6
GO:0035767	endothelial cell chemotaxis	P	1	1	1.85185	0.144718	0.0754	0.658	OVER	F1PBI6
GO:0070052	collagen V binding	F	1	1	1.85185	0.144718	0.0754	0.658	OVER	F1PBI6
GO:0070051	fibrinogen binding	F	1	1	1.85185	0.144718	0.0754	0.658	OVER	F1PBI6
GO:0090277	positive regulation of peptide hormone secretion	P	1	1	1.85185	0.144718	0.0754	0.658	OVER	F1PGS2
GO:0090276	regulation of peptide hormone secretion	P	1	1	1.85185	0.144718	0.0754	0.658	OVER	F1PGS2
GO:0032465	regulation of cytokinesis	P	1	1	1.85185	0.144718	0.0754	0.658	OVER	F1PN38
GO:0040037	negative regulation of fibroblast growth factor receptor signaling pathway	P	1	1	1.85185	0.144718	0.0754	0.658	OVER	F1PBI6
GO:0040036	regulation of fibroblast growth factor receptor signaling pathway	P	1	1	1.85185	0.144718	0.0754	0.658	OVER	F1PBI6
GO:0002468	dendritic cell antigen processing and presentation	P	1	1	1.85185	0.144718	0.0754	0.658	OVER	F1PBI6
GO:0034614	cellular response to reactive oxygen species	P	1	1	1.85185	0.144718	0.0754	0.658	OVER	F1PCG4
GO:0060205	cytoplasmic membrane-bounded vesicle lumen	C	1	1	1.85185	0.144718	0.0754	0.658	OVER	F1PBI6
GO:0050431	transforming growth factor beta binding	F	1	1	1.85185	0.144718	0.0754	0.658	OVER	F1PBI6
GO:0031983	vesicle lumen	C	1	1	1.85185	0.144718	0.0754	0.658	OVER	F1PBI6
GO:0019229	regulation of vasoconstriction	P	1	1	1.85185	0.144718	0.0754	0.658	OVER	F1PGS2
GO:0071706	tumor necrosis factor superfamily cytokine production	P	1	1	1.85185	0.144718	0.0754	0.658	OVER	F1PBI6
GO:0035088	establishment or maintenance of apical/basal cell polarity	P	1	1	1.85185	0.144718	0.0754	0.658	OVER	J9NTJ3
GO:0010634	positive regulation of epithelial cell migration	P	1	1	1.85185	0.144718	0.0754	0.658	OVER	F1PBI6
GO:0010633	negative regulation of epithelial cell migration	P	1	1	1.85185	0.144718	0.0754	0.658	OVER	F1PBI6
GO:0010632	regulation of epithelial cell migration	P	1	1	1.85185	0.144718	0.0754	0.658	OVER	F1PBI6
GO:0007263	nitric oxide mediated signal transduction	P	1	1	1.85185	0.144718	0.0754	0.658	OVER	F1PBI6
GO:0017015	regulation of transforming growth factor beta receptor signaling pathway	P	1	1	1.85185	0.144718	0.0754	0.658	OVER	F1PBI6
GO:0001968	fibronectin binding	F	1	1	1.85185	0.144718	0.0754	0.658	OVER	F1PBI6
GO:0001937	negative regulation of endothelial cell proliferation	P	1	1	1.85185	0.144718	0.0754	0.658	OVER	F1PBI6
GO:0001936	regulation of endothelial cell proliferation	P	1	1	1.85185	0.144718	0.0754	0.658	OVER	F1PBI6
GO:0001935	endothelial cell proliferation	P	1	1	1.85185	0.144718	0.0754	0.658	OVER	F1PBI6
GO:0030823	regulation of cGMP metabolic process	P	1	1	1.85185	0.144718	0.0754	0.658	OVER	F1PBI6
GO:0016597	amino acid binding	F	1	1	1.85185	0.144718	0.0754	0.658	OVER	F1PBI6
GO:0023061	signal release	P	1	1	1.85185	0.144718	0.0754	0.658	OVER	F1PGS2
GO:2000379	positive regulation of reactive oxygen species metabolic process	P	1	1	1.85185	0.144718	0.0754	0.658	OVER	F1PBI6
GO:2000377	regulation of reactive oxygen species metabolic process	P	1	1	1.85185	0.144718	0.0754	0.658	OVER	F1PBI6
GO:0034599	cellular response to oxidative stress	P	1	1	1.85185	0.144718	0.0754	0.658	OVER	F1PCG4
GO:2000353	positive regulation of endothelial cell apoptotic process	P	1	1	1.85185	0.144718	0.0754	0.658	OVER	F1PBI6
GO:2000352	negative regulation of endothelial cell apoptotic process	P	1	1	1.85185	0.144718	0.0754	0.658	OVER	F1PGS2
GO:1904036	negative regulation of epithelial cell apoptotic process	P	1	1	1.85185	0.144718	0.0754	0.658	OVER	F1PGS2
GO:0032369	negative regulation of lipid transport	P	1	1	1.85185	0.144718	0.0754	0.658	OVER	F1PBI6
GO:0042116	macrophage activation	P	1	1	1.85185	0.144718	0.0754	0.658	OVER	F1PBI6
GO:0006730	one-carbon metabolic process	P	1	1	1.85185	0.144718	0.0754	0.658	OVER	F1PBK6
GO:0061245	establishment or maintenance of bipolar cell polarity	P	1	1	1.85185	0.144718	0.0754	0.658	OVER	J9NTJ3
GO:0042108	positive regulation of cytokine biosynthetic process	P	1	1	1.85185	0.144718	0.0754	0.658	OVER	F1PBI6
GO:0042107	cytokine metabolic process	P	1	1	1.85185	0.144718	0.0754	0.658	OVER	F1PBI6
GO:0030169	low-density lipoprotein particle binding	F	1	1	1.85185	0.144718	0.0754	0.658	OVER	F1PBI6
GO:0090109	regulation of cell-substrate junction assembly	P	1	1	1.85185	0.144718	0.0754	0.658	OVER	F1PBI6
GO:0090100	positive regulation of transmembrane receptor protein serine/threonine kinase signaling pathway	P	1	1	1.85185	0.144718	0.0754	0.658	OVER	F1PBI6
GO:1903557	positive regulation of tumor necrosis factor superfamily cytokine production	P	1	1	1.85185	0.144718	0.0754	0.658	OVER	F1PBI6
GO:1903555	regulation of tumor necrosis factor superfamily cytokine production	P	1	1	1.85185	0.144718	0.0754	0.658	OVER	F1PBI6
GO:0010596	negative regulation of endothelial cell migration	P	1	1	1.85185	0.144718	0.0754	0.658	OVER	F1PBI6
GO:0010595	positive regulation of endothelial cell migration	P	1	1	1.85185	0.144718	0.0754	0.658	OVER	F1PBI6
GO:0048041	focal adhesion assembly	P	1	1	1.85185	0.144718	0.0754	0.658	OVER	F1PBI6
GO:0010594	regulation of endothelial cell migration	P	1	1	1.85185	0.144718	0.0754	0.658	OVER	F1PBI6
GO:1903532	positive regulation of secretion by cell	P	1	1	1.85185	0.144718	0.0754	0.658	OVER	F1PGS2
GO:1903524	positive regulation of blood circulation	P	1	1	1.85185	0.144718	0.0754	0.658	OVER	F1PGS2
GO:0030799	regulation of cyclic nucleotide metabolic process	P	1	1	1.85185	0.144718	0.0754	0.658	OVER	F1PBI6
GO:1903522	regulation of blood circulation	P	1	1	1.85185	0.144718	0.0754	0.658	OVER	F1PGS2
GO:0007179	transforming growth factor beta receptor signaling pathway	P	1	1	1.85185	0.144718	0.0754	0.658	OVER	F1PBI6
GO:0036066	protein O-linked fucosylation	P	1	1	1.85185	0.144718	0.0754	0.658	OVER	F1PBI6
GO:0036065	fucosylation	P	1	1	1.85185	0.144718	0.0754	0.658	OVER	F1PBI6
GO:0050922	negative regulation of chemotaxis	P	1	1	1.85185	0.144718	0.0754	0.658	OVER	F1PBI6
GO:0050921	positive regulation of chemotaxis	P	1	1	1.85185	0.144718	0.0754	0.658	OVER	F1PBI6
GO:0050920	regulation of chemotaxis	P	1	1	1.85185	0.144718	0.0754	0.658	OVER	F1PBI6
GO:0042089	cytokine biosynthetic process	P	1	1	1.85185	0.144718	0.0754	0.658	OVER	F1PBI6
GO:0090092	regulation of transmembrane receptor protein serine/threonine kinase signaling pathway	P	1	1	1.85185	0.144718	0.0754	0.658	OVER	F1PBI6
GO:0043154	negative regulation of cysteine-type endopeptidase activity involved in apoptotic process	P	1	1	1.85185	0.144718	0.0754	0.658	OVER	F1PBI6
GO:0043152	induction of bacterial agglutination	P	1	1	1.85185	0.144718	0.0754	0.658	OVER	F1PGS2
GO:0090087	regulation of peptide transport	P	1	1	1.85185	0.144718	0.0754	0.658	OVER	F1PGS2
GO:0042035	regulation of cytokine biosynthetic process	P	1	1	1.85185	0.144718	0.0754	0.658	OVER	F1PBI6
GO:0072001	renal system development	P	1	1	1.85185	0.144718	0.0754	0.658	OVER	E2RI99
GO:0030072	peptide hormone secretion	P	1	1	1.85185	0.144718	0.0754	0.658	OVER	F1PGS2
GO:0071560	cellular response to transforming growth factor beta stimulus	P	1	1	1.85185	0.144718	0.0754	0.658	OVER	F1PBI6
GO:0019079	viral genome replication	P	1	1	1.85185	0.144718	0.0754	0.658	OVER	Q9MZD3
GO:1901292	nucleoside phosphate catabolic process	P	1	1	1.85185	0.144718	0.0754	0.658	OVER	F1PPB6
GO:0071559	response to transforming growth factor beta	P	1	1	1.85185	0.144718	0.0754	0.658	OVER	F1PBI6
GO:0045921	positive regulation of exocytosis	P	1	1	1.85185	0.144718	0.0754	0.658	OVER	F1PGS2
GO:0032891	negative regulation of organic acid transport	P	1	1	1.85185	0.144718	0.0754	0.658	OVER	F1PBI6
GO:0032890	regulation of organic acid transport	P	1	1	1.85185	0.144718	0.0754	0.658	OVER	F1PBI6
GO:0045907	positive regulation of vasoconstriction	P	1	1	1.85185	0.144718	0.0754	0.658	OVER	F1PGS2
GO:0015911	plasma membrane long-chain fatty acid transport	P	1	1	1.85185	0.144718	0.0754	0.658	OVER	F1PBI6
GO:0015909	long-chain fatty acid transport	P	1	1	1.85185	0.144718	0.0754	0.658	OVER	F1PBI6
GO:0015908	fatty acid transport	P	1	1	1.85185	0.144718	0.0754	0.658	OVER	F1PBI6
GO:0009264	deoxyribonucleotide catabolic process	P	1	1	1.85185	0.144718	0.0754	0.658	OVER	F1PPB6
GO:0009262	deoxyribonucleotide metabolic process	P	1	1	1.85185	0.144718	0.0754	0.658	OVER	F1PPB6
GO:0001786	phosphatidylserine binding	F	1	1	1.85185	0.144718	0.0754	0.658	OVER	F1PBI6
GO:0050880	regulation of blood vessel size	P	1	1	1.85185	0.144718	0.0754	0.658	OVER	F1PGS2
GO:0007050	cell cycle arrest	P	1	1	1.85185	0.144718	0.0754	0.658	OVER	F1PBI6
GO:0007045	cell-substrate adherens junction assembly	P	1	1	1.85185	0.144718	0.0754	0.658	OVER	F1PBI6
GO:0007044	cell-substrate junction assembly	P	1	1	1.85185	0.144718	0.0754	0.658	OVER	F1PBI6
GO:1990748	cellular detoxification	P	1	1	1.85185	0.144718	0.0754	0.658	OVER	F1PCG4
GO:1901889	negative regulation of cell junction assembly	P	1	1	1.85185	0.144718	0.0754	0.658	OVER	F1PBI6
GO:1901888	regulation of cell junction assembly	P	1	1	1.85185	0.144718	0.0754	0.658	OVER	F1PBI6
GO:0098754	detoxification	P	1	1	1.85185	0.144718	0.0754	0.658	OVER	F1PCG4
GO:2000192	negative regulation of fatty acid transport	P	1	1	1.85185	0.144718	0.0754	0.658	OVER	F1PBI6
GO:0048521	negative regulation of behavior	P	1	1	1.85185	0.144718	0.0754	0.658	OVER	F1PBI6
GO:2000191	regulation of fatty acid transport	P	1	1	1.85185	0.144718	0.0754	0.658	OVER	F1PBI6
GO:0048520	positive regulation of behavior	P	1	1	1.85185	0.144718	0.0754	0.658	OVER	F1PBI6
GO:0016327	apicolateral plasma membrane	C	1	1	1.85185	0.144718	0.0754	0.658	OVER	J9NTJ3
GO:0016323	basolateral plasma membrane	C	1	1	1.85185	0.144718	0.0754	0.658	OVER	J9NU17
GO:2001238	positive regulation of extrinsic apoptotic signaling pathway	P	1	1	1.85185	0.144718	0.0754	0.658	OVER	F1PBI6
GO:0043032	positive regulation of macrophage activation	P	1	1	1.85185	0.144718	0.0754	0.658	OVER	F1PBI6
GO:0043030	regulation of macrophage activation	P	1	1	1.85185	0.144718	0.0754	0.658	OVER	F1PBI6
GO:0035457	cellular response to interferon-alpha	P	1	1	1.85185	0.144718	0.0754	0.658	OVER	F1PGC3
GO:0035455	response to interferon-alpha	P	1	1	1.85185	0.144718	0.0754	0.658	OVER	F1PGC3
GO:0031093	platelet alpha granule lumen	C	1	1	1.85185	0.144718	0.0754	0.658	OVER	F1PBI6
GO:0048522	positive regulation of cellular process	P	9	66	16.6667	9.55137	0.0797	0.693	OVER	"F1PE38, F1P8G0, E2R5H4, F1PBI6, J9NVE9, F1PBL4, E2RI13, F1PGS2, E2RI99"
GO:0012501	programmed cell death	P	3	14	5.55556	2.02605	0.0815	0.696	OVER	"F1PN38, F1PBI6, F1PGS2"
GO:0006461	protein complex assembly	P	3	14	5.55556	2.02605	0.0815	0.696	OVER	"F1P8G0, F1PBL4, F1PGS2"
GO:0051174	regulation of phosphorus metabolic process	P	3	14	5.55556	2.02605	0.0815	0.696	OVER	"F1PBI6, J9NVE9, F1PGS2"
GO:0070271	protein complex biogenesis	P	3	14	5.55556	2.02605	0.0815	0.696	OVER	"F1P8G0, F1PBL4, F1PGS2"
GO:0006915	apoptotic process	P	3	14	5.55556	2.02605	0.0815	0.696	OVER	"F1PN38, F1PBI6, F1PGS2"
GO:0031399	regulation of protein modification process	P	3	14	5.55556	2.02605	0.0815	0.696	OVER	"F1PBI6, J9NVE9, F1PGS2"
GO:0055085	transmembrane transport	P	3	14	5.55556	2.02605	0.0815	0.696	OVER	"F1PBI6, F1P865, Q0QEN2"
GO:0042221	response to chemical	P	7	49	12.963	7.09117	0.0845	0.72	OVER	"F1PDY8, F1PCG4, F1PBI6, J9NVE9, F1PGS2, E2RI99, F1PGC3"
GO:0009893	positive regulation of metabolic process	P	5	32	9.25926	4.63097	0.0847	0.72	OVER	"F1PBI6, J9NVE9, E2RI13, F1PGS2, E2RI99"
GO:0005198	structural molecule activity	F	4	23	7.40741	3.32851	0.0872	0.735	OVER	"F1PTS8, E2QSF4, J9P716, F1PGS2"
GO:0017111	nucleoside-triphosphatase activity	F	4	23	7.40741	3.32851	0.0872	0.735	OVER	"E2QSF4, J9NU17, J9P716, Q0QEN2"
GO:0035556	intracellular signal transduction	P	4	23	7.40741	3.32851	0.0872	0.735	OVER	"E2RIG8, F1PBI6, J9NVE9, F1PGS2"
GO:0072593	reactive oxygen species metabolic process	P	2	7	3.7037	1.01302	0.0918	0.754	OVER	"F1PCG4, F1PBI6"
GO:0032102	negative regulation of response to external stimulus	P	2	7	3.7037	1.01302	0.0918	0.754	OVER	"F1PBI6, F1PGS2"
GO:0071345	cellular response to cytokine stimulus	P	2	7	3.7037	1.01302	0.0918	0.754	OVER	"E2RI99, F1PGC3"
GO:0016829	lyase activity	F	2	7	3.7037	1.01302	0.0918	0.754	OVER	"F1PPB6, F1PBK6"
GO:0051726	regulation of cell cycle	P	2	7	3.7037	1.01302	0.0918	0.754	OVER	"F1PN38, F1PBI6"
GO:0005874	microtubule	C	2	7	3.7037	1.01302	0.0918	0.754	OVER	"E2QSF4, J9P716"
GO:0034097	response to cytokine	P	2	7	3.7037	1.01302	0.0918	0.754	OVER	"E2RI99, F1PGC3"
GO:1903035	negative regulation of response to wounding	P	2	7	3.7037	1.01302	0.0918	0.754	OVER	"F1PBI6, F1PGS2"
GO:0006355	"regulation of transcription, DNA-templated"	P	2	7	3.7037	1.01302	0.0918	0.754	OVER	"E2RI13, E2RI99"
GO:0050819	negative regulation of coagulation	P	2	7	3.7037	1.01302	0.0918	0.754	OVER	"F1PBI6, F1PGS2"
GO:0016818	"hydrolase activity, acting on acid anhydrides, in phosphorus-containing anhydrides"	F	4	24	7.40741	3.47323	0.099	0.801	OVER	"E2QSF4, J9NU17, J9P716, Q0QEN2"
GO:0016817	"hydrolase activity, acting on acid anhydrides"	F	4	24	7.40741	3.47323	0.099	0.801	OVER	"E2QSF4, J9NU17, J9P716, Q0QEN2"
GO:0070887	cellular response to chemical stimulus	P	4	24	7.40741	3.47323	0.099	0.801	OVER	"F1PCG4, F1PBI6, E2RI99, F1PGC3"
GO:0016462	pyrophosphatase activity	F	4	24	7.40741	3.47323	0.099	0.801	OVER	"E2QSF4, J9NU17, J9P716, Q0QEN2"
GO:0009966	regulation of signal transduction	P	4	24	7.40741	3.47323	0.099	0.801	OVER	"F1PN38, F1PBI6, J9NVE9, F1PGS2"
GO:0019693	ribose phosphate metabolic process	P	4	24	7.40741	3.47323	0.099	0.801	OVER	"P52784, F1PPB6, F1PBI6, Q0QEN2"
GO:0050778	positive regulation of immune response	P	0	35	0	5.06512	0.1	0.807	UNDER
GO:0002253	activation of immune response	P	0	34	0	4.92041	0.1	0.807	UNDER
GO:0048869	cellular developmental process	P	0	36	0	5.20984	0.101	0.807	UNDER
GO:0030234	enzyme regulator activity	F	0	36	0	5.20984	0.101	0.807	UNDER
GO:0050776	regulation of immune response	P	0	37	0	5.35456	0.102	0.816	UNDER
GO:0044421	extracellular region part	C	9	186	16.6667	26.9175	0.106	0.828	UNDER	"F1P8G0, F1PBI6, F1PBL4, F1PGS2, F5XVB0, F1Q432, E2RQF8, E2RRU2, F1PBK6"
GO:0009117	nucleotide metabolic process	P	4	25	7.40741	3.61795	0.112	0.828	OVER	"P52784, F1PPB6, F1PBI6, Q0QEN2"
GO:0006753	nucleoside phosphate metabolic process	P	4	25	7.40741	3.61795	0.112	0.828	OVER	"P52784, F1PPB6, F1PBI6, Q0QEN2"
GO:0016265	death	P	3	16	5.55556	2.31548	0.113	0.828	OVER	"F1PN38, F1PBI6, F1PGS2"
GO:0071310	cellular response to organic substance	P	3	16	5.55556	2.31548	0.113	0.828	OVER	"F1PBI6, E2RI99, F1PGC3"
GO:0065003	macromolecular complex assembly	P	3	16	5.55556	2.31548	0.113	0.828	OVER	"F1P8G0, F1PBL4, F1PGS2"
GO:0008283	cell proliferation	P	3	16	5.55556	2.31548	0.113	0.828	OVER	"F1PF31, F1PBI6, E2RI99"
GO:0008219	cell death	P	3	16	5.55556	2.31548	0.113	0.828	OVER	"F1PN38, F1PBI6, F1PGS2"
GO:0032270	positive regulation of cellular protein metabolic process	P	3	16	5.55556	2.31548	0.113	0.828	OVER	"F1PBI6, J9NVE9, F1PGS2"
GO:0031589	cell-substrate adhesion	P	2	8	3.7037	1.15774	0.117	0.828	OVER	"F1PBI6, F1PGS2"
GO:0031328	positive regulation of cellular biosynthetic process	P	2	8	3.7037	1.15774	0.117	0.828	OVER	"F1PBI6, E2RI13"
GO:0030155	regulation of cell adhesion	P	2	8	3.7037	1.15774	0.117	0.828	OVER	"F1PBI6, F1PGS2"
GO:0010557	positive regulation of macromolecule biosynthetic process	P	2	8	3.7037	1.15774	0.117	0.828	OVER	"F1PBI6, E2RI13"
GO:0055086	nucleobase-containing small molecule metabolic process	P	4	26	7.40741	3.76266	0.125	0.828	OVER	"P52784, F1PPB6, F1PBI6, Q0QEN2"
GO:0005856	cytoskeleton	C	6	43	11.1111	6.22287	0.126	0.828	OVER	"F1PTS8, E2QSF4, J9NTJ3, J9NU17, J9P716, C0LQL0"
GO:0044238	primary metabolic process	P	13	242	24.0741	35.0217	0.129	0.828	UNDER	"J9PB81, P52784, F1PPB6, F1PN38, E2R5H4, F1PBI6, J9NVE9, E2RI13, Q9MZD3, F1PGS2, E2QW34, E2RI99, Q0QEN2"
GO:0051247	positive regulation of protein metabolic process	P	3	17	5.55556	2.4602	0.13	0.828	OVER	"F1PBI6, J9NVE9, F1PGS2"
GO:0032101	regulation of response to external stimulus	P	3	17	5.55556	2.4602	0.13	0.828	OVER	"F1PBI6, F1PGS2, C0LQL0"
GO:1903034	regulation of response to wounding	P	3	17	5.55556	2.4602	0.13	0.828	OVER	"F1PBI6, F1PGS2, C0LQL0"
GO:0010646	regulation of cell communication	P	4	27	7.40741	3.90738	0.138	0.828	OVER	"F1PN38, F1PBI6, J9NVE9, F1PGS2"
GO:0023051	regulation of signaling	P	4	27	7.40741	3.90738	0.138	0.828	OVER	"F1PN38, F1PBI6, J9NVE9, F1PGS2"
GO:0006464	cellular protein modification process	P	6	45	11.1111	6.5123	0.139	0.828	OVER	"F1PN38, E2R5H4, F1PBI6, J9NVE9, Q9MZD3, F1PGS2"
GO:0036211	protein modification process	P	6	45	11.1111	6.5123	0.139	0.828	OVER	"F1PN38, E2R5H4, F1PBI6, J9NVE9, Q9MZD3, F1PGS2"
GO:0034220	ion transmembrane transport	P	2	9	3.7037	1.30246	0.143	0.828	OVER	"F1PBI6, Q0QEN2"
GO:0051173	positive regulation of nitrogen compound metabolic process	P	2	9	3.7037	1.30246	0.143	0.828	OVER	"F1PBI6, E2RI13"
GO:0051156	glucose 6-phosphate metabolic process	P	2	9	3.7037	1.30246	0.143	0.828	OVER	"P52784, F1PPB6"
GO:0016023	cytoplasmic membrane-bounded vesicle	C	2	9	3.7037	1.30246	0.143	0.828	OVER	"F1PBI6, F1PGS2"
GO:0010628	positive regulation of gene expression	P	2	9	3.7037	1.30246	0.143	0.828	OVER	"F1PBI6, E2RI13"
GO:0030198	extracellular matrix organization	P	2	9	3.7037	1.30246	0.143	0.828	OVER	"F1PBI6, F1Q432"
GO:0006739	NADP metabolic process	P	2	9	3.7037	1.30246	0.143	0.828	OVER	"P52784, F1PPB6"
GO:0006098	pentose-phosphate shunt	P	2	9	3.7037	1.30246	0.143	0.828	OVER	"P52784, F1PPB6"
GO:0009891	positive regulation of biosynthetic process	P	2	9	3.7037	1.30246	0.143	0.828	OVER	"F1PBI6, E2RI13"
GO:0043062	extracellular structure organization	P	2	9	3.7037	1.30246	0.143	0.828	OVER	"F1PBI6, F1Q432"
GO:2000116	regulation of cysteine-type endopeptidase activity	P	1	2	1.85185	0.289436	0.145	0.828	OVER	F1PBI6
GO:0034330	cell junction organization	P	1	2	1.85185	0.289436	0.145	0.828	OVER	F1PBI6
GO:0034329	cell junction assembly	P	1	2	1.85185	0.289436	0.145	0.828	OVER	F1PBI6
GO:0032147	activation of protein kinase activity	P	1	2	1.85185	0.289436	0.145	0.828	OVER	F1PBI6
GO:0045860	positive regulation of protein kinase activity	P	1	2	1.85185	0.289436	0.145	0.828	OVER	F1PBI6
GO:0045859	regulation of protein kinase activity	P	1	2	1.85185	0.289436	0.145	0.828	OVER	F1PBI6
GO:0044769	"ATPase activity, coupled to transmembrane movement of ions, rotational mechanism"	F	1	2	1.85185	0.289436	0.145	0.828	OVER	Q0QEN2
GO:0046933	"proton-transporting ATP synthase activity, rotational mechanism"	F	1	2	1.85185	0.289436	0.145	0.828	OVER	Q0QEN2
GO:0051222	positive regulation of protein transport	P	1	2	1.85185	0.289436	0.145	0.828	OVER	F1PGS2
GO:0072522	purine-containing compound biosynthetic process	P	1	2	1.85185	0.289436	0.145	0.828	OVER	Q0QEN2
GO:0003872	6-phosphofructokinase activity	F	1	2	1.85185	0.289436	0.145	0.828	OVER	P52784
GO:0009168	purine ribonucleoside monophosphate biosynthetic process	P	1	2	1.85185	0.289436	0.145	0.828	OVER	Q0QEN2
GO:0009163	nucleoside biosynthetic process	P	1	2	1.85185	0.289436	0.145	0.828	OVER	Q0QEN2
GO:0051897	positive regulation of protein kinase B signaling	P	1	2	1.85185	0.289436	0.145	0.828	OVER	F1PBI6
GO:0051896	regulation of protein kinase B signaling	P	1	2	1.85185	0.289436	0.145	0.828	OVER	F1PBI6
GO:0009156	ribonucleoside monophosphate biosynthetic process	P	1	2	1.85185	0.289436	0.145	0.828	OVER	Q0QEN2
GO:0009152	purine ribonucleotide biosynthetic process	P	1	2	1.85185	0.289436	0.145	0.828	OVER	Q0QEN2
GO:0009145	purine nucleoside triphosphate biosynthetic process	P	1	2	1.85185	0.289436	0.145	0.828	OVER	Q0QEN2
GO:0009142	nucleoside triphosphate biosynthetic process	P	1	2	1.85185	0.289436	0.145	0.828	OVER	Q0QEN2
GO:0050786	RAGE receptor binding	F	1	2	1.85185	0.289436	0.145	0.828	OVER	C0LQL0
GO:0001655	urogenital system development	P	1	2	1.85185	0.289436	0.145	0.828	OVER	E2RI99
GO:0009127	purine nucleoside monophosphate biosynthetic process	P	1	2	1.85185	0.289436	0.145	0.828	OVER	Q0QEN2
GO:0009124	nucleoside monophosphate biosynthetic process	P	1	2	1.85185	0.289436	0.145	0.828	OVER	Q0QEN2
GO:0050708	regulation of protein secretion	P	1	2	1.85185	0.289436	0.145	0.828	OVER	F1PGS2
GO:0010951	negative regulation of endopeptidase activity	P	1	2	1.85185	0.289436	0.145	0.828	OVER	F1PBI6
GO:1903900	regulation of viral life cycle	P	1	2	1.85185	0.289436	0.145	0.828	OVER	Q9MZD3
GO:0033178	"proton-transporting two-sector ATPase complex, catalytic domain"	C	1	2	1.85185	0.289436	0.145	0.828	OVER	Q0QEN2
GO:0034248	regulation of cellular amide metabolic process	P	1	2	1.85185	0.289436	0.145	0.828	OVER	F1PBI6
GO:0035325	Toll-like receptor binding	F	1	2	1.85185	0.289436	0.145	0.828	OVER	C0LQL0
GO:0045786	negative regulation of cell cycle	P	1	2	1.85185	0.289436	0.145	0.828	OVER	F1PBI6
GO:0006417	regulation of translation	P	1	2	1.85185	0.289436	0.145	0.828	OVER	F1PBI6
GO:0045766	positive regulation of angiogenesis	P	1	2	1.85185	0.289436	0.145	0.828	OVER	F1PBI6
GO:0042493	response to drug	P	1	2	1.85185	0.289436	0.145	0.828	OVER	F1PBI6
GO:0016832	aldehyde-lyase activity	F	1	2	1.85185	0.289436	0.145	0.828	OVER	F1PPB6
GO:0016830	carbon-carbon lyase activity	F	1	2	1.85185	0.289436	0.145	0.828	OVER	F1PPB6
GO:0043549	regulation of kinase activity	P	1	2	1.85185	0.289436	0.145	0.828	OVER	F1PBI6
GO:0043542	endothelial cell migration	P	1	2	1.85185	0.289436	0.145	0.828	OVER	F1PBI6
GO:0042455	ribonucleoside biosynthetic process	P	1	2	1.85185	0.289436	0.145	0.828	OVER	Q0QEN2
GO:0042451	purine nucleoside biosynthetic process	P	1	2	1.85185	0.289436	0.145	0.828	OVER	Q0QEN2
GO:0043534	blood vessel endothelial cell migration	P	1	2	1.85185	0.289436	0.145	0.828	OVER	F1PBI6
GO:0002696	positive regulation of leukocyte activation	P	1	2	1.85185	0.289436	0.145	0.828	OVER	F1PBI6
GO:0005945	6-phosphofructokinase complex	C	1	2	1.85185	0.289436	0.145	0.828	OVER	P52784
GO:1901659	glycosyl compound biosynthetic process	P	1	2	1.85185	0.289436	0.145	0.828	OVER	Q0QEN2
GO:0071902	positive regulation of protein serine/threonine kinase activity	P	1	2	1.85185	0.289436	0.145	0.828	OVER	F1PBI6
GO:0071900	regulation of protein serine/threonine kinase activity	P	1	2	1.85185	0.289436	0.145	0.828	OVER	F1PBI6
GO:0046129	purine ribonucleoside biosynthetic process	P	1	2	1.85185	0.289436	0.145	0.828	OVER	Q0QEN2
GO:0009615	response to virus	P	1	2	1.85185	0.289436	0.145	0.828	OVER	F1PGC3
GO:0051087	chaperone binding	F	1	2	1.85185	0.289436	0.145	0.828	OVER	F1PGS2
GO:0043491	protein kinase B signaling	P	1	2	1.85185	0.289436	0.145	0.828	OVER	F1PBI6
GO:0072378	"blood coagulation, fibrin clot formation"	P	1	2	1.85185	0.289436	0.145	0.828	OVER	F1PGS2
GO:0051046	regulation of secretion	P	1	2	1.85185	0.289436	0.145	0.828	OVER	F1PGS2
GO:0046700	heterocycle catabolic process	P	1	2	1.85185	0.289436	0.145	0.828	OVER	F1PPB6
GO:0034766	negative regulation of ion transmembrane transport	P	1	2	1.85185	0.289436	0.145	0.828	OVER	F1PBI6
GO:0034765	regulation of ion transmembrane transport	P	1	2	1.85185	0.289436	0.145	0.828	OVER	F1PBI6
GO:0034763	negative regulation of transmembrane transport	P	1	2	1.85185	0.289436	0.145	0.828	OVER	F1PBI6
GO:0034762	regulation of transmembrane transport	P	1	2	1.85185	0.289436	0.145	0.828	OVER	F1PBI6
GO:0033674	positive regulation of kinase activity	P	1	2	1.85185	0.289436	0.145	0.828	OVER	F1PBI6
GO:0043406	positive regulation of MAP kinase activity	P	1	2	1.85185	0.289436	0.145	0.828	OVER	F1PBI6
GO:0043405	regulation of MAP kinase activity	P	1	2	1.85185	0.289436	0.145	0.828	OVER	F1PBI6
GO:0051648	vesicle localization	P	1	2	1.85185	0.289436	0.145	0.828	OVER	J9NU17
GO:0051640	organelle localization	P	1	2	1.85185	0.289436	0.145	0.828	OVER	J9NU17
GO:0050544	arachidonic acid binding	F	1	2	1.85185	0.289436	0.145	0.828	OVER	C0LQL0
GO:0050543	icosatetraenoic acid binding	F	1	2	1.85185	0.289436	0.145	0.828	OVER	C0LQL0
GO:0050542	icosanoid binding	F	1	2	1.85185	0.289436	0.145	0.828	OVER	C0LQL0
GO:1901567	fatty acid derivative binding	F	1	2	1.85185	0.289436	0.145	0.828	OVER	C0LQL0
GO:0010757	negative regulation of plasminogen activation	P	1	2	1.85185	0.289436	0.145	0.828	OVER	F1PBI6
GO:0010755	regulation of plasminogen activation	P	1	2	1.85185	0.289436	0.145	0.828	OVER	F1PBI6
GO:1902600	hydrogen ion transmembrane transport	P	1	2	1.85185	0.289436	0.145	0.828	OVER	Q0QEN2
GO:0018209	peptidyl-serine modification	P	1	2	1.85185	0.289436	0.145	0.828	OVER	J9NVE9
GO:0008443	phosphofructokinase activity	F	1	2	1.85185	0.289436	0.145	0.828	OVER	P52784
GO:0000910	cytokinesis	P	1	2	1.85185	0.289436	0.145	0.828	OVER	F1PN38
GO:0034655	nucleobase-containing compound catabolic process	P	1	2	1.85185	0.289436	0.145	0.828	OVER	F1PPB6
GO:0042886	amide transport	P	1	2	1.85185	0.289436	0.145	0.828	OVER	F1PGS2
GO:0018149	peptide cross-linking	P	1	2	1.85185	0.289436	0.145	0.828	OVER	F1PBI6
GO:1902532	negative regulation of intracellular signal transduction	P	1	2	1.85185	0.289436	0.145	0.828	OVER	F1PBI6
GO:0008379	thioredoxin peroxidase activity	F	1	2	1.85185	0.289436	0.145	0.828	OVER	F1PCG4
GO:0019200	carbohydrate kinase activity	F	1	2	1.85185	0.289436	0.145	0.828	OVER	P52784
GO:0010631	epithelial cell migration	P	1	2	1.85185	0.289436	0.145	0.828	OVER	F1PBI6
GO:0018105	peptidyl-serine phosphorylation	P	1	2	1.85185	0.289436	0.145	0.828	OVER	J9NVE9
GO:0031941	filamentous actin	C	1	2	1.85185	0.289436	0.145	0.828	OVER	J9NU17
GO:0006164	purine nucleotide biosynthetic process	P	1	2	1.85185	0.289436	0.145	0.828	OVER	Q0QEN2
GO:0001953	negative regulation of cell-matrix adhesion	P	1	2	1.85185	0.289436	0.145	0.828	OVER	F1PBI6
GO:0001952	regulation of cell-matrix adhesion	P	1	2	1.85185	0.289436	0.145	0.828	OVER	F1PBI6
GO:0006140	regulation of nucleotide metabolic process	P	1	2	1.85185	0.289436	0.145	0.828	OVER	F1PBI6
GO:0043281	regulation of cysteine-type endopeptidase activity involved in apoptotic process	P	1	2	1.85185	0.289436	0.145	0.828	OVER	F1PBI6
GO:0043277	apoptotic cell clearance	P	1	2	1.85185	0.289436	0.145	0.828	OVER	F1PBI6
GO:0043271	negative regulation of ion transport	P	1	2	1.85185	0.289436	0.145	0.828	OVER	F1PBI6
GO:0043269	regulation of ion transport	P	1	2	1.85185	0.289436	0.145	0.828	OVER	F1PBI6
GO:0035662	Toll-like receptor 4 binding	F	1	2	1.85185	0.289436	0.145	0.828	OVER	C0LQL0
GO:1904037	positive regulation of epithelial cell apoptotic process	P	1	2	1.85185	0.289436	0.145	0.828	OVER	F1PBI6
GO:0006754	ATP biosynthetic process	P	1	2	1.85185	0.289436	0.145	0.828	OVER	Q0QEN2
GO:1904018	positive regulation of vasculature development	P	1	2	1.85185	0.289436	0.145	0.828	OVER	F1PBI6
GO:0030199	collagen fibril organization	P	1	2	1.85185	0.289436	0.145	0.828	OVER	F1Q432
GO:0090132	epithelium migration	P	1	2	1.85185	0.289436	0.145	0.828	OVER	F1PBI6
GO:0090130	tissue migration	P	1	2	1.85185	0.289436	0.145	0.828	OVER	F1PBI6
GO:0000187	activation of MAPK activity	P	1	2	1.85185	0.289436	0.145	0.828	OVER	F1PBI6
GO:1901361	organic cyclic compound catabolic process	P	1	2	1.85185	0.289436	0.145	0.828	OVER	F1PPB6
GO:1903530	regulation of secretion by cell	P	1	2	1.85185	0.289436	0.145	0.828	OVER	F1PGS2
GO:0070527	platelet aggregation	P	1	2	1.85185	0.289436	0.145	0.828	OVER	F1PGS2
GO:0050996	positive regulation of lipid catabolic process	P	1	2	1.85185	0.289436	0.145	0.828	OVER	J9NVE9
GO:0050994	regulation of lipid catabolic process	P	1	2	1.85185	0.289436	0.145	0.828	OVER	J9NVE9
GO:0007163	establishment or maintenance of cell polarity	P	1	2	1.85185	0.289436	0.145	0.828	OVER	J9NTJ3
GO:0036041	long-chain fatty acid binding	F	1	2	1.85185	0.289436	0.145	0.828	OVER	C0LQL0
GO:0009306	protein secretion	P	1	2	1.85185	0.289436	0.145	0.828	OVER	F1PGS2
GO:0001818	negative regulation of cytokine production	P	1	2	1.85185	0.289436	0.145	0.828	OVER	F1PBI6
GO:0006002	fructose 6-phosphate metabolic process	P	1	2	1.85185	0.289436	0.145	0.828	OVER	P52784
GO:0044270	cellular nitrogen compound catabolic process	P	1	2	1.85185	0.289436	0.145	0.828	OVER	F1PPB6
GO:0019731	antibacterial humoral response	P	1	2	1.85185	0.289436	0.145	0.828	OVER	F1PGS2
GO:0019730	antimicrobial humoral response	P	1	2	1.85185	0.289436	0.145	0.828	OVER	F1PGS2
GO:0016469	proton-transporting two-sector ATPase complex	C	1	2	1.85185	0.289436	0.145	0.828	OVER	Q0QEN2
GO:0004497	monooxygenase activity	F	1	2	1.85185	0.289436	0.145	0.828	OVER	F6X870
GO:0009914	hormone transport	P	1	2	1.85185	0.289436	0.145	0.828	OVER	F1PGS2
GO:0002274	myeloid leukocyte activation	P	1	2	1.85185	0.289436	0.145	0.828	OVER	F1PBI6
GO:0015991	ATP hydrolysis coupled proton transport	P	1	2	1.85185	0.289436	0.145	0.828	OVER	Q0QEN2
GO:0015988	"energy coupled proton transmembrane transport, against electrochemical gradient"	P	1	2	1.85185	0.289436	0.145	0.828	OVER	Q0QEN2
GO:0015986	ATP synthesis coupled proton transport	P	1	2	1.85185	0.289436	0.145	0.828	OVER	Q0QEN2
GO:0015985	"energy coupled proton transport, down electrochemical gradient"	P	1	2	1.85185	0.289436	0.145	0.828	OVER	Q0QEN2
GO:0005504	fatty acid binding	F	1	2	1.85185	0.289436	0.145	0.828	OVER	C0LQL0
GO:0051302	regulation of cell division	P	1	2	1.85185	0.289436	0.145	0.828	OVER	F1PN38
GO:0022409	positive regulation of cell-cell adhesion	P	1	2	1.85185	0.289436	0.145	0.828	OVER	F1PGS2
GO:0009260	ribonucleotide biosynthetic process	P	1	2	1.85185	0.289436	0.145	0.828	OVER	Q0QEN2
GO:0050867	positive regulation of cell activation	P	1	2	1.85185	0.289436	0.145	0.828	OVER	F1PBI6
GO:0046390	ribose phosphate biosynthetic process	P	1	2	1.85185	0.289436	0.145	0.828	OVER	Q0QEN2
GO:0009206	purine ribonucleoside triphosphate biosynthetic process	P	1	2	1.85185	0.289436	0.145	0.828	OVER	Q0QEN2
GO:0009201	ribonucleoside triphosphate biosynthetic process	P	1	2	1.85185	0.289436	0.145	0.828	OVER	Q0QEN2
GO:0045259	proton-transporting ATP synthase complex	C	1	2	1.85185	0.289436	0.145	0.828	OVER	Q0QEN2
GO:0033293	monocarboxylic acid binding	F	1	2	1.85185	0.289436	0.145	0.828	OVER	C0LQL0
GO:0045216	cell-cell junction organization	P	1	2	1.85185	0.289436	0.145	0.828	OVER	F1PBI6
GO:2001235	positive regulation of apoptotic signaling pathway	P	1	2	1.85185	0.289436	0.145	0.828	OVER	F1PBI6
GO:0043412	macromolecule modification	P	6	46	11.1111	6.65702	0.147	0.835	OVER	"F1PN38, E2R5H4, F1PBI6, J9NVE9, Q9MZD3, F1PGS2"
GO:0043170	macromolecule metabolic process	P	10	193	18.5185	27.9305	0.151	0.856	UNDER	"J9PB81, F1PN38, E2R5H4, F1PBI6, J9NVE9, E2RI13, Q9MZD3, F1PGS2, E2QW34, E2RI99"
GO:0031012	extracellular matrix	C	4	28	7.40741	4.0521	0.153	0.867	OVER	"F1PF31, F1PBI6, F5XVB0, F1Q432"
GO:0030154	cell differentiation	P	0	33	0	4.77569	0.165	0.931	UNDER
GO:0080134	regulation of response to stress	P	3	19	5.55556	2.74964	0.167	0.936	OVER	"F1PBI6, F1PGS2, C0LQL0"
GO:0009150	purine ribonucleotide metabolic process	P	3	19	5.55556	2.74964	0.167	0.936	OVER	"P52784, F1PBI6, Q0QEN2"
GO:0006163	purine nucleotide metabolic process	P	3	19	5.55556	2.74964	0.167	0.936	OVER	"P52784, F1PBI6, Q0QEN2"
GO:0009259	ribonucleotide metabolic process	P	3	19	5.55556	2.74964	0.167	0.936	OVER	"P52784, F1PBI6, Q0QEN2"
GO:0006518	peptide metabolic process	P	2	10	3.7037	1.44718	0.17	0.939	OVER	"F1PBI6, F6X870"
GO:0001071	nucleic acid binding transcription factor activity	F	2	10	3.7037	1.44718	0.17	0.939	OVER	"E2RI13, E2RI99"
GO:1901137	carbohydrate derivative biosynthetic process	P	2	10	3.7037	1.44718	0.17	0.939	OVER	"F1PBI6, Q0QEN2"
GO:1900046	regulation of hemostasis	P	2	10	3.7037	1.44718	0.17	0.939	OVER	"F1PBI6, F1PGS2"
GO:0003700	"transcription factor activity, sequence-specific DNA binding"	F	2	10	3.7037	1.44718	0.17	0.939	OVER	"E2RI13, E2RI99"
GO:0031410	cytoplasmic vesicle	C	2	10	3.7037	1.44718	0.17	0.939	OVER	"F1PBI6, F1PGS2"
GO:0010629	negative regulation of gene expression	P	2	10	3.7037	1.44718	0.17	0.939	OVER	"F1PBI6, J9NVE9"
GO:0030193	regulation of blood coagulation	P	2	10	3.7037	1.44718	0.17	0.939	OVER	"F1PBI6, F1PGS2"
GO:0009986	cell surface	C	2	10	3.7037	1.44718	0.17	0.939	OVER	"F1PBI6, F1PGS2"
GO:0005578	proteinaceous extracellular matrix	C	2	10	3.7037	1.44718	0.17	0.939	OVER	"F5XVB0, F1Q432"
GO:0019682	glyceraldehyde-3-phosphate metabolic process	P	2	10	3.7037	1.44718	0.17	0.939	OVER	"P52784, F1PPB6"
GO:0044765	single-organism transport	P	9	80	16.6667	11.5774	0.179	0.983	OVER	"P60529, J9JHF7, P60524, F1P8V6, F1PBI6, F1PGS2, J9JHZ3, F1P865, Q0QEN2"
GO:0071704	organic substance metabolic process	P	15	265	27.7778	38.3502	0.179	0.983	UNDER	"J9PB81, P52784, F1PPB6, F1PN38, E2R5H4, F1PBI6, F6X870, J9NVE9, E2RI13, Q9MZD3, F1PGS2, F1Q432, E2QW34, E2RI99, Q0QEN2"
GO:0006796	phosphate-containing compound metabolic process	P	7	57	12.963	8.24891	0.184	1	OVER	"P52784, F1PPB6, E2R5H4, F1PBI6, J9NVE9, F1PGS2, Q0QEN2"
GO:0044699	single-organism process	P	34	388	62.963	56.1505	0.186	1	OVER	"F1PDY8, F1PCG4, P52784, E2QSF4, F1PPB6, P60529, J9P6T6, J9NTJ3, J9NU17, J9JHF7, P60524, F1PF31, F1PN38, F1PE38, E2RIG8, F1P8G0, E2R5H4, F1P8V6, F1PBI6, J9P716, F6X870, J9NVE9, F1PBL4, F1PGS2, F5XVB0, J9NVT1, J9JHZ3, F1Q432, E2RQF8, F1PBK6, F1P865, E2RI99, C0LQL0, Q0QEN2"
GO:0008152	metabolic process	P	17	286	31.4815	41.3893	0.188	1	UNDER	"J9PB81, F1PCG4, P52784, F1PPB6, F1PN38, E2R5H4, F1PBI6, F6X870, J9NVE9, E2RI13, Q9MZD3, F1PGS2, F1Q432, F1PBK6, E2QW34, E2RI99, Q0QEN2"
GO:0009605	response to external stimulus	P	5	37	9.25926	5.35456	0.188	1	OVER	"J9PB81, F1PBI6, F1PGS2, F1PGC3, C0LQL0"
GO:0016310	phosphorylation	P	5	37	9.25926	5.35456	0.188	1	OVER	"P52784, E2R5H4, F1PBI6, J9NVE9, F1PGS2"
GO:0006793	phosphorus metabolic process	P	7	58	12.963	8.39363	0.189	1	OVER	"P52784, F1PPB6, E2R5H4, F1PBI6, J9NVE9, F1PGS2, Q0QEN2"
GO:0042981	regulation of apoptotic process	P	2	11	3.7037	1.5919	0.199	1	OVER	"F1PBI6, F1PGS2"
GO:0050818	regulation of coagulation	P	2	11	3.7037	1.5919	0.199	1	OVER	"F1PBI6, F1PGS2"
GO:0043067	regulation of programmed cell death	P	2	11	3.7037	1.5919	0.199	1	OVER	"F1PBI6, F1PGS2"
GO:0007165	signal transduction	P	10	92	18.5185	13.314	0.202	1	OVER	"F1PN38, E2RIG8, F1P8G0, F1PBI6, J9NVE9, F1PBL4, F1PGS2, E2RQF8, E2RI99, C0LQL0"
GO:0005737	cytoplasm	C	14	137	25.9259	19.8263	0.204	1	OVER	"J9PB81, P52784, F1PPB6, P60529, J9NU17, J9JHF7, P60524, F1PN38, F1PBI6, Q9MZD3, F1PGS2, J9JHZ3, F1PBK6, Q0QEN2"
GO:0051271	negative regulation of cellular component movement	P	1	3	1.85185	0.434153	0.21	1	OVER	F1PBI6
GO:0032103	positive regulation of response to external stimulus	P	1	3	1.85185	0.434153	0.21	1	OVER	F1PBI6
GO:0051223	regulation of protein transport	P	1	3	1.85185	0.434153	0.21	1	OVER	F1PGS2
GO:1903318	negative regulation of protein maturation	P	1	3	1.85185	0.434153	0.21	1	OVER	F1PBI6
GO:1903317	regulation of protein maturation	P	1	3	1.85185	0.434153	0.21	1	OVER	F1PBI6
GO:1901136	carbohydrate derivative catabolic process	P	1	3	1.85185	0.434153	0.21	1	OVER	F1PPB6
GO:0009165	nucleotide biosynthetic process	P	1	3	1.85185	0.434153	0.21	1	OVER	Q0QEN2
GO:1900048	positive regulation of hemostasis	P	1	3	1.85185	0.434153	0.21	1	OVER	F1PBI6
GO:0050792	regulation of viral process	P	1	3	1.85185	0.434153	0.21	1	OVER	Q9MZD3
GO:0001667	ameboidal-type cell migration	P	1	3	1.85185	0.434153	0.21	1	OVER	F1PBI6
GO:0010955	negative regulation of protein processing	P	1	3	1.85185	0.434153	0.21	1	OVER	F1PBI6
GO:0006457	protein folding	P	1	3	1.85185	0.434153	0.21	1	OVER	Q9MZD3
GO:0045785	positive regulation of cell adhesion	P	1	3	1.85185	0.434153	0.21	1	OVER	F1PGS2
GO:0015711	organic anion transport	P	1	3	1.85185	0.434153	0.21	1	OVER	F1PBI6
GO:0002683	negative regulation of immune system process	P	1	3	1.85185	0.434153	0.21	1	OVER	F1PBI6
GO:0070201	regulation of establishment of protein localization	P	1	3	1.85185	0.434153	0.21	1	OVER	F1PGS2
GO:0005938	cell cortex	C	1	3	1.85185	0.434153	0.21	1	OVER	J9NU17
GO:0010243	response to organonitrogen compound	P	1	3	1.85185	0.434153	0.21	1	OVER	E2RI99
GO:1901698	response to nitrogen compound	P	1	3	1.85185	0.434153	0.21	1	OVER	E2RI99
GO:0019439	aromatic compound catabolic process	P	1	3	1.85185	0.434153	0.21	1	OVER	F1PPB6
GO:0008543	fibroblast growth factor receptor signaling pathway	P	1	3	1.85185	0.434153	0.21	1	OVER	F1PBI6
GO:0010817	regulation of hormone levels	P	1	3	1.85185	0.434153	0.21	1	OVER	F1PGS2
GO:0010812	negative regulation of cell-substrate adhesion	P	1	3	1.85185	0.434153	0.21	1	OVER	F1PBI6
GO:0051051	negative regulation of transport	P	1	3	1.85185	0.434153	0.21	1	OVER	F1PBI6
GO:0005884	actin filament	C	1	3	1.85185	0.434153	0.21	1	OVER	J9NU17
GO:0006953	acute-phase response	P	1	3	1.85185	0.434153	0.21	1	OVER	J9NVE9
GO:0016705	"oxidoreductase activity, acting on paired donors, with incorporation or reduction of molecular oxygen"	F	1	3	1.85185	0.434153	0.21	1	OVER	F6X870
GO:0030336	negative regulation of cell migration	P	1	3	1.85185	0.434153	0.21	1	OVER	F1PBI6
GO:0005178	integrin binding	F	1	3	1.85185	0.434153	0.21	1	OVER	F1PBI6
GO:0004064	arylesterase activity	F	1	3	1.85185	0.434153	0.21	1	OVER	F1PBK6
GO:0043394	proteoglycan binding	F	1	3	1.85185	0.434153	0.21	1	OVER	F1PBI6
GO:0044448	cell cortex part	C	1	3	1.85185	0.434153	0.21	1	OVER	J9NU17
GO:0005788	endoplasmic reticulum lumen	C	1	3	1.85185	0.434153	0.21	1	OVER	F1PBI6
GO:0006818	hydrogen transport	P	1	3	1.85185	0.434153	0.21	1	OVER	Q0QEN2
GO:0006801	superoxide metabolic process	P	1	3	1.85185	0.434153	0.21	1	OVER	F1PCG4
GO:0071774	response to fibroblast growth factor	P	1	3	1.85185	0.434153	0.21	1	OVER	F1PBI6
GO:0070613	regulation of protein processing	P	1	3	1.85185	0.434153	0.21	1	OVER	F1PBI6
GO:0030864	cortical actin cytoskeleton	C	1	3	1.85185	0.434153	0.21	1	OVER	J9NU17
GO:0030863	cortical cytoskeleton	C	1	3	1.85185	0.434153	0.21	1	OVER	J9NU17
GO:0001948	glycoprotein binding	F	1	3	1.85185	0.434153	0.21	1	OVER	F1PBI6
GO:0044344	cellular response to fibroblast growth factor stimulus	P	1	3	1.85185	0.434153	0.21	1	OVER	F1PBI6
GO:0016525	negative regulation of angiogenesis	P	1	3	1.85185	0.434153	0.21	1	OVER	F1PBI6
GO:0043236	laminin binding	F	1	3	1.85185	0.434153	0.21	1	OVER	F1PBI6
GO:0030194	positive regulation of blood coagulation	P	1	3	1.85185	0.434153	0.21	1	OVER	F1PBI6
GO:0052548	regulation of endopeptidase activity	P	1	3	1.85185	0.434153	0.21	1	OVER	F1PBI6
GO:1901343	negative regulation of vasculature development	P	1	3	1.85185	0.434153	0.21	1	OVER	F1PBI6
GO:0008285	negative regulation of cell proliferation	P	1	3	1.85185	0.434153	0.21	1	OVER	F1PBI6
GO:0007178	transmembrane receptor protein serine/threonine kinase signaling pathway	P	1	3	1.85185	0.434153	0.21	1	OVER	F1PBI6
GO:0007162	negative regulation of cell adhesion	P	1	3	1.85185	0.434153	0.21	1	OVER	F1PBI6
GO:0006012	galactose metabolic process	P	1	3	1.85185	0.434153	0.21	1	OVER	P52784
GO:0015992	proton transport	P	1	3	1.85185	0.434153	0.21	1	OVER	Q0QEN2
GO:0051347	positive regulation of transferase activity	P	1	3	1.85185	0.434153	0.21	1	OVER	F1PBI6
GO:1901293	nucleoside phosphate biosynthetic process	P	1	3	1.85185	0.434153	0.21	1	OVER	Q0QEN2
GO:0019058	viral life cycle	P	1	3	1.85185	0.434153	0.21	1	OVER	Q9MZD3
GO:0051301	cell division	P	1	3	1.85185	0.434153	0.21	1	OVER	F1PN38
GO:0051918	negative regulation of fibrinolysis	P	1	3	1.85185	0.434153	0.21	1	OVER	F1PBI6
GO:0050820	positive regulation of coagulation	P	1	3	1.85185	0.434153	0.21	1	OVER	F1PBI6
GO:2000181	negative regulation of blood vessel morphogenesis	P	1	3	1.85185	0.434153	0.21	1	OVER	F1PBI6
GO:2000146	negative regulation of cell motility	P	1	3	1.85185	0.434153	0.21	1	OVER	F1PBI6
GO:0072521	purine-containing compound metabolic process	P	3	22	5.55556	3.18379	0.227	1	OVER	"P52784, F1PBI6, Q0QEN2"
GO:0006811	ion transport	P	3	22	5.55556	3.18379	0.227	1	OVER	"F1PBI6, F1P865, Q0QEN2"
GO:0061041	regulation of wound healing	P	2	12	3.7037	1.73661	0.227	1	OVER	"F1PBI6, F1PGS2"
GO:0043603	cellular amide metabolic process	P	2	12	3.7037	1.73661	0.227	1	OVER	"F1PBI6, F6X870"
GO:0005667	transcription factor complex	C	2	12	3.7037	1.73661	0.227	1	OVER	"E2RI13, E2RI99"
GO:0022402	cell cycle process	P	2	12	3.7037	1.73661	0.227	1	OVER	"F1PN38, F1PBI6"
GO:0002684	positive regulation of immune system process	P	1	43	1.85185	6.22287	0.241	1	UNDER	F1PBI6
GO:0043229	intracellular organelle	C	16	167	29.6296	24.1679	0.242	1	OVER	"J9PB81, F1PTS8, E2QSF4, J9P6T6, J9NTJ3, J9NU17, F1PN38, E2RH23, F1PBI6, J9P716, J9NWQ5, E2RI13, F1PGS2, E2RI99, C0LQL0, Q0QEN2"
GO:0004866	endopeptidase inhibitor activity	F	0	24	0	3.47323	0.246	1	UNDER
GO:0007399	nervous system development	P	0	24	0	3.47323	0.246	1	UNDER
GO:0061135	endopeptidase regulator activity	F	0	24	0	3.47323	0.246	1	UNDER
GO:0030414	peptidase inhibitor activity	F	0	25	0	3.61795	0.247	1	UNDER
GO:0002682	regulation of immune system process	P	1	48	1.85185	6.94645	0.249	1	UNDER	F1PBI6
GO:0004857	enzyme inhibitor activity	F	0	27	0	3.90738	0.254	1	UNDER
GO:0061134	peptidase regulator activity	F	0	27	0	3.90738	0.254	1	UNDER
GO:0045184	establishment of protein localization	P	2	13	3.7037	1.88133	0.256	1	OVER	"F1Q0C1, F1PGS2"
GO:0098609	cell-cell adhesion	P	2	13	3.7037	1.88133	0.256	1	OVER	"F1PE38, F1PGS2"
GO:0010941	regulation of cell death	P	2	13	3.7037	1.88133	0.256	1	OVER	"F1PBI6, F1PGS2"
GO:0009719	response to endogenous stimulus	P	2	13	3.7037	1.88133	0.256	1	OVER	"F1PBI6, E2RI99"
GO:0015075	ion transmembrane transporter activity	F	2	13	3.7037	1.88133	0.256	1	OVER	"F1P865, Q0QEN2"
GO:0015031	protein transport	P	2	13	3.7037	1.88133	0.256	1	OVER	"F1Q0C1, F1PGS2"
GO:0006081	cellular aldehyde metabolic process	P	2	13	3.7037	1.88133	0.256	1	OVER	"P52784, F1PPB6"
GO:0098805	whole membrane	C	2	13	3.7037	1.88133	0.256	1	OVER	"J9NTJ3, J9NU17"
GO:0007049	cell cycle	P	2	13	3.7037	1.88133	0.256	1	OVER	"F1PN38, F1PBI6"
GO:0004872	receptor activity	F	0	28	0	4.0521	0.259	1	UNDER
GO:0051716	cellular response to stimulus	P	12	121	22.2222	17.5109	0.26	1	OVER	"F1PCG4, F1PN38, E2RIG8, F1P8G0, F1PBI6, J9NVE9, F1PBL4, F1PGS2, E2RQF8, E2RI99, F1PGC3, C0LQL0"
GO:1902578	single-organism localization	P	9	83	16.6667	12.0116	0.263	1	OVER	"P60529, J9JHF7, P60524, F1P8V6, F1PBI6, F1PGS2, J9JHZ3, F1P865, Q0QEN2"
GO:0043933	macromolecular complex subunit organization	P	4	29	7.40741	4.19682	0.266	1	OVER	"F1P8G0, F1PBL4, F1PGS2, F1Q432"
GO:0022607	cellular component assembly	P	4	29	7.40741	4.19682	0.266	1	OVER	"F1P8G0, F1PBI6, F1PBL4, F1PGS2"
GO:0007605	sensory perception of sound	P	1	4	1.85185	0.578871	0.27	1	OVER	J9NU17
GO:0044764	multi-organism cellular process	P	1	4	1.85185	0.578871	0.27	1	OVER	Q9MZD3
GO:0008015	blood circulation	P	1	4	1.85185	0.578871	0.27	1	OVER	F1PGS2
GO:0014070	response to organic cyclic compound	P	1	4	1.85185	0.578871	0.27	1	OVER	F1PBI6
GO:0006486	protein glycosylation	P	1	4	1.85185	0.578871	0.27	1	OVER	F1PBI6
GO:0016836	hydro-lyase activity	F	1	4	1.85185	0.578871	0.27	1	OVER	F1PBK6
GO:0016835	carbon-oxygen lyase activity	F	1	4	1.85185	0.578871	0.27	1	OVER	F1PBK6
GO:0016820	"hydrolase activity, acting on acid anhydrides, catalyzing transmembrane movement of substances"	F	1	4	1.85185	0.578871	0.27	1	OVER	Q0QEN2
GO:0002694	regulation of leukocyte activation	P	1	4	1.85185	0.578871	0.27	1	OVER	F1PBI6
GO:0004842	ubiquitin-protein transferase activity	F	1	4	1.85185	0.578871	0.27	1	OVER	F1PN38
GO:0090407	organophosphate biosynthetic process	P	1	4	1.85185	0.578871	0.27	1	OVER	Q0QEN2
GO:0098542	defense response to other organism	P	1	4	1.85185	0.578871	0.27	1	OVER	F1PGS2
GO:0015078	hydrogen ion transmembrane transporter activity	F	1	4	1.85185	0.578871	0.27	1	OVER	Q0QEN2
GO:0010810	regulation of cell-substrate adhesion	P	1	4	1.85185	0.578871	0.27	1	OVER	F1PBI6
GO:0003013	circulatory system process	P	1	4	1.85185	0.578871	0.27	1	OVER	F1PGS2
GO:0043413	macromolecule glycosylation	P	1	4	1.85185	0.578871	0.27	1	OVER	F1PBI6
GO:0090303	positive regulation of wound healing	P	1	4	1.85185	0.578871	0.27	1	OVER	F1PBI6
GO:0002526	acute inflammatory response	P	1	4	1.85185	0.578871	0.27	1	OVER	J9NVE9
GO:0000302	response to reactive oxygen species	P	1	4	1.85185	0.578871	0.27	1	OVER	F1PCG4
GO:0016032	viral process	P	1	4	1.85185	0.578871	0.27	1	OVER	Q9MZD3
GO:0070085	glycosylation	P	1	4	1.85185	0.578871	0.27	1	OVER	F1PBI6
GO:0044429	mitochondrial part	C	1	4	1.85185	0.578871	0.27	1	OVER	Q0QEN2
GO:0006820	anion transport	P	1	4	1.85185	0.578871	0.27	1	OVER	F1PBI6
GO:0040013	negative regulation of locomotion	P	1	4	1.85185	0.578871	0.27	1	OVER	F1PBI6
GO:0006804	obsolete peroxidase reaction	P	1	4	1.85185	0.578871	0.27	1	OVER	F1PCG4
GO:0004601	peroxidase activity	F	1	4	1.85185	0.578871	0.27	1	OVER	F1PCG4
GO:0000226	microtubule cytoskeleton organization	P	1	4	1.85185	0.578871	0.27	1	OVER	J9NTJ3
GO:0043903	"regulation of symbiosis, encompassing mutualism through parasitism"	P	1	4	1.85185	0.578871	0.27	1	OVER	Q9MZD3
GO:0043900	regulation of multi-organism process	P	1	4	1.85185	0.578871	0.27	1	OVER	Q9MZD3
GO:0010608	posttranscriptional regulation of gene expression	P	1	4	1.85185	0.578871	0.27	1	OVER	F1PBI6
GO:0019829	cation-transporting ATPase activity	F	1	4	1.85185	0.578871	0.27	1	OVER	Q0QEN2
GO:0015405	P-P-bond-hydrolysis-driven transmembrane transporter activity	F	1	4	1.85185	0.578871	0.27	1	OVER	Q0QEN2
GO:0042742	defense response to bacterium	P	1	4	1.85185	0.578871	0.27	1	OVER	F1PGS2
GO:0019787	ubiquitin-like protein transferase activity	F	1	4	1.85185	0.578871	0.27	1	OVER	F1PN38
GO:0050954	sensory perception of mechanical stimulus	P	1	4	1.85185	0.578871	0.27	1	OVER	J9NU17
GO:0008201	heparin binding	F	1	4	1.85185	0.578871	0.27	1	OVER	F1PBI6
GO:0015399	primary active transmembrane transporter activity	F	1	4	1.85185	0.578871	0.27	1	OVER	Q0QEN2
GO:0006000	fructose metabolic process	P	1	4	1.85185	0.578871	0.27	1	OVER	P52784
GO:0005543	phospholipid binding	F	1	4	1.85185	0.578871	0.27	1	OVER	F1PBI6
GO:0005518	collagen binding	F	1	4	1.85185	0.578871	0.27	1	OVER	F1PBI6
GO:0051338	regulation of transferase activity	P	1	4	1.85185	0.578871	0.27	1	OVER	F1PBI6
GO:0022407	regulation of cell-cell adhesion	P	1	4	1.85185	0.578871	0.27	1	OVER	F1PGS2
GO:0042626	"ATPase activity, coupled to transmembrane movement of substances"	F	1	4	1.85185	0.578871	0.27	1	OVER	Q0QEN2
GO:0042625	"ATPase activity, coupled to transmembrane movement of ions"	F	1	4	1.85185	0.578871	0.27	1	OVER	Q0QEN2
GO:0010466	negative regulation of peptidase activity	P	1	4	1.85185	0.578871	0.27	1	OVER	F1PBI6
GO:0060627	regulation of vesicle-mediated transport	P	1	4	1.85185	0.578871	0.27	1	OVER	F1PGS2
GO:0050865	regulation of cell activation	P	1	4	1.85185	0.578871	0.27	1	OVER	F1PBI6
GO:0050840	extracellular matrix binding	F	1	4	1.85185	0.578871	0.27	1	OVER	F1PBI6
GO:0051920	peroxiredoxin activity	F	1	4	1.85185	0.578871	0.27	1	OVER	F1PCG4
GO:0051917	regulation of fibrinolysis	P	1	4	1.85185	0.578871	0.27	1	OVER	F1PBI6
GO:0048545	response to steroid hormone	P	1	4	1.85185	0.578871	0.27	1	OVER	F1PBI6
GO:0044459	plasma membrane part	C	4	30	7.40741	4.34153	0.273	1	OVER	"J9NTJ3, J9NU17, F1PBI6, F1PGS2"
GO:0008270	zinc ion binding	F	4	30	7.40741	4.34153	0.273	1	OVER	"J9NYN2, E2RH23, F1PBK6, C0LQL0"
GO:2000112	regulation of cellular macromolecule biosynthetic process	P	4	31	7.40741	4.48625	0.282	1	OVER	"F1PBI6, J9NVE9, E2RI13, E2RI99"
GO:0030554	adenyl nucleotide binding	F	4	31	7.40741	4.48625	0.282	1	OVER	"P52784, J9NU17, E2R5H4, Q0QEN2"
GO:0032559	adenyl ribonucleotide binding	F	4	31	7.40741	4.48625	0.282	1	OVER	"P52784, J9NU17, E2R5H4, Q0QEN2"
GO:0005524	ATP binding	F	4	31	7.40741	4.48625	0.282	1	OVER	"P52784, J9NU17, E2R5H4, Q0QEN2"
GO:0051241	negative regulation of multicellular organismal process	P	2	14	3.7037	2.02605	0.285	1	OVER	"F1PBI6, F1PGS2"
GO:0022891	substrate-specific transmembrane transporter activity	F	2	14	3.7037	2.02605	0.285	1	OVER	"F1P865, Q0QEN2"
GO:0016773	"phosphotransferase activity, alcohol group as acceptor"	F	2	14	3.7037	2.02605	0.285	1	OVER	"P52784, E2R5H4"
GO:0015630	microtubule cytoskeleton	C	2	14	3.7037	2.02605	0.285	1	OVER	"E2QSF4, J9P716"
GO:0019219	regulation of nucleobase-containing compound metabolic process	P	4	32	7.40741	4.63097	0.292	1	OVER	"F1PBI6, J9NVE9, E2RI13, E2RI99"
GO:0019637	organophosphate metabolic process	P	4	32	7.40741	4.63097	0.292	1	OVER	"P52784, F1PPB6, F1PBI6, Q0QEN2"
GO:0044700	single organism signaling	P	10	96	18.5185	13.8929	0.294	1	OVER	"F1PN38, E2RIG8, F1P8G0, F1PBI6, J9NVE9, F1PBL4, F1PGS2, E2RQF8, E2RI99, C0LQL0"
GO:0023052	signaling	P	10	98	18.5185	14.1823	0.3	1	OVER	"F1PN38, E2RIG8, F1P8G0, F1PBI6, J9NVE9, F1PBL4, F1PGS2, E2RQF8, E2RI99, C0LQL0"
GO:0070011	"peptidase activity, acting on L-amino acid peptides"	F	2	58	3.7037	8.39363	0.3	1	UNDER	"J9PB81, E2QW34"
GO:0007154	cell communication	P	10	99	18.5185	14.3271	0.303	1	OVER	"F1PN38, E2RIG8, F1P8G0, F1PBI6, J9NVE9, F1PBL4, F1PGS2, E2RQF8, E2RI99, C0LQL0"
GO:0008233	peptidase activity	F	2	61	3.7037	8.82779	0.305	1	UNDER	"J9PB81, E2QW34"
GO:0010556	regulation of macromolecule biosynthetic process	P	4	34	7.40741	4.92041	0.314	1	OVER	"F1PBI6, J9NVE9, E2RI13, E2RI99"
GO:0003008	system process	P	2	15	3.7037	2.17077	0.315	1	OVER	"J9NU17, F1PGS2"
GO:1901566	organonitrogen compound biosynthetic process	P	2	15	3.7037	2.17077	0.315	1	OVER	"F1PBI6, Q0QEN2"
GO:0016301	kinase activity	F	2	15	3.7037	2.17077	0.315	1	OVER	"P52784, E2R5H4"
GO:0006810	transport	P	10	102	18.5185	14.7612	0.316	1	OVER	"F1Q0C1, P60529, J9JHF7, P60524, F1P8V6, F1PBI6, F1PGS2, J9JHZ3, F1P865, Q0QEN2"
GO:0046872	metal ion binding	F	11	109	20.3704	15.7742	0.32	1	OVER	"P60529, J9JHF7, P60524, F1PE38, J9NYN2, E2RH23, F1PBI6, J9NWQ5, J9JHZ3, F1PBK6, C0LQL0"
GO:0051272	positive regulation of cellular component movement	P	1	5	1.85185	0.723589	0.325	1	OVER	F1PBI6
GO:0061024	membrane organization	P	1	5	1.85185	0.723589	0.325	1	OVER	F1PBI6
GO:0045834	positive regulation of lipid metabolic process	P	1	5	1.85185	0.723589	0.325	1	OVER	J9NVE9
GO:0061695	"transferase complex, transferring phosphorus-containing groups"	C	1	5	1.85185	0.723589	0.325	1	OVER	P52784
GO:0009101	glycoprotein biosynthetic process	P	1	5	1.85185	0.723589	0.325	1	OVER	F1PBI6
GO:0009100	glycoprotein metabolic process	P	1	5	1.85185	0.723589	0.325	1	OVER	F1PBI6
GO:0050727	regulation of inflammatory response	P	1	5	1.85185	0.723589	0.325	1	OVER	C0LQL0
GO:0010942	positive regulation of cell death	P	1	5	1.85185	0.723589	0.325	1	OVER	F1PBI6
GO:1901701	cellular response to oxygen-containing compound	P	1	5	1.85185	0.723589	0.325	1	OVER	F1PCG4
GO:0045765	regulation of angiogenesis	P	1	5	1.85185	0.723589	0.325	1	OVER	F1PBI6
GO:0071363	cellular response to growth factor stimulus	P	1	5	1.85185	0.723589	0.325	1	OVER	F1PBI6
GO:0051129	negative regulation of cellular component organization	P	1	5	1.85185	0.723589	0.325	1	OVER	F1PBI6
GO:0070848	response to growth factor	P	1	5	1.85185	0.723589	0.325	1	OVER	F1PBI6
GO:0015077	monovalent inorganic cation transmembrane transporter activity	F	1	5	1.85185	0.723589	0.325	1	OVER	Q0QEN2
GO:0043492	"ATPase activity, coupled to movement of substances"	F	1	5	1.85185	0.723589	0.325	1	OVER	Q0QEN2
GO:0034109	homotypic cell-cell adhesion	P	1	5	1.85185	0.723589	0.325	1	OVER	F1PGS2
GO:0015672	monovalent inorganic cation transport	P	1	5	1.85185	0.723589	0.325	1	OVER	Q0QEN2
GO:0006979	response to oxidative stress	P	1	5	1.85185	0.723589	0.325	1	OVER	F1PCG4
GO:0030335	positive regulation of cell migration	P	1	5	1.85185	0.723589	0.325	1	OVER	F1PBI6
GO:0044433	cytoplasmic vesicle part	C	1	5	1.85185	0.723589	0.325	1	OVER	F1PBI6
GO:0044419	interspecies interaction between organisms	P	1	5	1.85185	0.723589	0.325	1	OVER	Q9MZD3
GO:1903036	positive regulation of response to wounding	P	1	5	1.85185	0.723589	0.325	1	OVER	F1PBI6
GO:0044403	"symbiosis, encompassing mutualism through parasitism"	P	1	5	1.85185	0.723589	0.325	1	OVER	Q9MZD3
GO:0040017	positive regulation of locomotion	P	1	5	1.85185	0.723589	0.325	1	OVER	F1PBI6
GO:0042803	protein homodimerization activity	F	1	5	1.85185	0.723589	0.325	1	OVER	F1PE38
GO:0019882	antigen processing and presentation	P	1	5	1.85185	0.723589	0.325	1	OVER	F1PBI6
GO:0052547	regulation of peptidase activity	P	1	5	1.85185	0.723589	0.325	1	OVER	F1PBI6
GO:1901342	regulation of vasculature development	P	1	5	1.85185	0.723589	0.325	1	OVER	F1PBI6
GO:0010564	regulation of cell cycle process	P	1	5	1.85185	0.723589	0.325	1	OVER	F1PN38
GO:0007156	homophilic cell adhesion via plasma membrane adhesion molecules	P	1	5	1.85185	0.723589	0.325	1	OVER	F1PE38
GO:0001819	positive regulation of cytokine production	P	1	5	1.85185	0.723589	0.325	1	OVER	F1PBI6
GO:0006013	mannose metabolic process	P	1	5	1.85185	0.723589	0.325	1	OVER	P52784
GO:0045321	leukocyte activation	P	1	5	1.85185	0.723589	0.325	1	OVER	F1PBI6
GO:0051346	negative regulation of hydrolase activity	P	1	5	1.85185	0.723589	0.325	1	OVER	F1PBI6
GO:0033993	response to lipid	P	1	5	1.85185	0.723589	0.325	1	OVER	F1PBI6
GO:0032880	regulation of protein localization	P	1	5	1.85185	0.723589	0.325	1	OVER	F1PGS2
GO:0098742	cell-cell adhesion via plasma-membrane adhesion molecules	P	1	5	1.85185	0.723589	0.325	1	OVER	F1PE38
GO:0009896	positive regulation of catabolic process	P	1	5	1.85185	0.723589	0.325	1	OVER	J9NVE9
GO:0043068	positive regulation of programmed cell death	P	1	5	1.85185	0.723589	0.325	1	OVER	F1PBI6
GO:0043065	positive regulation of apoptotic process	P	1	5	1.85185	0.723589	0.325	1	OVER	F1PBI6
GO:2000147	positive regulation of cell motility	P	1	5	1.85185	0.723589	0.325	1	OVER	F1PBI6
GO:1901135	carbohydrate derivative metabolic process	P	4	35	7.40741	5.06512	0.326	1	OVER	"P52784, F1PPB6, F1PBI6, Q0QEN2"
GO:0034654	nucleobase-containing compound biosynthetic process	P	4	35	7.40741	5.06512	0.326	1	OVER	"J9NVE9, E2RI13, E2RI99, Q0QEN2"
GO:0043169	cation binding	F	11	112	20.3704	16.2084	0.328	1	OVER	"P60529, J9JHF7, P60524, F1PE38, J9NYN2, E2RH23, F1PBI6, J9NWQ5, J9JHZ3, F1PBK6, C0LQL0"
GO:0002376	immune system process	P	6	121	11.1111	17.5109	0.341	1	UNDER	"J9PB81, J9P0D4, F1P9M6, F1PBI6, F1PGS2, C0LQL0"
GO:0006139	nucleobase-containing compound metabolic process	P	7	69	12.963	9.98553	0.343	1	OVER	"P52784, F1PPB6, F1PBI6, J9NVE9, E2RI13, E2RI99, Q0QEN2"
GO:0008092	cytoskeletal protein binding	F	2	16	3.7037	2.31548	0.343	1	OVER	"J9NTJ3, C0LQL0"
GO:0022857	transmembrane transporter activity	F	2	16	3.7037	2.31548	0.343	1	OVER	"F1P865, Q0QEN2"
GO:0048585	negative regulation of response to stimulus	P	2	16	3.7037	2.31548	0.343	1	OVER	"F1PBI6, F1PGS2"
GO:0006082	organic acid metabolic process	P	1	38	1.85185	5.49928	0.349	1	UNDER	P52784
GO:0006996	organelle organization	P	1	37	1.85185	5.35456	0.35	1	UNDER	J9NTJ3
GO:0043436	oxoacid metabolic process	P	1	37	1.85185	5.35456	0.35	1	UNDER	P52784
GO:0044271	cellular nitrogen compound biosynthetic process	P	5	43	9.25926	6.22287	0.362	1	OVER	"F1PBI6, J9NVE9, E2RI13, E2RI99, Q0QEN2"
GO:0051649	establishment of localization in cell	P	2	17	3.7037	2.4602	0.372	1	OVER	"F1PBI6, F1PGS2"
GO:2000113	negative regulation of cellular macromolecule biosynthetic process	P	1	6	1.85185	0.868307	0.377	1	OVER	J9NVE9
GO:0046983	protein dimerization activity	F	1	6	1.85185	0.868307	0.377	1	OVER	F1PE38
GO:0045893	"positive regulation of transcription, DNA-templated"	P	1	6	1.85185	0.868307	0.377	1	OVER	E2RI13
GO:0045892	"negative regulation of transcription, DNA-templated"	P	1	6	1.85185	0.868307	0.377	1	OVER	J9NVE9
GO:0051254	positive regulation of RNA metabolic process	P	1	6	1.85185	0.868307	0.377	1	OVER	E2RI13
GO:0051253	negative regulation of RNA metabolic process	P	1	6	1.85185	0.868307	0.377	1	OVER	J9NVE9
GO:0043604	amide biosynthetic process	P	1	6	1.85185	0.868307	0.377	1	OVER	F1PBI6
GO:0098636	protein complex involved in cell adhesion	C	1	6	1.85185	0.868307	0.377	1	OVER	F1PBI6
GO:0006412	translation	P	1	6	1.85185	0.868307	0.377	1	OVER	F1PBI6
GO:0051172	negative regulation of nitrogen compound metabolic process	P	1	6	1.85185	0.868307	0.377	1	OVER	J9NVE9
GO:0001525	angiogenesis	P	1	6	1.85185	0.868307	0.377	1	OVER	F1PBI6
GO:0045095	keratin filament	C	1	6	1.85185	0.868307	0.377	1	OVER	F1PTS8
GO:1901681	sulfur compound binding	F	1	6	1.85185	0.868307	0.377	1	OVER	F1PBI6
GO:0022804	active transmembrane transporter activity	F	1	6	1.85185	0.868307	0.377	1	OVER	Q0QEN2
GO:0051093	negative regulation of developmental process	P	1	6	1.85185	0.868307	0.377	1	OVER	F1PBI6
GO:0051050	positive regulation of transport	P	1	6	1.85185	0.868307	0.377	1	OVER	F1PGS2
GO:1902680	positive regulation of RNA biosynthetic process	P	1	6	1.85185	0.868307	0.377	1	OVER	E2RI13
GO:1902679	negative regulation of RNA biosynthetic process	P	1	6	1.85185	0.868307	0.377	1	OVER	J9NVE9
GO:0016684	"oxidoreductase activity, acting on peroxide as acceptor"	F	1	6	1.85185	0.868307	0.377	1	OVER	F1PCG4
GO:0044432	endoplasmic reticulum part	C	1	6	1.85185	0.868307	0.377	1	OVER	F1PBI6
GO:0032446	protein modification by small protein conjugation	P	1	6	1.85185	0.868307	0.377	1	OVER	F1PN38
GO:0031347	regulation of defense response	P	1	6	1.85185	0.868307	0.377	1	OVER	C0LQL0
GO:0070647	protein modification by small protein conjugation or removal	P	1	6	1.85185	0.868307	0.377	1	OVER	F1PN38
GO:0071705	nitrogen compound transport	P	1	6	1.85185	0.868307	0.377	1	OVER	F1PGS2
GO:0008305	integrin complex	C	1	6	1.85185	0.868307	0.377	1	OVER	F1PBI6
GO:0019838	growth factor binding	F	1	6	1.85185	0.868307	0.377	1	OVER	F1PBI6
GO:0016567	protein ubiquitination	P	1	6	1.85185	0.868307	0.377	1	OVER	F1PN38
GO:1990234	transferase complex	C	1	6	1.85185	0.868307	0.377	1	OVER	P52784
GO:1903508	positive regulation of nucleic acid-templated transcription	P	1	6	1.85185	0.868307	0.377	1	OVER	E2RI13
GO:1903507	negative regulation of nucleic acid-templated transcription	P	1	6	1.85185	0.868307	0.377	1	OVER	J9NVE9
GO:0016459	myosin complex	C	1	6	1.85185	0.868307	0.377	1	OVER	J9NU17
GO:0090066	regulation of anatomical structure size	P	1	6	1.85185	0.868307	0.377	1	OVER	F1PGS2
GO:0005539	glycosaminoglycan binding	F	1	6	1.85185	0.868307	0.377	1	OVER	F1PBI6
GO:0045934	negative regulation of nucleobase-containing compound metabolic process	P	1	6	1.85185	0.868307	0.377	1	OVER	J9NVE9
GO:0009894	regulation of catabolic process	P	1	6	1.85185	0.868307	0.377	1	OVER	J9NVE9
GO:0043043	peptide biosynthetic process	P	1	6	1.85185	0.868307	0.377	1	OVER	F1PBI6
GO:0044767	single-organism developmental process	P	4	85	7.40741	12.301	0.382	1	UNDER	"E2R5H4, F1PBI6, J9NVT1, E2RI99"
GO:0032502	developmental process	P	4	86	7.40741	12.4457	0.382	1	UNDER	"E2R5H4, F1PBI6, J9NVT1, E2RI99"
GO:1901605	alpha-amino acid metabolic process	P	0	18	0	2.60492	0.387	1	UNDER
GO:0048878	chemical homeostasis	P	0	18	0	2.60492	0.387	1	UNDER
GO:0006520	cellular amino acid metabolic process	P	0	20	0	2.89436	0.39	1	UNDER
GO:0048468	cell development	P	0	20	0	2.89436	0.39	1	UNDER
GO:0005654	nucleoplasm	C	0	21	0	3.03907	0.394	1	UNDER
GO:0044446	intracellular organelle part	C	9	92	16.6667	13.314	0.395	1	OVER	"F1PTS8, E2QSF4, J9NTJ3, J9NU17, F1PBI6, J9P716, E2RI99, C0LQL0, Q0QEN2"
GO:0044422	organelle part	C	9	94	16.6667	13.6035	0.402	1	OVER	"F1PTS8, E2QSF4, J9NTJ3, J9NU17, F1PBI6, J9P716, E2RI99, C0LQL0, Q0QEN2"
GO:0051641	cellular localization	P	3	23	5.55556	3.32851	0.407	1	OVER	"J9NU17, F1PBI6, F1PGS2"
GO:0005615	extracellular space	C	5	96	9.25926	13.8929	0.412	1	UNDER	"F1P8G0, F1PBI6, F1PBL4, F1PGS2, E2RQF8"
GO:0051234	establishment of localization	P	10	103	18.5185	14.9059	0.416	1	OVER	"F1Q0C1, P60529, J9JHF7, P60524, F1P8V6, F1PBI6, F1PGS2, J9JHZ3, F1P865, Q0QEN2"
GO:0031224	intrinsic component of membrane	C	2	51	3.7037	7.38061	0.416	1	UNDER	"J9NZW6, F1PBI6"
GO:0071495	cellular response to endogenous stimulus	P	1	7	1.85185	1.01302	0.424	1	OVER	F1PBI6
GO:0045861	negative regulation of proteolysis	P	1	7	1.85185	1.01302	0.424	1	OVER	F1PBI6
GO:0016209	antioxidant activity	F	1	7	1.85185	1.01302	0.424	1	OVER	F1PCG4
GO:0003774	motor activity	F	1	7	1.85185	1.01302	0.424	1	OVER	J9NU17
GO:0009617	response to bacterium	P	1	7	1.85185	1.01302	0.424	1	OVER	F1PGS2
GO:0060326	cell chemotaxis	P	1	7	1.85185	1.01302	0.424	1	OVER	F1PBI6
GO:0031327	negative regulation of cellular biosynthetic process	P	1	7	1.85185	1.01302	0.424	1	OVER	J9NVE9
GO:0007267	cell-cell signaling	P	1	7	1.85185	1.01302	0.424	1	OVER	F1PGS2
GO:0045454	cell redox homeostasis	P	1	7	1.85185	1.01302	0.424	1	OVER	F1PCG4
GO:0010558	negative regulation of macromolecule biosynthetic process	P	1	7	1.85185	1.01302	0.424	1	OVER	J9NVE9
GO:0098802	plasma membrane receptor complex	C	1	7	1.85185	1.01302	0.424	1	OVER	F1PBI6
GO:0044242	cellular lipid catabolic process	P	1	7	1.85185	1.01302	0.424	1	OVER	J9NVE9
GO:0045935	positive regulation of nucleobase-containing compound metabolic process	P	1	7	1.85185	1.01302	0.424	1	OVER	E2RI13
GO:0009890	negative regulation of biosynthetic process	P	1	7	1.85185	1.01302	0.424	1	OVER	J9NVE9
GO:0043086	negative regulation of catalytic activity	P	1	7	1.85185	1.01302	0.424	1	OVER	F1PBI6
GO:0043085	positive regulation of catalytic activity	P	1	7	1.85185	1.01302	0.424	1	OVER	F1PBI6
GO:0048514	blood vessel morphogenesis	P	1	7	1.85185	1.01302	0.424	1	OVER	F1PBI6
GO:0032268	regulation of cellular protein metabolic process	P	3	25	5.55556	3.61795	0.426	1	OVER	"F1PBI6, J9NVE9, F1PGS2"
GO:0043226	organelle	C	21	242	38.8889	35.0217	0.448	1	OVER	"J9PB81, F1PTS8, E2QSF4, J9P6T6, J9NTJ3, J9NU17, F1PN38, J9NYN2, E2RH23, F1PBI6, J9P716, J9NWQ5, E2RI13, F1P6P2, Q9MZD3, F1PGS2, F5XVB0, F1PBK6, E2RI99, C0LQL0, Q0QEN2"
GO:0043232	intracellular non-membrane-bounded organelle	C	6	62	11.1111	8.9725	0.453	1	OVER	"F1PTS8, E2QSF4, J9NTJ3, J9NU17, J9P716, C0LQL0"
GO:0043228	non-membrane-bounded organelle	C	6	62	11.1111	8.9725	0.453	1	OVER	"F1PTS8, E2QSF4, J9NTJ3, J9NU17, J9P716, C0LQL0"
GO:0006355	"regulation of transcription, DNA-templated"	P	3	28	5.55556	4.0521	0.461	1	OVER	"J9NVE9, E2RI13, E2RI99"
GO:0010033	response to organic substance	P	3	28	5.55556	4.0521	0.461	1	OVER	"F1PBI6, E2RI99, F1PGC3"
GO:1903506	regulation of nucleic acid-templated transcription	P	3	28	5.55556	4.0521	0.461	1	OVER	"J9NVE9, E2RI13, E2RI99"
GO:0006955	immune response	P	3	64	5.55556	9.26194	0.463	1	UNDER	"F1PBI6, F1PGS2, C0LQL0"
GO:0031988	membrane-bounded vesicle	C	3	68	5.55556	9.84081	0.465	1	UNDER	"F1PBI6, F1PGS2, F1PBK6"
GO:0044702	single organism reproductive process	P	1	8	1.85185	1.15774	0.468	1	OVER	J9NVT1
GO:0098662	inorganic cation transmembrane transport	P	1	8	1.85185	1.15774	0.468	1	OVER	Q0QEN2
GO:0098660	inorganic ion transmembrane transport	P	1	8	1.85185	1.15774	0.468	1	OVER	Q0QEN2
GO:0098655	cation transmembrane transport	P	1	8	1.85185	1.15774	0.468	1	OVER	Q0QEN2
GO:0001568	blood vessel development	P	1	8	1.85185	1.15774	0.468	1	OVER	F1PBI6
GO:0060341	regulation of cellular localization	P	1	8	1.85185	1.15774	0.468	1	OVER	F1PGS2
GO:0005739	mitochondrion	C	1	8	1.85185	1.15774	0.468	1	OVER	Q0QEN2
GO:0019216	regulation of lipid metabolic process	P	1	8	1.85185	1.15774	0.468	1	OVER	J9NVE9
GO:0042802	identical protein binding	F	1	8	1.85185	1.15774	0.468	1	OVER	F1PE38
GO:0007264	small GTPase mediated signal transduction	P	1	8	1.85185	1.15774	0.468	1	OVER	E2RIG8
GO:0001817	regulation of cytokine production	P	1	8	1.85185	1.15774	0.468	1	OVER	F1PBI6
GO:0001816	cytokine production	P	1	8	1.85185	1.15774	0.468	1	OVER	F1PBI6
GO:0046434	organophosphate catabolic process	P	1	8	1.85185	1.15774	0.468	1	OVER	F1PPB6
GO:0022414	reproductive process	P	1	8	1.85185	1.15774	0.468	1	OVER	J9NVT1
GO:0016337	single organismal cell-cell adhesion	P	1	8	1.85185	1.15774	0.468	1	OVER	F1PGS2
GO:0019538	protein metabolic process	P	8	141	14.8148	20.4052	0.473	1	UNDER	"J9PB81, F1PN38, E2R5H4, F1PBI6, J9NVE9, Q9MZD3, F1PGS2, E2QW34"
GO:2001141	regulation of RNA biosynthetic process	P	3	29	5.55556	4.19682	0.474	1	OVER	"J9NVE9, E2RI13, E2RI99"
GO:0051252	regulation of RNA metabolic process	P	3	30	5.55556	4.34153	0.488	1	OVER	"J9NVE9, E2RI13, E2RI99"
GO:0051246	regulation of protein metabolic process	P	3	30	5.55556	4.34153	0.488	1	OVER	"F1PBI6, J9NVE9, F1PGS2"
GO:0046483	heterocycle metabolic process	P	7	76	12.963	10.9986	0.496	1	OVER	"P52784, F1PPB6, F1PBI6, J9NVE9, E2RI13, E2RI99, Q0QEN2"
GO:0006629	lipid metabolic process	P	1	32	1.85185	4.63097	0.502	1	UNDER	J9NVE9
GO:0006351	"transcription, DNA-templated"	P	3	31	5.55556	4.48625	0.502	1	OVER	"J9NVE9, E2RI13, E2RI99"
GO:0071702	organic substance transport	P	3	31	5.55556	4.48625	0.502	1	OVER	"F1Q0C1, F1PBI6, F1PGS2"
GO:0097659	nucleic acid-templated transcription	P	3	31	5.55556	4.48625	0.502	1	OVER	"J9NVE9, E2RI13, E2RI99"
GO:0044428	nuclear part	C	1	33	1.85185	4.77569	0.502	1	UNDER	E2RI99
GO:0006950	response to stress	P	8	83	14.8148	12.0116	0.503	1	OVER	"F1PCG4, F1P8G0, F1PBI6, J9NVE9, F1PBL4, F1PGS2, F5XVB0, C0LQL0"
GO:0009653	anatomical structure morphogenesis	P	1	35	1.85185	5.06512	0.507	1	UNDER	F1PBI6
GO:0019752	carboxylic acid metabolic process	P	1	35	1.85185	5.06512	0.507	1	UNDER	P52784
GO:0034641	cellular nitrogen compound metabolic process	P	8	85	14.8148	12.301	0.508	1	OVER	"P52784, F1PPB6, F1PBI6, F6X870, J9NVE9, E2RI13, E2RI99, Q0QEN2"
GO:0007600	sensory perception	P	1	9	1.85185	1.30246	0.509	1	OVER	J9NU17
GO:0044087	regulation of cellular component biogenesis	P	1	9	1.85185	1.30246	0.509	1	OVER	F1PBI6
GO:0098602	single organism cell adhesion	P	1	9	1.85185	1.30246	0.509	1	OVER	F1PGS2
GO:0009725	response to hormone	P	1	9	1.85185	1.30246	0.509	1	OVER	F1PBI6
GO:0016853	isomerase activity	F	1	9	1.85185	1.30246	0.509	1	OVER	Q9MZD3
GO:0045087	innate immune response	P	1	9	1.85185	1.30246	0.509	1	OVER	C0LQL0
GO:0030334	regulation of cell migration	P	1	9	1.85185	1.30246	0.509	1	OVER	F1PBI6
GO:0004672	protein kinase activity	F	1	9	1.85185	1.30246	0.509	1	OVER	E2R5H4
GO:0032368	regulation of lipid transport	P	1	9	1.85185	1.30246	0.509	1	OVER	F1PBI6
GO:0042623	"ATPase activity, coupled"	F	1	9	1.85185	1.30246	0.509	1	OVER	Q0QEN2
GO:0050877	neurological system process	P	1	9	1.85185	1.30246	0.509	1	OVER	J9NU17
GO:2000145	regulation of cell motility	P	1	9	1.85185	1.30246	0.509	1	OVER	F1PBI6
GO:0051171	regulation of nitrogen compound metabolic process	P	4	37	7.40741	5.35456	0.515	1	OVER	"F1PBI6, J9NVE9, E2RI13, E2RI99"
GO:0019438	aromatic compound biosynthetic process	P	4	37	7.40741	5.35456	0.515	1	OVER	"J9NVE9, E2RI13, E2RI99, Q0QEN2"
GO:0031326	regulation of cellular biosynthetic process	P	4	37	7.40741	5.35456	0.515	1	OVER	"F1PBI6, J9NVE9, E2RI13, E2RI99"
GO:0018130	heterocycle biosynthetic process	P	4	37	7.40741	5.35456	0.515	1	OVER	"J9NVE9, E2RI13, E2RI99, Q0QEN2"
GO:1901362	organic cyclic compound biosynthetic process	P	4	37	7.40741	5.35456	0.515	1	OVER	"J9NVE9, E2RI13, E2RI99, Q0QEN2"
GO:0043227	membrane-bounded organelle	C	12	190	22.2222	27.4964	0.519	1	UNDER	"J9PB81, J9P6T6, J9NYN2, E2RH23, F1PBI6, E2RI13, Q9MZD3, F1PGS2, F5XVB0, F1PBK6, E2RI99, Q0QEN2"
GO:0010468	regulation of gene expression	P	4	38	7.40741	5.49928	0.52	1	OVER	"F1PBI6, J9NVE9, E2RI13, E2RI99"
GO:0044085	cellular component biogenesis	P	4	39	7.40741	5.64399	0.526	1	OVER	"F1P8G0, F1PBI6, F1PBL4, F1PGS2"
GO:0009889	regulation of biosynthetic process	P	4	39	7.40741	5.64399	0.526	1	OVER	"F1PBI6, J9NVE9, E2RI13, E2RI99"
GO:0044444	cytoplasmic part	C	9	96	16.6667	13.8929	0.53	1	OVER	"P52784, P60529, J9NU17, J9JHF7, P60524, F1PBI6, F1PGS2, J9JHZ3, Q0QEN2"
GO:0005488	binding	F	37	460	68.5185	66.5702	0.535	1	OVER	"P52784, J9P0D4, E2QSF4, P60529, J9NTJ3, J9NU17, J9JHF7, P60524, F1P9M6, F1PF31, F1PN38, F1P8A6, F1PE38, J9NYN2, E2RIG8, E2RH23, F1P8G0, E2R5H4, F1P8V6, E2RP87, F1PBI6, J9P716, F6X870, F1PBL4, J9NWQ5, F1P6P2, F1PGS2, F5XVB0, J9NVT1, J9JHZ3, F1Q432, E2RQF8, F1PBK6, E2RI99, F1PGC3, C0LQL0, Q0QEN2"
GO:0051270	regulation of cellular component movement	P	1	10	1.85185	1.44718	0.546	1	OVER	F1PBI6
GO:0072562	blood microparticle	C	1	10	1.85185	1.44718	0.546	1	OVER	F1PGS2
GO:0044092	negative regulation of molecular function	P	1	10	1.85185	1.44718	0.546	1	OVER	F1PBI6
GO:0040012	regulation of locomotion	P	1	10	1.85185	1.44718	0.546	1	OVER	F1PBI6
GO:0001944	vasculature development	P	1	10	1.85185	1.44718	0.546	1	OVER	F1PBI6
GO:0043235	receptor complex	C	1	10	1.85185	1.44718	0.546	1	OVER	F1PBI6
GO:0032269	negative regulation of cellular protein metabolic process	P	1	10	1.85185	1.44718	0.546	1	OVER	F1PBI6
GO:0006952	defense response	P	4	42	7.40741	6.07815	0.548	1	OVER	"F1PBI6, J9NVE9, F1PGS2, C0LQL0"
GO:0065007	biological regulation	P	20	297	37.037	42.9812	0.558	1	UNDER	"F1PDY8, F1PCG4, J9NTJ3, F1PF31, F1PN38, F1PE38, E2RIG8, F1P8G0, E2R5H4, F1PBI6, J9NVE9, F1PBL4, J9NWQ5, E2RI13, Q9MZD3, F1PGS2, F5XVB0, E2RQF8, E2RI99, C0LQL0"
GO:0005515	protein binding	F	26	313	48.1481	45.2967	0.56	1	OVER	"P52784, J9P0D4, J9NTJ3, J9NU17, F1P9M6, F1PF31, F1PN38, F1P8A6, F1PE38, E2RH23, F1P8G0, E2R5H4, E2RP87, F1PBI6, F6X870, F1PBL4, J9NWQ5, F1P6P2, F1PGS2, F5XVB0, J9NVT1, F1Q432, E2RQF8, F1PBK6, F1PGC3, C0LQL0"
GO:0003676	nucleic acid binding	F	2	48	3.7037	6.94645	0.569	1	UNDER	"E2RI99, F1PGC3"
GO:0048518	positive regulation of biological process	P	11	123	20.3704	17.8003	0.57	1	OVER	"F1PDY8, F1PE38, F1P8G0, E2R5H4, F1PBI6, J9NVE9, F1PBL4, E2RI13, F1PGS2, E2RI99, C0LQL0"
GO:0004175	endopeptidase activity	F	2	49	3.7037	7.09117	0.571	1	UNDER	"J9PB81, E2QW34"
GO:0016021	integral component of membrane	C	2	49	3.7037	7.09117	0.571	1	UNDER	"J9NZW6, F1PBI6"
GO:0051248	negative regulation of protein metabolic process	P	1	11	1.85185	1.5919	0.581	1	OVER	F1PBI6
GO:0044093	positive regulation of molecular function	P	1	11	1.85185	1.5919	0.581	1	OVER	F1PBI6
GO:0045111	intermediate filament cytoskeleton	C	1	11	1.85185	1.5919	0.581	1	OVER	F1PTS8
GO:0016887	ATPase activity	F	1	11	1.85185	1.5919	0.581	1	OVER	Q0QEN2
GO:0022890	inorganic cation transmembrane transporter activity	F	1	11	1.85185	1.5919	0.581	1	OVER	Q0QEN2
GO:0005882	intermediate filament	C	1	11	1.85185	1.5919	0.581	1	OVER	F1PTS8
GO:0042330	taxis	P	1	11	1.85185	1.5919	0.581	1	OVER	F1PBI6
GO:0006935	chemotaxis	P	1	11	1.85185	1.5919	0.581	1	OVER	F1PBI6
GO:0016042	lipid catabolic process	P	1	11	1.85185	1.5919	0.581	1	OVER	J9NVE9
GO:0005783	endoplasmic reticulum	C	1	11	1.85185	1.5919	0.581	1	OVER	F1PBI6
GO:0008324	cation transmembrane transporter activity	F	1	11	1.85185	1.5919	0.581	1	OVER	Q0QEN2
GO:0030162	regulation of proteolysis	P	1	11	1.85185	1.5919	0.581	1	OVER	F1PBI6
GO:0007169	transmembrane receptor protein tyrosine kinase signaling pathway	P	1	11	1.85185	1.5919	0.581	1	OVER	F1PBI6
GO:0048646	anatomical structure formation involved in morphogenesis	P	1	11	1.85185	1.5919	0.581	1	OVER	F1PBI6
GO:0051179	localization	P	11	129	20.3704	18.6686	0.584	1	OVER	"F1Q0C1, P60529, J9NU17, J9JHF7, P60524, F1P8V6, F1PBI6, F1PGS2, J9JHZ3, F1P865, Q0QEN2"
GO:0010467	gene expression	P	5	53	9.25926	7.67004	0.585	1	OVER	"F1PBI6, J9NVE9, E2RI13, F1PGS2, E2RI99"
GO:0070062	extracellular exosome	C	3	61	5.55556	8.82779	0.611	1	UNDER	"F1PBI6, F1PGS2, F1PBK6"
GO:0065010	extracellular membrane-bounded organelle	C	3	61	5.55556	8.82779	0.611	1	UNDER	"F1PBI6, F1PGS2, F1PBK6"
GO:0043230	extracellular organelle	C	3	61	5.55556	8.82779	0.611	1	UNDER	"F1PBI6, F1PGS2, F1PBK6"
GO:1903561	extracellular vesicle	C	3	61	5.55556	8.82779	0.611	1	UNDER	"F1PBI6, F1PGS2, F1PBK6"
GO:0051094	positive regulation of developmental process	P	1	12	1.85185	1.73661	0.613	1	OVER	F1PBI6
GO:0072359	circulatory system development	P	1	12	1.85185	1.73661	0.613	1	OVER	F1PBI6
GO:0072358	cardiovascular system development	P	1	12	1.85185	1.73661	0.613	1	OVER	F1PBI6
GO:0042995	cell projection	C	1	12	1.85185	1.73661	0.613	1	OVER	J9NU17
GO:0033554	cellular response to stress	P	1	12	1.85185	1.73661	0.613	1	OVER	F1PCG4
GO:0052689	carboxylic ester hydrolase activity	F	1	12	1.85185	1.73661	0.613	1	OVER	F1PBK6
GO:0007167	enzyme linked receptor protein signaling pathway	P	1	12	1.85185	1.73661	0.613	1	OVER	F1PBI6
GO:0038023	signaling receptor activity	F	0	13	0	1.88133	0.614	1	UNDER
GO:0000902	cell morphogenesis	P	0	13	0	1.88133	0.614	1	UNDER
GO:0030182	neuron differentiation	P	0	13	0	1.88133	0.614	1	UNDER
GO:0030001	metal ion transport	P	0	13	0	1.88133	0.614	1	UNDER
GO:0051130	positive regulation of cellular component organization	P	0	14	0	2.02605	0.615	1	UNDER
GO:0045595	regulation of cell differentiation	P	0	14	0	2.02605	0.615	1	UNDER
GO:0030054	cell junction	C	0	14	0	2.02605	0.615	1	UNDER
GO:0022008	neurogenesis	P	0	15	0	2.17077	0.619	1	UNDER
GO:0032989	cellular component morphogenesis	P	0	15	0	2.17077	0.619	1	UNDER
GO:0048699	generation of neurons	P	0	15	0	2.17077	0.619	1	UNDER
GO:0002252	immune effector process	P	0	15	0	2.17077	0.619	1	UNDER
GO:0030030	cell projection organization	P	0	17	0	2.4602	0.631	1	UNDER
GO:0051240	positive regulation of multicellular organismal process	P	2	18	3.7037	2.60492	0.639	1	OVER	"F1PBI6, F1PGS2"
GO:0009199	ribonucleoside triphosphate metabolic process	P	2	18	3.7037	2.60492	0.639	1	OVER	"P52784, Q0QEN2"
GO:0009167	purine ribonucleoside monophosphate metabolic process	P	2	18	3.7037	2.60492	0.639	1	OVER	"P52784, Q0QEN2"
GO:0009161	ribonucleoside monophosphate metabolic process	P	2	18	3.7037	2.60492	0.639	1	OVER	"P52784, Q0QEN2"
GO:0009144	purine nucleoside triphosphate metabolic process	P	2	18	3.7037	2.60492	0.639	1	OVER	"P52784, Q0QEN2"
GO:0009141	nucleoside triphosphate metabolic process	P	2	18	3.7037	2.60492	0.639	1	OVER	"P52784, Q0QEN2"
GO:0009126	purine nucleoside monophosphate metabolic process	P	2	18	3.7037	2.60492	0.639	1	OVER	"P52784, Q0QEN2"
GO:0009123	nucleoside monophosphate metabolic process	P	2	18	3.7037	2.60492	0.639	1	OVER	"P52784, Q0QEN2"
GO:0009119	ribonucleoside metabolic process	P	2	18	3.7037	2.60492	0.639	1	OVER	"P52784, Q0QEN2"
GO:0009116	nucleoside metabolic process	P	2	18	3.7037	2.60492	0.639	1	OVER	"P52784, Q0QEN2"
GO:1901657	glycosyl compound metabolic process	P	2	18	3.7037	2.60492	0.639	1	OVER	"P52784, Q0QEN2"
GO:0046128	purine ribonucleoside metabolic process	P	2	18	3.7037	2.60492	0.639	1	OVER	"P52784, Q0QEN2"
GO:0016772	"transferase activity, transferring phosphorus-containing groups"	F	2	18	3.7037	2.60492	0.639	1	OVER	"P52784, E2R5H4"
GO:0051049	regulation of transport	P	2	18	3.7037	2.60492	0.639	1	OVER	"F1PBI6, F1PGS2"
GO:0046034	ATP metabolic process	P	2	18	3.7037	2.60492	0.639	1	OVER	"P52784, Q0QEN2"
GO:0042278	purine nucleoside metabolic process	P	2	18	3.7037	2.60492	0.639	1	OVER	"P52784, Q0QEN2"
GO:0031324	negative regulation of cellular metabolic process	P	2	18	3.7037	2.60492	0.639	1	OVER	"F1PBI6, J9NVE9"
GO:0009205	purine ribonucleoside triphosphate metabolic process	P	2	18	3.7037	2.60492	0.639	1	OVER	"P52784, Q0QEN2"
GO:0031982	vesicle	C	4	73	7.40741	10.5644	0.64	1	UNDER	"F1PBI6, F1P6P2, F1PGS2, F1PBK6"
GO:0006508	proteolysis	P	4	71	7.40741	10.275	0.64	1	UNDER	"J9PB81, F1PBI6, F1PGS2, E2QW34"
GO:0048856	anatomical structure development	P	4	74	7.40741	10.7091	0.641	1	UNDER	"E2R5H4, F1PBI6, J9NVT1, E2RI99"
GO:0050794	regulation of cellular process	P	18	220	33.3333	31.8379	0.645	1	OVER	"F1PDY8, F1PCG4, F1PF31, F1PN38, F1PE38, E2RIG8, F1P8G0, E2R5H4, F1PBI6, J9NVE9, F1PBL4, J9NWQ5, E2RI13, Q9MZD3, F1PGS2, E2RQF8, E2RI99, C0LQL0"
GO:0006725	cellular aromatic compound metabolic process	P	7	77	12.963	11.1433	0.645	1	OVER	"P52784, F1PPB6, F1PBI6, J9NVE9, E2RI13, E2RI99, Q0QEN2"
GO:0044267	cellular protein metabolic process	P	7	77	12.963	11.1433	0.645	1	OVER	"F1PN38, E2R5H4, F1PBI6, J9NVE9, Q9MZD3, F1PGS2, E2QW34"
GO:0050896	response to stimulus	P	15	221	27.7778	31.9826	0.645	1	UNDER	"J9PB81, F1PDY8, F1PCG4, F1PN38, E2RIG8, F1P8G0, F1PBI6, J9NVE9, F1PBL4, F1PGS2, F5XVB0, E2RQF8, E2RI99, F1PGC3, C0LQL0"
GO:0010605	negative regulation of macromolecule metabolic process	P	2	19	3.7037	2.74964	0.648	1	OVER	"F1PBI6, J9NVE9"
GO:0046496	nicotinamide nucleotide metabolic process	P	2	19	3.7037	2.74964	0.648	1	OVER	"P52784, F1PPB6"
GO:0050789	regulation of biological process	P	18	261	33.3333	37.7713	0.656	1	UNDER	"F1PDY8, F1PCG4, F1PF31, F1PN38, F1PE38, E2RIG8, F1P8G0, E2R5H4, F1PBI6, J9NVE9, F1PBL4, J9NWQ5, E2RI13, Q9MZD3, F1PGS2, E2RQF8, E2RI99, C0LQL0"
GO:0072524	pyridine-containing compound metabolic process	P	2	20	3.7037	2.89436	0.658	1	OVER	"P52784, F1PPB6"
GO:0022892	substrate-specific transporter activity	F	2	20	3.7037	2.89436	0.658	1	OVER	"F1P865, Q0QEN2"
GO:0019362	pyridine nucleotide metabolic process	P	2	20	3.7037	2.89436	0.658	1	OVER	"P52784, F1PPB6"
GO:0006733	oxidoreduction coenzyme metabolic process	P	2	20	3.7037	2.89436	0.658	1	OVER	"P52784, F1PPB6"
GO:0044763	single-organism cellular process	P	24	293	44.4444	42.4023	0.66	1	OVER	"F1PDY8, F1PCG4, P52784, E2QSF4, F1PPB6, J9NTJ3, F1PN38, F1PE38, E2RIG8, F1P8G0, E2R5H4, F1PBI6, J9P716, J9NVE9, F1PBL4, F1PGS2, J9NVT1, F1Q432, E2RQF8, F1PBK6, F1P865, E2RI99, C0LQL0, Q0QEN2"
GO:0019222	regulation of metabolic process	P	5	88	9.25926	12.7352	0.665	1	UNDER	"F1PBI6, J9NVE9, E2RI13, F1PGS2, E2RI99"
GO:0006732	coenzyme metabolic process	P	2	21	3.7037	3.03907	0.668	1	OVER	"P52784, F1PPB6"
GO:0008289	lipid binding	F	2	21	3.7037	3.03907	0.668	1	OVER	"F1PBI6, C0LQL0"
GO:0098796	membrane protein complex	C	2	21	3.7037	3.03907	0.668	1	OVER	"F1PBI6, Q0QEN2"
GO:0008104	protein localization	P	2	21	3.7037	3.03907	0.668	1	OVER	"F1Q0C1, F1PGS2"
GO:0051186	cofactor metabolic process	P	2	23	3.7037	3.32851	0.69	1	OVER	"P52784, F1PPB6"
GO:0009892	negative regulation of metabolic process	P	2	24	3.7037	3.47323	0.701	1	OVER	"F1PBI6, J9NVE9"
GO:0016787	hydrolase activity	F	8	124	14.8148	17.945	0.709	1	UNDER	"J9PB81, E2QSF4, J9NU17, J9P716, E2RRU2, F1PBK6, E2QW34, Q0QEN2"
GO:0048513	organ development	P	1	26	1.85185	3.76266	0.713	1	UNDER	J9NVT1
GO:0051128	regulation of cellular component organization	P	1	27	1.85185	3.90738	0.713	1	UNDER	F1PBI6
GO:0004252	serine-type endopeptidase activity	F	1	28	1.85185	4.0521	0.714	1	UNDER	J9PB81
GO:0017171	serine hydrolase activity	F	1	28	1.85185	4.0521	0.714	1	UNDER	J9PB81
GO:0006897	endocytosis	P	1	28	1.85185	4.0521	0.714	1	UNDER	F1PBI6
GO:0008236	serine-type peptidase activity	F	1	28	1.85185	4.0521	0.714	1	UNDER	J9PB81
GO:0065009	regulation of molecular function	P	1	29	1.85185	4.19682	0.717	1	UNDER	F1PBI6
GO:0042592	homeostatic process	P	1	30	1.85185	4.34153	0.719	1	UNDER	F1PCG4
GO:0031981	nuclear lumen	C	1	31	1.85185	4.48625	0.723	1	UNDER	E2RI99
GO:0060089	molecular transducer activity	F	1	31	1.85185	4.48625	0.723	1	UNDER	E2RI99
GO:0032774	RNA biosynthetic process	P	3	32	5.55556	4.63097	0.727	1	OVER	"J9NVE9, E2RI13, E2RI99"
GO:0044712	single-organism catabolic process	P	3	35	5.55556	5.06512	0.741	1	OVER	"P52784, F1PPB6, J9NVE9"
GO:0044248	cellular catabolic process	P	3	35	5.55556	5.06512	0.741	1	OVER	"F1PPB6, J9NVE9, E2QW34"
GO:0033036	macromolecule localization	P	3	36	5.55556	5.20984	0.747	1	OVER	"F1Q0C1, F1PBI6, F1PGS2"
GO:0051239	regulation of multicellular organismal process	P	2	41	3.7037	5.93343	0.761	1	UNDER	"F1PBI6, F1PGS2"
GO:0005509	calcium ion binding	F	4	45	7.40741	6.5123	0.767	1	OVER	"F1PE38, F1PBI6, J9NWQ5, C0LQL0"
GO:0034645	cellular macromolecule biosynthetic process	P	4	49	7.40741	7.09117	0.78	1	OVER	"F1PBI6, J9NVE9, E2RI13, E2RI99"
GO:0005886	plasma membrane	C	4	50	7.40741	7.23589	0.784	1	OVER	"J9NTJ3, J9NU17, F1PBI6, F1PGS2"
GO:0048584	positive regulation of response to stimulus	P	3	52	5.55556	7.52533	0.788	1	UNDER	"F1PBI6, J9NVE9, F1PGS2"
GO:0044281	small molecule metabolic process	P	5	63	9.25926	9.11722	0.805	1	OVER	"P52784, F1PPB6, F1PBI6, F1PBK6, Q0QEN2"
GO:0007275	multicellular organismal development	P	4	65	7.40741	9.40666	0.808	1	UNDER	"E2R5H4, F1PBI6, J9NVT1, E2RI99"
GO:0048519	negative regulation of biological process	P	4	70	7.40741	10.1302	0.81	1	UNDER	"F1PBI6, J9NVE9, F1PGS2, E2RI99"
GO:0048583	regulation of response to stimulus	P	5	83	9.25926	12.0116	0.824	1	UNDER	"F1PN38, F1PBI6, J9NVE9, F1PGS2, C0LQL0"
GO:1901360	organic cyclic compound metabolic process	P	7	85	12.963	12.301	0.826	1	OVER	"P52784, F1PPB6, F1PBI6, J9NVE9, E2RI13, E2RI99, Q0QEN2"
GO:0071840	cellular component organization or biogenesis	P	6	96	11.1111	13.8929	0.834	1	UNDER	"J9NTJ3, F1P8G0, F1PBI6, F1PBL4, F1PGS2, F1Q432"
GO:0006807	nitrogen compound metabolic process	P	9	111	16.6667	16.0637	0.844	1	OVER	"P52784, F1PPB6, F1PBI6, F6X870, J9NVE9, E2RI13, F1PBK6, E2RI99, Q0QEN2"
GO:0016020	membrane	C	11	160	20.3704	23.1548	0.864	1	UNDER	"J9NTJ3, J9NU17, J9NZW6, F1P8A6, F1PE38, E2RP87, F1PBI6, F6X870, F1PGS2, F1P865, Q0QEN2"
GO:0003824	catalytic activity	F	15	213	27.7778	30.8249	0.876	1	UNDER	"J9PB81, F1PCG4, P52784, E2QSF4, F1PPB6, J9NU17, F1PN38, E2R5H4, J9P716, F6X870, Q9MZD3, E2RRU2, F1PBK6, E2QW34, Q0QEN2"
GO:0009987	cellular process	P	31	400	57.4074	57.8871	0.883	1	OVER	"F1PDY8, F1PCG4, P52784, E2QSF4, F1PPB6, J9NTJ3, F1PF31, F1PN38, F1PE38, E2RIG8, F1P8G0, E2R5H4, F1PBI6, J9P716, F6X870, J9NVE9, F1PBL4, J9NWQ5, E2RI13, Q9MZD3, F1PGS2, J9NVT1, F1Q432, E2RQF8, F1PBK6, F1P865, E2QW34, E2RI99, F1PGC3, C0LQL0, Q0QEN2"
GO:0005634	nucleus	C	4	61	7.40741	8.82779	1	1	UNDER	"J9P6T6, E2RH23, E2RI13, E2RI99"
GO:1901564	organonitrogen compound metabolic process	P	5	65	9.25926	9.40666	1	1	OVER	"P52784, F1PPB6, F1PBI6, F6X870, Q0QEN2"
GO:1901576	organic substance biosynthetic process	P	6	79	11.1111	11.4327	1	1	OVER	"P52784, F1PBI6, J9NVE9, E2RI13, E2RI99, Q0QEN2"
GO:0044425	membrane part	C	6	79	11.1111	11.4327	1	1	OVER	"J9NTJ3, J9NU17, J9NZW6, F1PBI6, F1PGS2, Q0QEN2"
GO:0005215	transporter activity	F	2	27	3.7037	3.90738	1	1	UNDER	"F1P865, Q0QEN2"
GO:0060255	regulation of macromolecule metabolic process	P	5	68	9.25926	9.84081	1	1	UNDER	"F1PBI6, J9NVE9, E2RI13, F1PGS2, E2RI99"
GO:0031323	regulation of cellular metabolic process	P	5	68	9.25926	9.84081	1	1	UNDER	"F1PBI6, J9NVE9, E2RI13, F1PGS2, E2RI99"
GO:0009058	biosynthetic process	P	6	84	11.1111	12.1563	1	1	UNDER	"P52784, F1PBI6, J9NVE9, E2RI13, E2RI99, Q0QEN2"
GO:0065008	regulation of biological quality	P	6	80	11.1111	11.5774	1	1	UNDER	"F1PCG4, F1P8G0, F1PBI6, F1PBL4, F1PGS2, F5XVB0"
GO:0044249	cellular biosynthetic process	P	5	66	9.25926	9.55137	1	1	OVER	"F1PBI6, J9NVE9, E2RI13, E2RI99, Q0QEN2"
GO:0080090	regulation of primary metabolic process	P	5	71	9.25926	10.275	1	1	UNDER	"F1PBI6, J9NVE9, E2RI13, F1PGS2, E2RI99"
GO:0044707	single-multicellular organism process	P	9	117	16.6667	16.932	1	1	OVER	"J9NU17, F1P8G0, E2R5H4, F1PBI6, F1PBL4, F1PGS2, F5XVB0, J9NVT1, E2RI99"
GO:0044723	single-organism carbohydrate metabolic process	P	2	26	3.7037	3.76266	1	1	OVER	"P52784, F1PBI6"
GO:0007166	cell surface receptor signaling pathway	P	2	26	3.7037	3.76266	1	1	OVER	"F1PBI6, F1PGS2"
GO:0012505	endomembrane system	C	2	29	3.7037	4.19682	1	1	UNDER	"F1PBI6, F1PGS2"
GO:0016491	oxidoreductase activity	F	2	29	3.7037	4.19682	1	1	UNDER	"F1PCG4, F6X870"
GO:0032879	regulation of localization	P	2	30	3.7037	4.34153	1	1	UNDER	"F1PBI6, F1PGS2"
GO:0048731	system development	P	4	56	7.40741	8.1042	1	1	UNDER	"E2R5H4, F1PBI6, J9NVT1, E2RI99"
GO:0016788	"hydrolase activity, acting on ester bonds"	F	1	24	1.85185	3.47323	1	1	UNDER	F1PBK6
GO:0006928	movement of cell or subcellular component	P	1	24	1.85185	3.47323	1	1	UNDER	F1PBI6
GO:0043231	intracellular membrane-bounded organelle	C	8	115	14.8148	16.6425	1	1	UNDER	"J9PB81, J9P6T6, E2RH23, F1PBI6, E2RI13, F1PGS2, E2RI99, Q0QEN2"
GO:0016740	transferase activity	F	3	39	5.55556	5.64399	1	1	OVER	"P52784, F1PN38, E2R5H4"
GO:0009056	catabolic process	P	4	60	7.40741	8.68307	1	1	UNDER	"P52784, F1PPB6, J9NVE9, E2QW34"
GO:0009059	macromolecule biosynthetic process	P	4	52	7.40741	7.52533	1	1	OVER	"F1PBI6, J9NVE9, E2RI13, E2RI99"
GO:0071944	cell periphery	C	4	52	7.40741	7.52533	1	1	OVER	"J9NTJ3, J9NU17, F1PBI6, F1PGS2"
GO:1901575	organic substance catabolic process	P	4	52	7.40741	7.52533	1	1	OVER	"P52784, F1PPB6, J9NVE9, E2QW34"
GO:0016043	cellular component organization	P	6	88	11.1111	12.7352	1	1	UNDER	"J9NTJ3, F1P8G0, F1PBI6, F1PBL4, F1PGS2, F1Q432"
GO:0050790	regulation of catalytic activity	P	1	22	1.85185	3.18379	1	1	UNDER	F1PBI6
GO:0006909	phagocytosis	P	1	22	1.85185	3.18379	1	1	UNDER	F1PBI6
GO:0055114	oxidation-reduction process	P	2	32	3.7037	4.63097	1	1	UNDER	"F1PCG4, F6X870"
GO:0044260	cellular macromolecule metabolic process	P	9	121	16.6667	17.5109	1	1	UNDER	"F1PN38, E2R5H4, F1PBI6, J9NVE9, E2RI13, Q9MZD3, F1PGS2, E2QW34, E2RI99"
GO:0016192	vesicle-mediated transport	P	2	37	3.7037	5.35456	1	1	UNDER	"F1PBI6, F1PGS2"
GO:0044710	single-organism metabolic process	P	10	136	18.5185	19.6816	1	1	UNDER	"F1PCG4, P52784, F1PPB6, F1PBI6, F6X870, J9NVE9, F1PGS2, F1Q432, F1PBK6, Q0QEN2"
GO:0090304	nucleic acid metabolic process	P	3	44	5.55556	6.36758	1	1	UNDER	"J9NVE9, E2RI13, E2RI99"
GO:0048523	negative regulation of cellular process	P	4	53	7.40741	7.67004	1	1	OVER	"F1PBI6, J9NVE9, F1PGS2, E2RI99"
GO:0032501	multicellular organismal process	P	9	126	16.6667	18.2344	1	1	UNDER	"J9NU17, F1P8G0, E2R5H4, F1PBI6, F1PBL4, F1PGS2, F5XVB0, J9NVT1, E2RI99"
GO:0044711	single-organism biosynthetic process	P	2	34	3.7037	4.92041	1	1	UNDER	"P52784, Q0QEN2"
GO:0005975	carbohydrate metabolic process	P	2	34	3.7037	4.92041	1	1	UNDER	"P52784, F1PBI6"
GO:0040011	locomotion	P	1	23	1.85185	3.32851	1	1	UNDER	F1PBI6
GO:0006091	generation of precursor metabolites and energy	P	1	23	1.85185	3.32851	1	1	UNDER	P52784
GO:0016070	RNA metabolic process	P	3	40	5.55556	5.78871	1	1	UNDER	"J9NVE9, E2RI13, E2RI99"
GO:0009057	macromolecule catabolic process	P	1	21	1.85185	3.03907	1	1	UNDER	E2QW34
GO:0044283	small molecule biosynthetic process	P	1	21	1.85185	3.03907	1	1	UNDER	P52784
GO:0043009	chordate embryonic development	P	0	1	0	0.144718	1	1	OVER
GO:0015204	urea transmembrane transporter activity	F	0	1	0	0.144718	1	1	OVER
GO:0004364	glutathione transferase activity	F	0	1	0	0.144718	1	1	OVER
GO:2000114	regulation of establishment of cell polarity	P	0	1	0	0.144718	1	1	OVER
GO:0007623	circadian rhythm	P	0	1	0	0.144718	1	1	OVER
GO:0006536	glutamate metabolic process	P	0	1	0	0.144718	1	1	OVER
GO:0046982	protein heterodimerization activity	F	0	1	0	0.144718	1	1	OVER
GO:0045897	positive regulation of transcription during mitosis	P	0	1	0	0.144718	1	1	OVER
GO:0045896	regulation of transcription during mitosis	P	0	1	0	0.144718	1	1	OVER
GO:0051291	protein heterooligomerization	P	0	1	0	0.144718	1	1	OVER
GO:0032155	cell division site part	C	0	1	0	0.144718	1	1	OVER
GO:0032154	cleavage furrow	C	0	1	0	0.144718	1	1	OVER
GO:0032153	cell division site	C	0	1	0	0.144718	1	1	OVER
GO:0006526	arginine biosynthetic process	P	0	1	0	0.144718	1	1	OVER
GO:0006522	alanine metabolic process	P	0	1	0	0.144718	1	1	OVER
GO:0006521	regulation of cellular amino acid metabolic process	P	0	1	0	0.144718	1	1	OVER
GO:0051289	protein homotetramerization	P	0	1	0	0.144718	1	1	OVER
GO:0051287	NAD binding	F	0	1	0	0.144718	1	1	OVER
GO:0033238	regulation of cellular amine metabolic process	P	0	1	0	0.144718	1	1	OVER
GO:0004347	glucose-6-phosphate isomerase activity	F	0	1	0	0.144718	1	1	OVER
GO:0080171	lytic vacuole organization	P	0	1	0	0.144718	1	1	OVER
GO:0044794	positive regulation by host of viral process	P	0	1	0	0.144718	1	1	OVER
GO:0003254	regulation of membrane depolarization	P	0	1	0	0.144718	1	1	OVER
GO:0002161	aminoacyl-tRNA editing activity	F	0	1	0	0.144718	1	1	OVER
GO:0001076	"transcription factor activity, RNA polymerase II transcription factor binding"	F	0	1	0	0.144718	1	1	OVER
GO:0046961	"proton-transporting ATPase activity, rotational mechanism"	F	0	1	0	0.144718	1	1	OVER
GO:0061028	establishment of endothelial barrier	P	0	1	0	0.144718	1	1	OVER
GO:0044788	modulation by host of viral process	P	0	1	0	0.144718	1	1	OVER
GO:0004332	fructose-bisphosphate aldolase activity	F	0	1	0	0.144718	1	1	OVER
GO:0015893	drug transport	P	0	1	0	0.144718	1	1	OVER
GO:0072584	caveolin-mediated endocytosis	P	0	1	0	0.144718	1	1	OVER
GO:0071496	cellular response to external stimulus	P	0	1	0	0.144718	1	1	OVER
GO:0006509	membrane protein ectodomain proteolysis	P	0	1	0	0.144718	1	1	OVER
GO:0071493	cellular response to UV-B	P	0	1	0	0.144718	1	1	OVER
GO:0006507	GPI anchor release	P	0	1	0	0.144718	1	1	OVER
GO:0006505	GPI anchor metabolic process	P	0	1	0	0.144718	1	1	OVER
GO:0051262	protein tetramerization	P	0	1	0	0.144718	1	1	OVER
GO:0015889	cobalamin transport	P	0	1	0	0.144718	1	1	OVER
GO:0016972	thiol oxidase activity	F	0	1	0	0.144718	1	1	OVER
GO:0004322	ferroxidase activity	F	0	1	0	0.144718	1	1	OVER
GO:0015886	heme transport	P	0	1	0	0.144718	1	1	OVER
GO:0002149	hypochlorous acid biosynthetic process	P	0	1	0	0.144718	1	1	OVER
GO:0002148	hypochlorous acid metabolic process	P	0	1	0	0.144718	1	1	OVER
GO:0042594	response to starvation	P	0	1	0	0.144718	1	1	OVER
GO:0071482	cellular response to light stimulus	P	0	1	0	0.144718	1	1	OVER
GO:0046949	fatty-acyl-CoA biosynthetic process	P	0	1	0	0.144718	1	1	OVER
GO:0042590	antigen processing and presentation of exogenous peptide antigen via MHC class I	P	0	1	0	0.144718	1	1	OVER
GO:0033209	tumor necrosis factor-mediated signaling pathway	P	0	1	0	0.144718	1	1	OVER
GO:0051251	positive regulation of lymphocyte activation	P	0	1	0	0.144718	1	1	OVER
GO:0061001	regulation of dendritic spine morphogenesis	P	0	1	0	0.144718	1	1	OVER
GO:0071478	cellular response to radiation	P	0	1	0	0.144718	1	1	OVER
GO:0001047	core promoter binding	F	0	1	0	0.144718	1	1	OVER
GO:0001046	core promoter sequence-specific DNA binding	F	0	1	0	0.144718	1	1	OVER
GO:0042574	retinal metabolic process	P	0	1	0	0.144718	1	1	OVER
GO:0045833	negative regulation of lipid metabolic process	P	0	1	0	0.144718	1	1	OVER
GO:0090599	alpha-glucosidase activity	F	0	1	0	0.144718	1	1	OVER
GO:0044744	protein targeting to nucleus	P	0	1	0	0.144718	1	1	OVER
GO:0003206	cardiac chamber morphogenesis	P	0	1	0	0.144718	1	1	OVER
GO:0003205	cardiac chamber development	P	0	1	0	0.144718	1	1	OVER
GO:0072542	protein phosphatase activator activity	F	0	1	0	0.144718	1	1	OVER
GO:0042567	insulin-like growth factor ternary complex	C	0	1	0	0.144718	1	1	OVER
GO:0042562	hormone binding	F	0	1	0	0.144718	1	1	OVER
GO:0046915	transition metal ion transmembrane transporter activity	F	0	1	0	0.144718	1	1	OVER
GO:0034987	immunoglobulin receptor binding	F	0	1	0	0.144718	1	1	OVER
GO:0051225	spindle assembly	P	0	1	0	0.144718	1	1	OVER
GO:0015840	urea transport	P	0	1	0	0.144718	1	1	OVER
GO:1903358	regulation of Golgi organization	P	0	1	0	0.144718	1	1	OVER
GO:0002102	podosome	C	0	1	0	0.144718	1	1	OVER
GO:0038096	Fc-gamma receptor signaling pathway involved in phagocytosis	P	0	1	0	0.144718	1	1	OVER
GO:0034979	NAD-dependent protein deacetylase activity	F	0	1	0	0.144718	1	1	OVER
GO:0038094	Fc-gamma receptor signaling pathway	P	0	1	0	0.144718	1	1	OVER
GO:0051213	dioxygenase activity	F	0	1	0	0.144718	1	1	OVER
GO:0004998	transferrin receptor activity	F	0	1	0	0.144718	1	1	OVER
GO:0090576	RNA polymerase III transcription factor complex	C	0	1	0	0.144718	1	1	OVER
GO:0072527	pyrimidine-containing compound metabolic process	P	0	1	0	0.144718	1	1	OVER
GO:0061684	chaperone-mediated autophagy	P	0	1	0	0.144718	1	1	OVER
GO:0045807	positive regulation of endocytosis	P	0	1	0	0.144718	1	1	OVER
GO:0003899	DNA-directed RNA polymerase activity	F	0	1	0	0.144718	1	1	OVER
GO:0072510	trivalent inorganic cation transmembrane transporter activity	F	0	1	0	0.144718	1	1	OVER
GO:0042537	benzene-containing compound metabolic process	P	0	1	0	0.144718	1	1	OVER
GO:1990000	amyloid fibril formation	P	0	1	0	0.144718	1	1	OVER
GO:0008094	DNA-dependent ATPase activity	F	0	1	0	0.144718	1	1	OVER
GO:0071417	cellular response to organonitrogen compound	P	0	1	0	0.144718	1	1	OVER
GO:0070328	triglyceride homeostasis	P	0	1	0	0.144718	1	1	OVER
GO:0070327	thyroid hormone transport	P	0	1	0	0.144718	1	1	OVER
GO:1903322	positive regulation of protein modification by small protein conjugation or removal	P	0	1	0	0.144718	1	1	OVER
GO:1903321	negative regulation of protein modification by small protein conjugation or removal	P	0	1	0	0.144718	1	1	OVER
GO:0070324	thyroid hormone binding	F	0	1	0	0.144718	1	1	OVER
GO:1903320	regulation of protein modification by small protein conjugation or removal	P	0	1	0	0.144718	1	1	OVER
GO:0030593	neutrophil chemotaxis	P	0	1	0	0.144718	1	1	OVER
GO:0038061	NIK/NF-kappaB signaling	P	0	1	0	0.144718	1	1	OVER
GO:0008088	axon cargo transport	P	0	1	0	0.144718	1	1	OVER
GO:0051899	membrane depolarization	P	0	1	0	0.144718	1	1	OVER
GO:0090533	cation-transporting ATPase complex	C	0	1	0	0.144718	1	1	OVER
GO:0014706	striated muscle tissue development	P	0	1	0	0.144718	1	1	OVER
GO:0031669	cellular response to nutrient levels	P	0	1	0	0.144718	1	1	OVER
GO:0031668	cellular response to extracellular stimulus	P	0	1	0	0.144718	1	1	OVER
GO:0031667	response to nutrient levels	P	0	1	0	0.144718	1	1	OVER
GO:0070304	positive regulation of stress-activated protein kinase signaling cascade	P	0	1	0	0.144718	1	1	OVER
GO:1900034	regulation of cellular response to heat	P	0	1	0	0.144718	1	1	OVER
GO:0090527	actin filament reorganization	P	0	1	0	0.144718	1	1	OVER
GO:0050798	activated T cell proliferation	P	0	1	0	0.144718	1	1	OVER
GO:0003857	3-hydroxyacyl-CoA dehydrogenase activity	F	0	1	0	0.144718	1	1	OVER
GO:0060541	respiratory system development	P	0	1	0	0.144718	1	1	OVER
GO:0012510	trans-Golgi network transport vesicle membrane	C	0	1	0	0.144718	1	1	OVER
GO:1900026	positive regulation of substrate adhesion-dependent cell spreading	P	0	1	0	0.144718	1	1	OVER
GO:1900024	regulation of substrate adhesion-dependent cell spreading	P	0	1	0	0.144718	1	1	OVER
GO:0003847	1-alkyl-2-acetylglycerophosphocholine esterase activity	F	0	1	0	0.144718	1	1	OVER
GO:0060537	muscle tissue development	P	0	1	0	0.144718	1	1	OVER
GO:0031648	protein destabilization	P	0	1	0	0.144718	1	1	OVER
GO:0002755	MyD88-dependent toll-like receptor signaling pathway	P	0	1	0	0.144718	1	1	OVER
GO:0001666	response to hypoxia	P	0	1	0	0.144718	1	1	OVER
GO:0048496	maintenance of organ identity	P	0	1	0	0.144718	1	1	OVER
GO:0050777	negative regulation of immune response	P	0	1	0	0.144718	1	1	OVER
GO:0090505	epiboly involved in wound healing	P	0	1	0	0.144718	1	1	OVER
GO:0090504	epiboly	P	0	1	0	0.144718	1	1	OVER
GO:0090502	"RNA phosphodiester bond hydrolysis, endonucleolytic"	P	0	1	0	0.144718	1	1	OVER
GO:0050773	regulation of dendrite development	P	0	1	0	0.144718	1	1	OVER
GO:0090501	RNA phosphodiester bond hydrolysis	P	0	1	0	0.144718	1	1	OVER
GO:0008038	neuron recognition	P	0	1	0	0.144718	1	1	OVER
GO:0008037	cell recognition	P	0	1	0	0.144718	1	1	OVER
GO:0048489	synaptic vesicle transport	P	0	1	0	0.144718	1	1	OVER
GO:0051851	modification by host of symbiont morphology or physiology	P	0	1	0	0.144718	1	1	OVER
GO:0050766	positive regulation of phagocytosis	P	0	1	0	0.144718	1	1	OVER
GO:0050764	regulation of phagocytosis	P	0	1	0	0.144718	1	1	OVER
GO:0098687	chromosomal region	C	0	1	0	0.144718	1	1	OVER
GO:0003823	antigen binding	F	0	1	0	0.144718	1	1	OVER
GO:0070988	demethylation	P	0	1	0	0.144718	1	1	OVER
GO:0004908	interleukin-1 receptor activity	F	0	1	0	0.144718	1	1	OVER
GO:0048475	coated membrane	C	0	1	0	0.144718	1	1	OVER
GO:0048471	perinuclear region of cytoplasm	C	0	1	0	0.144718	1	1	OVER
GO:0003810	protein-glutamine gamma-glutamyltransferase activity	F	0	1	0	0.144718	1	1	OVER
GO:0030522	intracellular receptor signaling pathway	P	0	1	0	0.144718	1	1	OVER
GO:0030521	androgen receptor signaling pathway	P	0	1	0	0.144718	1	1	OVER
GO:0050748	negative regulation of lipoprotein metabolic process	P	0	1	0	0.144718	1	1	OVER
GO:0050746	regulation of lipoprotein metabolic process	P	0	1	0	0.144718	1	1	OVER
GO:0030518	intracellular steroid hormone receptor signaling pathway	P	0	1	0	0.144718	1	1	OVER
GO:0002713	negative regulation of B cell mediated immunity	P	0	1	0	0.144718	1	1	OVER
GO:0002712	regulation of B cell mediated immunity	P	0	1	0	0.144718	1	1	OVER
GO:0051828	entry into other organism involved in symbiotic interaction	P	0	1	0	0.144718	1	1	OVER
GO:0086009	membrane repolarization	P	0	1	0	0.144718	1	1	OVER
GO:0002707	negative regulation of lymphocyte mediated immunity	P	0	1	0	0.144718	1	1	OVER
GO:0002706	regulation of lymphocyte mediated immunity	P	0	1	0	0.144718	1	1	OVER
GO:0030509	BMP signaling pathway	P	0	1	0	0.144718	1	1	OVER
GO:0002704	negative regulation of leukocyte mediated immunity	P	0	1	0	0.144718	1	1	OVER
GO:0002703	regulation of leukocyte mediated immunity	P	0	1	0	0.144718	1	1	OVER
GO:1903955	positive regulation of protein targeting to mitochondrion	P	0	1	0	0.144718	1	1	OVER
GO:0030500	regulation of bone mineralization	P	0	1	0	0.144718	1	1	OVER
GO:0051817	modification of morphology or physiology of other organism involved in symbiotic interaction	P	0	1	0	0.144718	1	1	OVER
GO:0044091	membrane biogenesis	P	0	1	0	0.144718	1	1	OVER
GO:0050729	positive regulation of inflammatory response	P	0	1	0	0.144718	1	1	OVER
GO:0050728	negative regulation of inflammatory response	P	0	1	0	0.144718	1	1	OVER
GO:0016289	CoA hydrolase activity	F	0	1	0	0.144718	1	1	OVER
GO:1902857	positive regulation of nonmotile primary cilium assembly	P	0	1	0	0.144718	1	1	OVER
GO:1902855	regulation of nonmotile primary cilium assembly	P	0	1	0	0.144718	1	1	OVER
GO:1902850	microtubule cytoskeleton organization involved in mitosis	P	0	1	0	0.144718	1	1	OVER
GO:0051806	entry into cell of other organism involved in symbiotic interaction	P	0	1	0	0.144718	1	1	OVER
GO:0009792	embryo development ending in birth or egg hatching	P	0	1	0	0.144718	1	1	OVER
GO:0010985	negative regulation of lipoprotein particle clearance	P	0	1	0	0.144718	1	1	OVER
GO:0010984	regulation of lipoprotein particle clearance	P	0	1	0	0.144718	1	1	OVER
GO:0070938	contractile ring	C	0	1	0	0.144718	1	1	OVER
GO:0016279	protein-lysine N-methyltransferase activity	F	0	1	0	0.144718	1	1	OVER
GO:0016278	lysine N-methyltransferase activity	F	0	1	0	0.144718	1	1	OVER
GO:0070936	protein K48-linked ubiquitination	P	0	1	0	0.144718	1	1	OVER
GO:0070932	histone H3 deacetylation	P	0	1	0	0.144718	1	1	OVER
GO:0050707	regulation of cytokine secretion	P	0	1	0	0.144718	1	1	OVER
GO:0010970	microtubule-based transport	P	0	1	0	0.144718	1	1	OVER
GO:0045159	myosin II binding	F	0	1	0	0.144718	1	1	OVER
GO:0097530	granulocyte migration	P	0	1	0	0.144718	1	1	OVER
GO:0016264	gap junction assembly	P	0	1	0	0.144718	1	1	OVER
GO:0007597	"blood coagulation, intrinsic pathway"	P	0	1	0	0.144718	1	1	OVER
GO:1903919	negative regulation of actin filament severing	P	0	1	0	0.144718	1	1	OVER
GO:1903918	regulation of actin filament severing	P	0	1	0	0.144718	1	1	OVER
GO:0048407	platelet-derived growth factor binding	F	0	1	0	0.144718	1	1	OVER
GO:0010959	regulation of metal ion transport	P	0	1	0	0.144718	1	1	OVER
GO:0036477	somatodendritic compartment	C	0	1	0	0.144718	1	1	OVER
GO:0010952	positive regulation of peptidase activity	P	0	1	0	0.144718	1	1	OVER
GO:0010950	positive regulation of endopeptidase activity	P	0	1	0	0.144718	1	1	OVER
GO:1903909	regulation of receptor clustering	P	0	1	0	0.144718	1	1	OVER
GO:0006497	protein lipidation	P	0	1	0	0.144718	1	1	OVER
GO:1903906	regulation of plasma membrane raft polarization	P	0	1	0	0.144718	1	1	OVER
GO:0097513	myosin II filament	C	0	1	0	0.144718	1	1	OVER
GO:1903903	regulation of establishment of T cell polarity	P	0	1	0	0.144718	1	1	OVER
GO:0016248	channel inhibitor activity	F	0	1	0	0.144718	1	1	OVER
GO:0016247	channel regulator activity	F	0	1	0	0.144718	1	1	OVER
GO:1903901	negative regulation of viral life cycle	P	0	1	0	0.144718	1	1	OVER
GO:0014066	regulation of phosphatidylinositol 3-kinase signaling	P	0	1	0	0.144718	1	1	OVER
GO:0010948	negative regulation of cell cycle process	P	0	1	0	0.144718	1	1	OVER
GO:2000060	positive regulation of protein ubiquitination involved in ubiquitin-dependent protein catabolic process	P	0	1	0	0.144718	1	1	OVER
GO:0035371	microtubule plus-end	C	0	1	0	0.144718	1	1	OVER
GO:0006482	protein demethylation	P	0	1	0	0.144718	1	1	OVER
GO:1902807	negative regulation of cell cycle G1/S phase transition	P	0	1	0	0.144718	1	1	OVER
GO:0016236	macroautophagy	P	0	1	0	0.144718	1	1	OVER
GO:1902806	regulation of cell cycle G1/S phase transition	P	0	1	0	0.144718	1	1	OVER
GO:0016233	telomere capping	P	0	1	0	0.144718	1	1	OVER
GO:0045121	membrane raft	C	0	1	0	0.144718	1	1	OVER
GO:0005391	sodium:potassium-exchanging ATPase activity	F	0	1	0	0.144718	1	1	OVER
GO:0033194	response to hydroperoxide	P	0	1	0	0.144718	1	1	OVER
GO:2000058	regulation of protein ubiquitination involved in ubiquitin-dependent protein catabolic process	P	0	1	0	0.144718	1	1	OVER
GO:0007568	aging	P	0	1	0	0.144718	1	1	OVER
GO:0006479	protein methylation	P	0	1	0	0.144718	1	1	OVER
GO:0006476	protein deacetylation	P	0	1	0	0.144718	1	1	OVER
GO:0006475	internal protein amino acid acetylation	P	0	1	0	0.144718	1	1	OVER
GO:0006473	protein acetylation	P	0	1	0	0.144718	1	1	OVER
GO:0005388	calcium-transporting ATPase activity	F	0	1	0	0.144718	1	1	OVER
GO:0016226	iron-sulfur cluster assembly	P	0	1	0	0.144718	1	1	OVER
GO:0005381	iron ion transmembrane transporter activity	F	0	1	0	0.144718	1	1	OVER
GO:0033180	"proton-transporting V-type ATPase, V1 domain"	C	0	1	0	0.144718	1	1	OVER
GO:2000045	regulation of G1/S transition of mitotic cell cycle	P	0	1	0	0.144718	1	1	OVER
GO:0032091	negative regulation of protein binding	P	0	1	0	0.144718	1	1	OVER
GO:0010922	positive regulation of phosphatase activity	P	0	1	0	0.144718	1	1	OVER
GO:0010921	regulation of phosphatase activity	P	0	1	0	0.144718	1	1	OVER
GO:0036442	hydrogen-exporting ATPase activity	F	0	1	0	0.144718	1	1	OVER
GO:0033176	proton-transporting V-type ATPase complex	C	0	1	0	0.144718	1	1	OVER
GO:0014033	neural crest cell differentiation	P	0	1	0	0.144718	1	1	OVER
GO:0014032	neural crest cell development	P	0	1	0	0.144718	1	1	OVER
GO:0014031	mesenchymal cell development	P	0	1	0	0.144718	1	1	OVER
GO:0006450	regulation of translational fidelity	P	0	1	0	0.144718	1	1	OVER
GO:2000027	regulation of organ morphogenesis	P	0	1	0	0.144718	1	1	OVER
GO:2000021	regulation of ion homeostasis	P	0	1	0	0.144718	1	1	OVER
GO:0035338	long-chain fatty-acyl-CoA biosynthetic process	P	0	1	0	0.144718	1	1	OVER
GO:0035337	fatty-acyl-CoA metabolic process	P	0	1	0	0.144718	1	1	OVER
GO:0006448	regulation of translational elongation	P	0	1	0	0.144718	1	1	OVER
GO:0035336	long-chain fatty-acyl-CoA metabolic process	P	0	1	0	0.144718	1	1	OVER
GO:0033157	regulation of intracellular protein transport	P	0	1	0	0.144718	1	1	OVER
GO:0015108	chloride transmembrane transporter activity	F	0	1	0	0.144718	1	1	OVER
GO:0015103	inorganic anion transmembrane transporter activity	F	0	1	0	0.144718	1	1	OVER
GO:2000009	negative regulation of protein localization to cell surface	P	0	1	0	0.144718	1	1	OVER
GO:2000008	regulation of protein localization to cell surface	P	0	1	0	0.144718	1	1	OVER
GO:0035313	"wound healing, spreading of epidermal cells"	P	0	1	0	0.144718	1	1	OVER
GO:0051184	cofactor transporter activity	F	0	1	0	0.144718	1	1	OVER
GO:0051183	vitamin transporter activity	F	0	1	0	0.144718	1	1	OVER
GO:0051181	cofactor transport	P	0	1	0	0.144718	1	1	OVER
GO:0003158	endothelium development	P	0	1	0	0.144718	1	1	OVER
GO:0002064	epithelial cell development	P	0	1	0	0.144718	1	1	OVER
GO:0035307	positive regulation of protein dephosphorylation	P	0	1	0	0.144718	1	1	OVER
GO:0035306	positive regulation of dephosphorylation	P	0	1	0	0.144718	1	1	OVER
GO:0035304	regulation of protein dephosphorylation	P	0	1	0	0.144718	1	1	OVER
GO:0035303	regulation of dephosphorylation	P	0	1	0	0.144718	1	1	OVER
GO:0006414	translational elongation	P	0	1	0	0.144718	1	1	OVER
GO:0032039	integrator complex	C	0	1	0	0.144718	1	1	OVER
GO:0051170	nuclear import	P	0	1	0	0.144718	1	1	OVER
GO:0071392	cellular response to estradiol stimulus	P	0	1	0	0.144718	1	1	OVER
GO:0051169	nuclear transport	P	0	1	0	0.144718	1	1	OVER
GO:0006401	RNA catabolic process	P	0	1	0	0.144718	1	1	OVER
GO:0016874	ligase activity	F	0	1	0	0.144718	1	1	OVER
GO:1903293	phosphatase complex	C	0	1	0	0.144718	1	1	OVER
GO:0046849	bone remodeling	P	0	1	0	0.144718	1	1	OVER
GO:0070293	renal absorption	P	0	1	0	0.144718	1	1	OVER
GO:0032012	regulation of ARF protein signal transduction	P	0	1	0	0.144718	1	1	OVER
GO:0032011	ARF protein signal transduction	P	0	1	0	0.144718	1	1	OVER
GO:0071378	cellular response to growth hormone stimulus	P	0	1	0	0.144718	1	1	OVER
GO:0071375	cellular response to peptide hormone stimulus	P	0	1	0	0.144718	1	1	OVER
GO:0051149	positive regulation of muscle cell differentiation	P	0	1	0	0.144718	1	1	OVER
GO:0051147	regulation of muscle cell differentiation	P	0	1	0	0.144718	1	1	OVER
GO:0051146	striated muscle cell differentiation	P	0	1	0	0.144718	1	1	OVER
GO:0016855	"racemase and epimerase activity, acting on amino acids and derivatives"	F	0	1	0	0.144718	1	1	OVER
GO:0016854	racemase and epimerase activity	F	0	1	0	0.144718	1	1	OVER
GO:0045740	positive regulation of DNA replication	P	0	1	0	0.144718	1	1	OVER
GO:0002028	regulation of sodium ion transport	P	0	1	0	0.144718	1	1	OVER
GO:0002020	protease binding	F	0	1	0	0.144718	1	1	OVER
GO:0035987	endodermal cell differentiation	P	0	1	0	0.144718	1	1	OVER
GO:0016842	amidine-lyase activity	F	0	1	0	0.144718	1	1	OVER
GO:0016840	carbon-nitrogen lyase activity	F	0	1	0	0.144718	1	1	OVER
GO:1904358	positive regulation of telomere maintenance via telomere lengthening	P	0	1	0	0.144718	1	1	OVER
GO:1904356	regulation of telomere maintenance via telomere lengthening	P	0	1	0	0.144718	1	1	OVER
GO:1904355	positive regulation of telomere capping	P	0	1	0	0.144718	1	1	OVER
GO:1904353	regulation of telomere capping	P	0	1	0	0.144718	1	1	OVER
GO:0071356	cellular response to tumor necrosis factor	P	0	1	0	0.144718	1	1	OVER
GO:0002011	morphogenesis of an epithelial sheet	P	0	1	0	0.144718	1	1	OVER
GO:1902174	positive regulation of keratinocyte apoptotic process	P	0	1	0	0.144718	1	1	OVER
GO:1902172	regulation of keratinocyte apoptotic process	P	0	1	0	0.144718	1	1	OVER
GO:0051127	positive regulation of actin nucleation	P	0	1	0	0.144718	1	1	OVER
GO:0051125	regulation of actin nucleation	P	0	1	0	0.144718	1	1	OVER
GO:0045724	positive regulation of cilium assembly	P	0	1	0	0.144718	1	1	OVER
GO:0090484	drug transporter activity	F	0	1	0	0.144718	1	1	OVER
GO:2000650	negative regulation of sodium ion transmembrane transporter activity	P	0	1	0	0.144718	1	1	OVER
GO:0042450	arginine biosynthetic process via ornithine	P	0	1	0	0.144718	1	1	OVER
GO:0005989	lactose biosynthetic process	P	0	1	0	0.144718	1	1	OVER
GO:0005988	lactose metabolic process	P	0	1	0	0.144718	1	1	OVER
GO:0005985	sucrose metabolic process	P	0	1	0	0.144718	1	1	OVER
GO:0005982	starch metabolic process	P	0	1	0	0.144718	1	1	OVER
GO:0004896	cytokine receptor activity	F	0	1	0	0.144718	1	1	OVER
GO:2000649	regulation of sodium ion transmembrane transporter activity	P	0	1	0	0.144718	1	1	OVER
GO:0009099	valine biosynthetic process	P	0	1	0	0.144718	1	1	OVER
GO:0009098	leucine biosynthetic process	P	0	1	0	0.144718	1	1	OVER
GO:0009097	isoleucine biosynthetic process	P	0	1	0	0.144718	1	1	OVER
GO:0005978	glycogen biosynthetic process	P	0	1	0	0.144718	1	1	OVER
GO:0051100	negative regulation of binding	P	0	1	0	0.144718	1	1	OVER
GO:0004882	androgen receptor activity	F	0	1	0	0.144718	1	1	OVER
GO:0003796	lysozyme activity	F	0	1	0	0.144718	1	1	OVER
GO:0060485	mesenchyme development	P	0	1	0	0.144718	1	1	OVER
GO:0009084	glutamine family amino acid biosynthetic process	P	0	1	0	0.144718	1	1	OVER
GO:0009083	branched-chain amino acid catabolic process	P	0	1	0	0.144718	1	1	OVER
GO:0016805	dipeptidase activity	F	0	1	0	0.144718	1	1	OVER
GO:0009082	branched-chain amino acid biosynthetic process	P	0	1	0	0.144718	1	1	OVER
GO:0004879	"RNA polymerase II transcription factor activity, ligand-activated sequence-specific DNA binding"	F	0	1	0	0.144718	1	1	OVER
GO:0016803	ether hydrolase activity	F	0	1	0	0.144718	1	1	OVER
GO:0016801	"hydrolase activity, acting on ether bonds"	F	0	1	0	0.144718	1	1	OVER
GO:0002698	negative regulation of immune effector process	P	0	1	0	0.144718	1	1	OVER
GO:0002697	regulation of immune effector process	P	0	1	0	0.144718	1	1	OVER
GO:0031580	membrane raft distribution	P	0	1	0	0.144718	1	1	OVER
GO:0009078	pyruvate family amino acid metabolic process	P	0	1	0	0.144718	1	1	OVER
GO:0030492	hemoglobin binding	F	0	1	0	0.144718	1	1	OVER
GO:0030490	maturation of SSU-rRNA	P	0	1	0	0.144718	1	1	OVER
GO:0031579	membrane raft organization	P	0	1	0	0.144718	1	1	OVER
GO:0043500	muscle adaptation	P	0	1	0	0.144718	1	1	OVER
GO:1903214	regulation of protein targeting to mitochondrion	P	0	1	0	0.144718	1	1	OVER
GO:0071300	cellular response to retinoic acid	P	0	1	0	0.144718	1	1	OVER
GO:0004859	phospholipase inhibitor activity	F	0	1	0	0.144718	1	1	OVER
GO:0070208	protein heterotrimerization	P	0	1	0	0.144718	1	1	OVER
GO:0070206	protein trimerization	P	0	1	0	0.144718	1	1	OVER
GO:0030478	actin cap	C	0	1	0	0.144718	1	1	OVER
GO:0002673	regulation of acute inflammatory response	P	0	1	0	0.144718	1	1	OVER
GO:1902117	positive regulation of organelle assembly	P	0	1	0	0.144718	1	1	OVER
GO:0009052	"pentose-phosphate shunt, non-oxidative branch"	P	0	1	0	0.144718	1	1	OVER
GO:0022898	regulation of transmembrane transporter activity	P	0	1	0	0.144718	1	1	OVER
GO:0051783	regulation of nuclear division	P	0	1	0	0.144718	1	1	OVER
GO:1901017	negative regulation of potassium ion transmembrane transporter activity	P	0	1	0	0.144718	1	1	OVER
GO:1901016	regulation of potassium ion transmembrane transporter activity	P	0	1	0	0.144718	1	1	OVER
GO:0005923	bicellular tight junction	C	0	1	0	0.144718	1	1	OVER
GO:0005922	connexon complex	C	0	1	0	0.144718	1	1	OVER
GO:0005921	gap junction	C	0	1	0	0.144718	1	1	OVER
GO:0031545	peptidyl-proline 4-dioxygenase activity	F	0	1	0	0.144718	1	1	OVER
GO:0031543	peptidyl-proline dioxygenase activity	F	0	1	0	0.144718	1	1	OVER
GO:0000479	"endonucleolytic cleavage of tricistronic rRNA transcript (SSU-rRNA, 5.8S rRNA, LSU-rRNA)"	P	0	1	0	0.144718	1	1	OVER
GO:0030450	"regulation of complement activation, classical pathway"	P	0	1	0	0.144718	1	1	OVER
GO:0000478	endonucleolytic cleavage involved in rRNA processing	P	0	1	0	0.144718	1	1	OVER
GO:0005913	cell-cell adherens junction	C	0	1	0	0.144718	1	1	OVER
GO:0010224	response to UV-B	P	0	1	0	0.144718	1	1	OVER
GO:0050671	positive regulation of lymphocyte proliferation	P	0	1	0	0.144718	1	1	OVER
GO:0003730	mRNA 3'-UTR binding	F	0	1	0	0.144718	1	1	OVER
GO:0030449	regulation of complement activation	P	0	1	0	0.144718	1	1	OVER
GO:0000469	cleavage involved in rRNA processing	P	0	1	0	0.144718	1	1	OVER
GO:0005905	coated pit	C	0	1	0	0.144718	1	1	OVER
GO:0000462	"maturation of SSU-rRNA from tricistronic rRNA transcript (SSU-rRNA, 5.8S rRNA, LSU-rRNA)"	P	0	1	0	0.144718	1	1	OVER
GO:0005901	caveola	C	0	1	0	0.144718	1	1	OVER
GO:0000460	maturation of 5.8S rRNA	P	0	1	0	0.144718	1	1	OVER
GO:0003729	mRNA binding	F	0	1	0	0.144718	1	1	OVER
GO:0050663	cytokine secretion	P	0	1	0	0.144718	1	1	OVER
GO:0061502	early endosome to recycling endosome transport	P	0	1	0	0.144718	1	1	OVER
GO:0031529	ruffle organization	P	0	1	0	0.144718	1	1	OVER
GO:0021772	olfactory bulb development	P	0	1	0	0.144718	1	1	OVER
GO:0060416	response to growth hormone	P	0	1	0	0.144718	1	1	OVER
GO:0003724	RNA helicase activity	F	0	1	0	0.144718	1	1	OVER
GO:0004807	triose-phosphate isomerase activity	F	0	1	0	0.144718	1	1	OVER
GO:0004806	triglyceride lipase activity	F	0	1	0	0.144718	1	1	OVER
GO:0004802	transketolase activity	F	0	1	0	0.144718	1	1	OVER
GO:0004801	sedoheptulose-7-phosphate:D-glyceraldehyde-3-phosphate glyceronetransferase activity	F	0	1	0	0.144718	1	1	OVER
GO:0003714	transcription corepressor activity	F	0	1	0	0.144718	1	1	OVER
GO:0003713	transcription coactivator activity	F	0	1	0	0.144718	1	1	OVER
GO:0018394	peptidyl-lysine acetylation	P	0	1	0	0.144718	1	1	OVER
GO:0018393	internal peptidyl-lysine acetylation	P	0	1	0	0.144718	1	1	OVER
GO:0031514	motile cilium	C	0	1	0	0.144718	1	1	OVER
GO:0097484	dendrite extension	P	0	1	0	0.144718	1	1	OVER
GO:0097480	establishment of synaptic vesicle localization	P	0	1	0	0.144718	1	1	OVER
GO:1901699	cellular response to nitrogen compound	P	0	1	0	0.144718	1	1	OVER
GO:0001530	lipopolysaccharide binding	F	0	1	0	0.144718	1	1	OVER
GO:0022843	voltage-gated cation channel activity	F	0	1	0	0.144718	1	1	OVER
GO:0003707	steroid hormone receptor activity	F	0	1	0	0.144718	1	1	OVER
GO:0097479	synaptic vesicle localization	P	0	1	0	0.144718	1	1	OVER
GO:0098562	cytoplasmic side of membrane	C	0	1	0	0.144718	1	1	OVER
GO:0046184	aldehyde biosynthetic process	P	0	1	0	0.144718	1	1	OVER
GO:0071953	elastic fiber	C	0	1	0	0.144718	1	1	OVER
GO:0001527	microfibril	C	0	1	0	0.144718	1	1	OVER
GO:1903861	positive regulation of dendrite extension	P	0	1	0	0.144718	1	1	OVER
GO:0001522	pseudouridine synthesis	P	0	1	0	0.144718	1	1	OVER
GO:1903859	regulation of dendrite extension	P	0	1	0	0.144718	1	1	OVER
GO:1901678	iron coordination entity transport	P	0	1	0	0.144718	1	1	OVER
GO:0046166	glyceraldehyde-3-phosphate biosynthetic process	P	0	1	0	0.144718	1	1	OVER
GO:0070849	response to epidermal growth factor	P	0	1	0	0.144718	1	1	OVER
GO:0016180	snRNA processing	P	0	1	0	0.144718	1	1	OVER
GO:0015091	ferric iron transmembrane transporter activity	F	0	1	0	0.144718	1	1	OVER
GO:0051702	interaction with symbiont	P	0	1	0	0.144718	1	1	OVER
GO:0051701	interaction with host	P	0	1	0	0.144718	1	1	OVER
GO:0098533	ATPase dependent transmembrane transport complex	C	0	1	0	0.144718	1	1	OVER
GO:0098531	"transcription factor activity, direct ligand regulated sequence-specific DNA binding"	F	0	1	0	0.144718	1	1	OVER
GO:1901653	cellular response to peptide	P	0	1	0	0.144718	1	1	OVER
GO:0015081	sodium ion transmembrane transporter activity	F	0	1	0	0.144718	1	1	OVER
GO:0018345	protein palmitoylation	P	0	1	0	0.144718	1	1	OVER
GO:0071918	urea transmembrane transport	P	0	1	0	0.144718	1	1	OVER
GO:1903829	positive regulation of cellular protein localization	P	0	1	0	0.144718	1	1	OVER
GO:1903828	negative regulation of cellular protein localization	P	0	1	0	0.144718	1	1	OVER
GO:0045055	regulated secretory pathway	P	0	1	0	0.144718	1	1	OVER
GO:0045053	protein retention in Golgi apparatus	P	0	1	0	0.144718	1	1	OVER
GO:0015079	potassium ion transmembrane transporter activity	F	0	1	0	0.144718	1	1	OVER
GO:2001070	starch binding	F	0	1	0	0.144718	1	1	OVER
GO:0048313	Golgi inheritance	P	0	1	0	0.144718	1	1	OVER
GO:0021700	developmental maturation	P	0	1	0	0.144718	1	1	OVER
GO:0007492	endoderm development	P	0	1	0	0.144718	1	1	OVER
GO:0048308	organelle inheritance	P	0	1	0	0.144718	1	1	OVER
GO:2001056	positive regulation of cysteine-type endopeptidase activity	P	0	1	0	0.144718	1	1	OVER
GO:0009650	UV protection	P	0	1	0	0.144718	1	1	OVER
GO:0008565	protein transporter activity	F	0	1	0	0.144718	1	1	OVER
GO:0019400	alditol metabolic process	P	0	1	0	0.144718	1	1	OVER
GO:0036361	"racemase activity, acting on amino acids and derivatives"	F	0	1	0	0.144718	1	1	OVER
GO:0006383	transcription from RNA polymerase III promoter	P	0	1	0	0.144718	1	1	OVER
GO:0008556	potassium-transporting ATPase activity	F	0	1	0	0.144718	1	1	OVER
GO:0010833	telomere maintenance via telomere lengthening	P	0	1	0	0.144718	1	1	OVER
GO:0035267	NuA4 histone acetyltransferase complex	C	0	1	0	0.144718	1	1	OVER
GO:0045010	actin nucleation	P	0	1	0	0.144718	1	1	OVER
GO:0004197	cysteine-type endopeptidase activity	F	0	1	0	0.144718	1	1	OVER
GO:0015036	disulfide oxidoreductase activity	F	0	1	0	0.144718	1	1	OVER
GO:0015035	protein disulfide oxidoreductase activity	F	0	1	0	0.144718	1	1	OVER
GO:0036344	platelet morphogenesis	P	0	1	0	0.144718	1	1	OVER
GO:0010822	positive regulation of mitochondrion organization	P	0	1	0	0.144718	1	1	OVER
GO:0010821	regulation of mitochondrion organization	P	0	1	0	0.144718	1	1	OVER
GO:0035259	glucocorticoid receptor binding	F	0	1	0	0.144718	1	1	OVER
GO:0035258	steroid hormone receptor binding	F	0	1	0	0.144718	1	1	OVER
GO:0035257	nuclear hormone receptor binding	F	0	1	0	0.144718	1	1	OVER
GO:0006367	transcription initiation from RNA polymerase II promoter	P	0	1	0	0.144718	1	1	OVER
GO:0035253	ciliary rootlet	C	0	1	0	0.144718	1	1	OVER
GO:0035250	UDP-galactosyltransferase activity	F	0	1	0	0.144718	1	1	OVER
GO:0008536	Ran GTPase binding	F	0	1	0	0.144718	1	1	OVER
GO:0010811	positive regulation of cell-substrate adhesion	P	0	1	0	0.144718	1	1	OVER
GO:0015012	heparan sulfate proteoglycan biosynthetic process	P	0	1	0	0.144718	1	1	OVER
GO:0008525	phosphatidylcholine transporter activity	F	0	1	0	0.144718	1	1	OVER
GO:0003081	regulation of systemic arterial blood pressure by renin-angiotensin	P	0	1	0	0.144718	1	1	OVER
GO:0010800	positive regulation of peptidyl-threonine phosphorylation	P	0	1	0	0.144718	1	1	OVER
GO:0052192	movement in environment of other organism involved in symbiotic interaction	P	0	1	0	0.144718	1	1	OVER
GO:0005254	chloride channel activity	F	0	1	0	0.144718	1	1	OVER
GO:0005253	anion channel activity	F	0	1	0	0.144718	1	1	OVER
GO:0015002	heme-copper terminal oxidase activity	F	0	1	0	0.144718	1	1	OVER
GO:0003073	regulation of systemic arterial blood pressure	P	0	1	0	0.144718	1	1	OVER
GO:0006338	chromatin remodeling	P	0	1	0	0.144718	1	1	OVER
GO:0005247	voltage-gated chloride channel activity	F	0	1	0	0.144718	1	1	OVER
GO:0034134	toll-like receptor 2 signaling pathway	P	0	1	0	0.144718	1	1	OVER
GO:0005245	voltage-gated calcium channel activity	F	0	1	0	0.144718	1	1	OVER
GO:0033044	regulation of chromosome organization	P	0	1	0	0.144718	1	1	OVER
GO:0051090	regulation of sequence-specific DNA binding transcription factor activity	P	0	1	0	0.144718	1	1	OVER
GO:0008509	anion transmembrane transporter activity	F	0	1	0	0.144718	1	1	OVER
GO:0007413	axonal fasciculation	P	0	1	0	0.144718	1	1	OVER
GO:0007411	axon guidance	P	0	1	0	0.144718	1	1	OVER
GO:0046777	protein autophosphorylation	P	0	1	0	0.144718	1	1	OVER
GO:0016799	"hydrolase activity, hydrolyzing N-glycosyl compounds"	F	0	1	0	0.144718	1	1	OVER
GO:0051082	unfolded protein binding	F	0	1	0	0.144718	1	1	OVER
GO:0004143	diacylglycerol kinase activity	F	0	1	0	0.144718	1	1	OVER
GO:0016790	thiolester hydrolase activity	F	0	1	0	0.144718	1	1	OVER
GO:0034112	positive regulation of homotypic cell-cell adhesion	P	0	1	0	0.144718	1	1	OVER
GO:0016782	"transferase activity, transferring sulfur-containing groups"	F	0	1	0	0.144718	1	1	OVER
GO:0015698	inorganic anion transport	P	0	1	0	0.144718	1	1	OVER
GO:0003044	regulation of systemic arterial blood pressure mediated by a chemical signal	P	0	1	0	0.144718	1	1	OVER
GO:0043495	protein anchor	F	0	1	0	0.144718	1	1	OVER
GO:0006303	double-strand break repair via nonhomologous end joining	P	0	1	0	0.144718	1	1	OVER
GO:0005219	ryanodine-sensitive calcium-release channel activity	F	0	1	0	0.144718	1	1	OVER
GO:0006302	double-strand break repair	P	0	1	0	0.144718	1	1	OVER
GO:0005218	intracellular ligand-gated calcium channel activity	F	0	1	0	0.144718	1	1	OVER
GO:0005217	intracellular ligand-gated ion channel activity	F	0	1	0	0.144718	1	1	OVER
GO:0016779	nucleotidyltransferase activity	F	0	1	0	0.144718	1	1	OVER
GO:0016778	diphosphotransferase activity	F	0	1	0	0.144718	1	1	OVER
GO:0004129	cytochrome-c oxidase activity	F	0	1	0	0.144718	1	1	OVER
GO:0045663	positive regulation of myoblast differentiation	P	0	1	0	0.144718	1	1	OVER
GO:0033013	tetrapyrrole metabolic process	P	0	1	0	0.144718	1	1	OVER
GO:0045661	regulation of myoblast differentiation	P	0	1	0	0.144718	1	1	OVER
GO:0043488	regulation of mRNA stability	P	0	1	0	0.144718	1	1	OVER
GO:0043487	regulation of RNA stability	P	0	1	0	0.144718	1	1	OVER
GO:0043484	regulation of RNA splicing	P	0	1	0	0.144718	1	1	OVER
GO:0042391	regulation of membrane potential	P	0	1	0	0.144718	1	1	OVER
GO:0016769	"transferase activity, transferring nitrogenous groups"	F	0	1	0	0.144718	1	1	OVER
GO:0051054	positive regulation of DNA metabolic process	P	0	1	0	0.144718	1	1	OVER
GO:0051052	regulation of DNA metabolic process	P	0	1	0	0.144718	1	1	OVER
GO:0016765	"transferase activity, transferring alkyl or aryl (other than methyl) groups"	F	0	1	0	0.144718	1	1	OVER
GO:0033002	muscle cell proliferation	P	0	1	0	0.144718	1	1	OVER
GO:0043470	regulation of carbohydrate catabolic process	P	0	1	0	0.144718	1	1	OVER
GO:0042383	sarcolemma	C	0	1	0	0.144718	1	1	OVER
GO:0016755	"transferase activity, transferring amino-acyl groups"	F	0	1	0	0.144718	1	1	OVER
GO:0004104	cholinesterase activity	F	0	1	0	0.144718	1	1	OVER
GO:0003014	renal system process	P	0	1	0	0.144718	1	1	OVER
GO:0003012	muscle system process	P	0	1	0	0.144718	1	1	OVER
GO:2000573	positive regulation of DNA biosynthetic process	P	0	1	0	0.144718	1	1	OVER
GO:0052126	movement in host environment	P	0	1	0	0.144718	1	1	OVER
GO:0016741	"transferase activity, transferring one-carbon groups"	F	0	1	0	0.144718	1	1	OVER
GO:0003007	heart morphogenesis	P	0	1	0	0.144718	1	1	OVER
GO:0070168	negative regulation of biomineral tissue development	P	0	1	0	0.144718	1	1	OVER
GO:0046718	viral entry into host cell	P	0	1	0	0.144718	1	1	OVER
GO:0070160	occluding junction	C	0	1	0	0.144718	1	1	OVER
GO:0006982	response to lipid hydroperoxide	P	0	1	0	0.144718	1	1	OVER
GO:0005891	voltage-gated calcium channel complex	C	0	1	0	0.144718	1	1	OVER
GO:0005890	sodium:potassium-exchanging ATPase complex	C	0	1	0	0.144718	1	1	OVER
GO:0072337	modified amino acid transport	P	0	1	0	0.144718	1	1	OVER
GO:0033692	cellular polysaccharide biosynthetic process	P	0	1	0	0.144718	1	1	OVER
GO:0090382	phagosome maturation	P	0	1	0	0.144718	1	1	OVER
GO:0018904	ether metabolic process	P	0	1	0	0.144718	1	1	OVER
GO:0016724	"oxidoreductase activity, oxidizing metal ions, oxygen as acceptor"	F	0	1	0	0.144718	1	1	OVER
GO:0051010	microtubule plus-end binding	F	0	1	0	0.144718	1	1	OVER
GO:0016722	"oxidoreductase activity, oxidizing metal ions"	F	0	1	0	0.144718	1	1	OVER
GO:0005881	cytoplasmic microtubule	C	0	1	0	0.144718	1	1	OVER
GO:0060397	JAK-STAT cascade involved in growth hormone signaling pathway	P	0	1	0	0.144718	1	1	OVER
GO:0060396	growth hormone receptor signaling pathway	P	0	1	0	0.144718	1	1	OVER
GO:1903142	positive regulation of establishment of endothelial barrier	P	0	1	0	0.144718	1	1	OVER
GO:1903140	regulation of establishment of endothelial barrier	P	0	1	0	0.144718	1	1	OVER
GO:0051005	negative regulation of lipoprotein lipase activity	P	0	1	0	0.144718	1	1	OVER
GO:0051004	regulation of lipoprotein lipase activity	P	0	1	0	0.144718	1	1	OVER
GO:0045603	positive regulation of endothelial cell differentiation	P	0	1	0	0.144718	1	1	OVER
GO:0005875	microtubule associated complex	C	0	1	0	0.144718	1	1	OVER
GO:0045601	regulation of endothelial cell differentiation	P	0	1	0	0.144718	1	1	OVER
GO:0010181	FMN binding	F	0	1	0	0.144718	1	1	OVER
GO:0071229	cellular response to acid chemical	P	0	1	0	0.144718	1	1	OVER
GO:0003697	single-stranded DNA binding	F	0	1	0	0.144718	1	1	OVER
GO:0006958	"complement activation, classical pathway"	P	0	1	0	0.144718	1	1	OVER
GO:0016706	"oxidoreductase activity, acting on paired donors, with incorporation or reduction of molecular oxygen, 2-oxoglutarate as one donor, and incorporation of one atom each of oxygen into both donors"	F	0	1	0	0.144718	1	1	OVER
GO:0043414	macromolecule methylation	P	0	1	0	0.144718	1	1	OVER
GO:0003684	damaged DNA binding	F	0	1	0	0.144718	1	1	OVER
GO:0003682	chromatin binding	F	0	1	0	0.144718	1	1	OVER
GO:0071214	cellular response to abiotic stimulus	P	0	1	0	0.144718	1	1	OVER
GO:0034739	histone deacetylase activity (H4-K16 specific)	F	0	1	0	0.144718	1	1	OVER
GO:0035821	modification of morphology or physiology of other organism	P	0	1	0	0.144718	1	1	OVER
GO:0051695	actin filament uncapping	P	0	1	0	0.144718	1	1	OVER
GO:0004751	ribose-5-phosphate isomerase activity	F	0	1	0	0.144718	1	1	OVER
GO:0002573	myeloid leukocyte differentiation	P	0	1	0	0.144718	1	1	OVER
GO:0000398	"mRNA splicing, via spliceosome"	P	0	1	0	0.144718	1	1	OVER
GO:0004749	ribose phosphate diphosphokinase activity	F	0	1	0	0.144718	1	1	OVER
GO:0004745	retinol dehydrogenase activity	F	0	1	0	0.144718	1	1	OVER
GO:0004743	pyruvate kinase activity	F	0	1	0	0.144718	1	1	OVER
GO:0060349	bone morphogenesis	P	0	1	0	0.144718	1	1	OVER
GO:0060348	bone development	P	0	1	0	0.144718	1	1	OVER
GO:0032543	mitochondrial translation	P	0	1	0	0.144718	1	1	OVER
GO:0006913	nucleocytoplasmic transport	P	0	1	0	0.144718	1	1	OVER
GO:0005826	actomyosin contractile ring	C	0	1	0	0.144718	1	1	OVER
GO:0004739	pyruvate dehydrogenase (acetyl-transferring) activity	F	0	1	0	0.144718	1	1	OVER
GO:0004738	pyruvate dehydrogenase activity	F	0	1	0	0.144718	1	1	OVER
GO:0090316	positive regulation of intracellular protein transport	P	0	1	0	0.144718	1	1	OVER
GO:0032536	regulation of cell projection size	P	0	1	0	0.144718	1	1	OVER
GO:0032532	regulation of microvillus length	P	0	1	0	0.144718	1	1	OVER
GO:0032530	regulation of microvillus organization	P	0	1	0	0.144718	1	1	OVER
GO:0071897	DNA biosynthetic process	P	0	1	0	0.144718	1	1	OVER
GO:0006907	pinocytosis	P	0	1	0	0.144718	1	1	OVER
GO:0006904	vesicle docking involved in exocytosis	P	0	1	0	0.144718	1	1	OVER
GO:0000377	"RNA splicing, via transesterification reactions with bulged adenosine as nucleophile"	P	0	1	0	0.144718	1	1	OVER
GO:0051668	localization within membrane	P	0	1	0	0.144718	1	1	OVER
GO:0000375	"RNA splicing, via transesterification reactions"	P	0	1	0	0.144718	1	1	OVER
GO:0033619	membrane protein proteolysis	P	0	1	0	0.144718	1	1	OVER
GO:0051665	membrane raft localization	P	0	1	0	0.144718	1	1	OVER
GO:0090307	mitotic spindle assembly	P	0	1	0	0.144718	1	1	OVER
GO:0090305	nucleic acid phosphodiester bond hydrolysis	P	0	1	0	0.144718	1	1	OVER
GO:0032528	microvillus organization	P	0	1	0	0.144718	1	1	OVER
GO:0032526	response to retinoic acid	P	0	1	0	0.144718	1	1	OVER
GO:0004722	protein serine/threonine phosphatase activity	F	0	1	0	0.144718	1	1	OVER
GO:0051656	establishment of organelle localization	P	0	1	0	0.144718	1	1	OVER
GO:0005802	trans-Golgi network	C	0	1	0	0.144718	1	1	OVER
GO:0048286	lung alveolus development	P	0	1	0	0.144718	1	1	OVER
GO:0004716	receptor signaling protein tyrosine kinase activity	F	0	1	0	0.144718	1	1	OVER
GO:0051650	establishment of vesicle localization	P	0	1	0	0.144718	1	1	OVER
GO:0042989	sequestering of actin monomers	P	0	1	0	0.144718	1	1	OVER
GO:0031420	alkali metal ion binding	F	0	1	0	0.144718	1	1	OVER
GO:0030331	estrogen receptor binding	F	0	1	0	0.144718	1	1	OVER
GO:0048278	vesicle docking	P	0	1	0	0.144718	1	1	OVER
GO:0004707	MAP kinase activity	F	0	1	0	0.144718	1	1	OVER
GO:0004702	receptor signaling protein serine/threonine kinase activity	F	0	1	0	0.144718	1	1	OVER
GO:0031419	cobalamin binding	F	0	1	0	0.144718	1	1	OVER
GO:0060306	regulation of membrane repolarization	P	0	1	0	0.144718	1	1	OVER
GO:0030329	prenylcysteine metabolic process	P	0	1	0	0.144718	1	1	OVER
GO:0030328	prenylcysteine catabolic process	P	0	1	0	0.144718	1	1	OVER
GO:0002521	leukocyte differentiation	P	0	1	0	0.144718	1	1	OVER
GO:0030324	lung development	P	0	1	0	0.144718	1	1	OVER
GO:0030323	respiratory tube development	P	0	1	0	0.144718	1	1	OVER
GO:0051639	actin filament network formation	P	0	1	0	0.144718	1	1	OVER
GO:0051638	barbed-end actin filament uncapping	P	0	1	0	0.144718	1	1	OVER
GO:0097372	NAD-dependent histone deacetylase activity (H3-K18 specific)	F	0	1	0	0.144718	1	1	OVER
GO:0030312	external encapsulating structure	C	0	1	0	0.144718	1	1	OVER
GO:0048251	elastic fiber assembly	P	0	1	0	0.144718	1	1	OVER
GO:0010799	regulation of peptidyl-threonine phosphorylation	P	0	1	0	0.144718	1	1	OVER
GO:0060998	regulation of dendritic spine development	P	0	1	0	0.144718	1	1	OVER
GO:0060997	dendritic spine morphogenesis	P	0	1	0	0.144718	1	1	OVER
GO:1903749	positive regulation of establishment of protein localization to mitochondrion	P	0	1	0	0.144718	1	1	OVER
GO:0060996	dendritic spine development	P	0	1	0	0.144718	1	1	OVER
GO:1903747	regulation of establishment of protein localization to mitochondrion	P	0	1	0	0.144718	1	1	OVER
GO:1901568	fatty acid derivative metabolic process	P	0	1	0	0.144718	1	1	OVER
GO:0051606	detection of stimulus	P	0	1	0	0.144718	1	1	OVER
GO:0048232	male gamete generation	P	0	1	0	0.144718	1	1	OVER
GO:0016073	snRNA metabolic process	P	0	1	0	0.144718	1	1	OVER
GO:0000301	"retrograde transport, vesicle recycling within Golgi"	P	0	1	0	0.144718	1	1	OVER
GO:0009584	detection of visible light	P	0	1	0	0.144718	1	1	OVER
GO:0009583	detection of light stimulus	P	0	1	0	0.144718	1	1	OVER
GO:1901552	positive regulation of endothelial cell development	P	0	1	0	0.144718	1	1	OVER
GO:0009582	detection of abiotic stimulus	P	0	1	0	0.144718	1	1	OVER
GO:0009581	detection of external stimulus	P	0	1	0	0.144718	1	1	OVER
GO:1901550	regulation of endothelial cell development	P	0	1	0	0.144718	1	1	OVER
GO:0036293	response to decreased oxygen levels	P	0	1	0	0.144718	1	1	OVER
GO:0010766	negative regulation of sodium ion transport	P	0	1	0	0.144718	1	1	OVER
GO:0008483	transaminase activity	F	0	1	0	0.144718	1	1	OVER
GO:0071805	potassium ion transmembrane transport	P	0	1	0	0.144718	1	1	OVER
GO:0071804	cellular potassium ion transport	P	0	1	0	0.144718	1	1	OVER
GO:0071801	regulation of podosome assembly	P	0	1	0	0.144718	1	1	OVER
GO:0071800	podosome assembly	P	0	1	0	0.144718	1	1	OVER
GO:0016050	vesicle organization	P	0	1	0	0.144718	1	1	OVER
GO:0009566	fertilization	P	0	1	0	0.144718	1	1	OVER
GO:0035189	Rb-E2F complex	C	0	1	0	0.144718	1	1	OVER
GO:0017136	NAD-dependent histone deacetylase activity	F	0	1	0	0.144718	1	1	OVER
GO:0018210	peptidyl-threonine modification	P	0	1	0	0.144718	1	1	OVER
GO:0097306	cellular response to alcohol	P	0	1	0	0.144718	1	1	OVER
GO:0097305	response to alcohol	P	0	1	0	0.144718	1	1	OVER
GO:0007369	gastrulation	P	0	1	0	0.144718	1	1	OVER
GO:0018205	peptidyl-lysine modification	P	0	1	0	0.144718	1	1	OVER
GO:0017119	Golgi transport complex	C	0	1	0	0.144718	1	1	OVER
GO:0006278	RNA-dependent DNA replication	P	0	1	0	0.144718	1	1	OVER
GO:0046006	regulation of activated T cell proliferation	P	0	1	0	0.144718	1	1	OVER
GO:0006275	regulation of DNA replication	P	0	1	0	0.144718	1	1	OVER
GO:0030955	potassium ion binding	F	0	1	0	0.144718	1	1	OVER
GO:0034062	RNA polymerase activity	F	0	1	0	0.144718	1	1	OVER
GO:0010714	positive regulation of collagen metabolic process	P	0	1	0	0.144718	1	1	OVER
GO:0008430	selenium binding	F	0	1	0	0.144718	1	1	OVER
GO:0036230	granulocyte activation	P	0	1	0	0.144718	1	1	OVER
GO:0005164	tumor necrosis factor receptor binding	F	0	1	0	0.144718	1	1	OVER
GO:0048875	chemical homeostasis within a tissue	P	0	1	0	0.144718	1	1	OVER
GO:0007338	single fertilization	P	0	1	0	0.144718	1	1	OVER
GO:0048872	homeostasis of number of cells	P	0	1	0	0.144718	1	1	OVER
GO:0004063	aryldialkylphosphatase activity	F	0	1	0	0.144718	1	1	OVER
GO:0048864	stem cell development	P	0	1	0	0.144718	1	1	OVER
GO:0048863	stem cell differentiation	P	0	1	0	0.144718	1	1	OVER
GO:0004056	argininosuccinate lyase activity	F	0	1	0	0.144718	1	1	OVER
GO:0008408	3'-5' exonuclease activity	F	0	1	0	0.144718	1	1	OVER
GO:0018874	benzoate metabolic process	P	0	1	0	0.144718	1	1	OVER
GO:0000922	spindle pole	C	0	1	0	0.144718	1	1	OVER
GO:0004033	aldo-keto reductase (NADP) activity	F	0	1	0	0.144718	1	1	OVER
GO:0043395	heparan sulfate proteoglycan binding	F	0	1	0	0.144718	1	1	OVER
GO:0006206	pyrimidine nucleobase metabolic process	P	0	1	0	0.144718	1	1	OVER
GO:0016676	"oxidoreductase activity, acting on a heme group of donors, oxygen as acceptor"	F	0	1	0	0.144718	1	1	OVER
GO:0016675	"oxidoreductase activity, acting on a heme group of donors"	F	0	1	0	0.144718	1	1	OVER
GO:0004012	phospholipid-translocating ATPase activity	F	0	1	0	0.144718	1	1	OVER
GO:0048814	regulation of dendrite morphogenesis	P	0	1	0	0.144718	1	1	OVER
GO:0048813	dendrite morphogenesis	P	0	1	0	0.144718	1	1	OVER
GO:0004003	ATP-dependent DNA helicase activity	F	0	1	0	0.144718	1	1	OVER
GO:0044456	synapse part	C	0	1	0	0.144718	1	1	OVER
GO:0044455	mitochondrial membrane part	C	0	1	0	0.144718	1	1	OVER
GO:0044452	nucleolar part	C	0	1	0	0.144718	1	1	OVER
GO:0019915	lipid storage	P	0	1	0	0.144718	1	1	OVER
GO:0042274	ribosomal small subunit biogenesis	P	0	1	0	0.144718	1	1	OVER
GO:0070076	histone lysine demethylation	P	0	1	0	0.144718	1	1	OVER
GO:0006891	intra-Golgi vesicle-mediated transport	P	0	1	0	0.144718	1	1	OVER
GO:0044449	contractile fiber part	C	0	1	0	0.144718	1	1	OVER
GO:0019902	phosphatase binding	F	0	1	0	0.144718	1	1	OVER
GO:0070069	cytochrome complex	C	0	1	0	0.144718	1	1	OVER
GO:0019901	protein kinase binding	F	0	1	0	0.144718	1	1	OVER
GO:0019900	kinase binding	F	0	1	0	0.144718	1	1	OVER
GO:0006885	regulation of pH	P	0	1	0	0.144718	1	1	OVER
GO:0005798	Golgi-associated vesicle	C	0	1	0	0.144718	1	1	OVER
GO:0005793	endoplasmic reticulum-Golgi intermediate compartment	C	0	1	0	0.144718	1	1	OVER
GO:0016624	"oxidoreductase activity, acting on the aldehyde or oxo group of donors, disulfide as acceptor"	F	0	1	0	0.144718	1	1	OVER
GO:0016620	"oxidoreductase activity, acting on the aldehyde or oxo group of donors, NAD or NADP as acceptor"	F	0	1	0	0.144718	1	1	OVER
GO:1903046	meiotic cell cycle process	P	0	1	0	0.144718	1	1	OVER
GO:0033572	transferrin transport	P	0	1	0	0.144718	1	1	OVER
GO:0090263	positive regulation of canonical Wnt signaling pathway	P	0	1	0	0.144718	1	1	OVER
GO:1903039	positive regulation of leukocyte cell-cell adhesion	P	0	1	0	0.144718	1	1	OVER
GO:0031398	positive regulation of protein ubiquitination	P	0	1	0	0.144718	1	1	OVER
GO:0031397	negative regulation of protein ubiquitination	P	0	1	0	0.144718	1	1	OVER
GO:0031396	regulation of protein ubiquitination	P	0	1	0	0.144718	1	1	OVER
GO:0006855	drug transmembrane transport	P	0	1	0	0.144718	1	1	OVER
GO:0006851	mitochondrial calcium ion transport	P	0	1	0	0.144718	1	1	OVER
GO:0044409	entry into host	P	0	1	0	0.144718	1	1	OVER
GO:2000427	positive regulation of apoptotic cell clearance	P	0	1	0	0.144718	1	1	OVER
GO:2000425	regulation of apoptotic cell clearance	P	0	1	0	0.144718	1	1	OVER
GO:0043312	neutrophil degranulation	P	0	1	0	0.144718	1	1	OVER
GO:0005759	mitochondrial matrix	C	0	1	0	0.144718	1	1	OVER
GO:0034644	cellular response to UV	P	0	1	0	0.144718	1	1	OVER
GO:0033559	unsaturated fatty acid metabolic process	P	0	1	0	0.144718	1	1	OVER
GO:0033558	protein deacetylase activity	F	0	1	0	0.144718	1	1	OVER
GO:0042219	cellular modified amino acid catabolic process	P	0	1	0	0.144718	1	1	OVER
GO:0071107	response to parathyroid hormone	P	0	1	0	0.144718	1	1	OVER
GO:0002483	antigen processing and presentation of endogenous peptide antigen	P	0	1	0	0.144718	1	1	OVER
GO:0030286	dynein complex	C	0	1	0	0.144718	1	1	OVER
GO:0035725	sodium ion transmembrane transport	P	0	1	0	0.144718	1	1	OVER
GO:0005743	mitochondrial inner membrane	C	0	1	0	0.144718	1	1	OVER
GO:0005740	mitochondrial envelope	C	0	1	0	0.144718	1	1	OVER
GO:0032452	histone demethylase activity	F	0	1	0	0.144718	1	1	OVER
GO:0002479	"antigen processing and presentation of exogenous peptide antigen via MHC class I, TAP-dependent"	P	0	1	0	0.144718	1	1	OVER
GO:0032451	demethylase activity	F	0	1	0	0.144718	1	1	OVER
GO:0002478	antigen processing and presentation of exogenous peptide antigen	P	0	1	0	0.144718	1	1	OVER
GO:0070006	metalloaminopeptidase activity	F	0	1	0	0.144718	1	1	OVER
GO:0030278	regulation of ossification	P	0	1	0	0.144718	1	1	OVER
GO:0006825	copper ion transport	P	0	1	0	0.144718	1	1	OVER
GO:0006821	chloride transport	P	0	1	0	0.144718	1	1	OVER
GO:0005731	nucleolus organizer region	C	0	1	0	0.144718	1	1	OVER
GO:0030260	entry into host cell	P	0	1	0	0.144718	1	1	OVER
GO:0034612	response to tumor necrosis factor	P	0	1	0	0.144718	1	1	OVER
GO:0004630	phospholipase D activity	F	0	1	0	0.144718	1	1	OVER
GO:0031348	negative regulation of defense response	P	0	1	0	0.144718	1	1	OVER
GO:0032432	actin filament bundle	C	0	1	0	0.144718	1	1	OVER
GO:0000279	M phase	P	0	1	0	0.144718	1	1	OVER
GO:0006803	obsolete glutathione conjugation reaction	P	0	1	0	0.144718	1	1	OVER
GO:0034605	cellular response to heat	P	0	1	0	0.144718	1	1	OVER
GO:0052650	NADP-retinol dehydrogenase activity	F	0	1	0	0.144718	1	1	OVER
GO:0000271	polysaccharide biosynthetic process	P	0	1	0	0.144718	1	1	OVER
GO:0048193	Golgi vesicle transport	P	0	1	0	0.144718	1	1	OVER
GO:0004622	lysophospholipase activity	F	0	1	0	0.144718	1	1	OVER
GO:0004621	glycosylphosphatidylinositol phospholipase D activity	F	0	1	0	0.144718	1	1	OVER
GO:0031334	positive regulation of protein complex assembly	P	0	1	0	0.144718	1	1	OVER
GO:0002446	neutrophil mediated immunity	P	0	1	0	0.144718	1	1	OVER
GO:0002444	myeloid leukocyte mediated immunity	P	0	1	0	0.144718	1	1	OVER
GO:0002440	production of molecular mediator of immune response	P	0	1	0	0.144718	1	1	OVER
GO:0032413	negative regulation of ion transmembrane transporter activity	P	0	1	0	0.144718	1	1	OVER
GO:0032412	regulation of ion transmembrane transporter activity	P	0	1	0	0.144718	1	1	OVER
GO:0032411	positive regulation of transporter activity	P	0	1	0	0.144718	1	1	OVER
GO:0032410	negative regulation of transporter activity	P	0	1	0	0.144718	1	1	OVER
GO:1903689	"regulation of wound healing, spreading of epidermal cells"	P	0	1	0	0.144718	1	1	OVER
GO:0030239	myofibril assembly	P	0	1	0	0.144718	1	1	OVER
GO:0042887	amide transmembrane transporter activity	F	0	1	0	0.144718	1	1	OVER
GO:0002433	immune response-regulating cell surface receptor signaling pathway involved in phagocytosis	P	0	1	0	0.144718	1	1	OVER
GO:0071773	cellular response to BMP stimulus	P	0	1	0	0.144718	1	1	OVER
GO:0002431	Fc receptor mediated stimulatory signaling pathway	P	0	1	0	0.144718	1	1	OVER
GO:0071772	response to BMP	P	0	1	0	0.144718	1	1	OVER
GO:1902593	single-organism nuclear import	P	0	1	0	0.144718	1	1	OVER
GO:0051540	metal cluster binding	F	0	1	0	0.144718	1	1	OVER
GO:0004602	glutathione peroxidase activity	F	0	1	0	0.144718	1	1	OVER
GO:0043968	histone H2A acetylation	P	0	1	0	0.144718	1	1	OVER
GO:0043967	histone H4 acetylation	P	0	1	0	0.144718	1	1	OVER
GO:0030228	lipoprotein particle receptor activity	F	0	1	0	0.144718	1	1	OVER
GO:0097284	hepatocyte apoptotic process	P	0	1	0	0.144718	1	1	OVER
GO:0030224	monocyte differentiation	P	0	1	0	0.144718	1	1	OVER
GO:0097283	keratinocyte apoptotic process	P	0	1	0	0.144718	1	1	OVER
GO:0030220	platelet formation	P	0	1	0	0.144718	1	1	OVER
GO:0051536	iron-sulfur cluster binding	F	0	1	0	0.144718	1	1	OVER
GO:0048167	regulation of synaptic plasticity	P	0	1	0	0.144718	1	1	OVER
GO:0071757	hexameric IgM immunoglobulin complex	C	0	1	0	0.144718	1	1	OVER
GO:0071756	pentameric IgM immunoglobulin complex	C	0	1	0	0.144718	1	1	OVER
GO:0071754	"IgM immunoglobulin complex, circulating"	C	0	1	0	0.144718	1	1	OVER
GO:0071753	IgM immunoglobulin complex	C	0	1	0	0.144718	1	1	OVER
GO:0071750	dimeric IgA immunoglobulin complex	C	0	1	0	0.144718	1	1	OVER
GO:0070665	positive regulation of leukocyte proliferation	P	0	1	0	0.144718	1	1	OVER
GO:0021543	pallium development	P	0	1	0	0.144718	1	1	OVER
GO:0071749	polymeric IgA immunoglobulin complex	C	0	1	0	0.144718	1	1	OVER
GO:0071746	"IgA immunoglobulin complex, circulating"	C	0	1	0	0.144718	1	1	OVER
GO:0071745	IgA immunoglobulin complex	C	0	1	0	0.144718	1	1	OVER
GO:1903651	positive regulation of cytoplasmic transport	P	0	1	0	0.144718	1	1	OVER
GO:0017080	sodium channel regulator activity	F	0	1	0	0.144718	1	1	OVER
GO:0030201	heparan sulfate proteoglycan metabolic process	P	0	1	0	0.144718	1	1	OVER
GO:1902562	H4 histone acetyltransferase complex	C	0	1	0	0.144718	1	1	OVER
GO:0022624	proteasome accessory complex	C	0	1	0	0.144718	1	1	OVER
GO:0010694	positive regulation of alkaline phosphatase activity	P	0	1	0	0.144718	1	1	OVER
GO:0010692	regulation of alkaline phosphatase activity	P	0	1	0	0.144718	1	1	OVER
GO:0042834	peptidoglycan binding	F	0	1	0	0.144718	1	1	OVER
GO:0097242	beta-amyloid clearance	P	0	1	0	0.144718	1	1	OVER
GO:0042827	platelet dense granule	C	0	1	0	0.144718	1	1	OVER
GO:0019221	cytokine-mediated signaling pathway	P	0	1	0	0.144718	1	1	OVER
GO:0071709	membrane assembly	P	0	1	0	0.144718	1	1	OVER
GO:0043902	positive regulation of multi-organism process	P	0	1	0	0.144718	1	1	OVER
GO:0031975	envelope	C	0	1	0	0.144718	1	1	OVER
GO:0001990	regulation of systemic arterial blood pressure by hormone	P	0	1	0	0.144718	1	1	OVER
GO:0019218	regulation of steroid metabolic process	P	0	1	0	0.144718	1	1	OVER
GO:0019217	regulation of fatty acid metabolic process	P	0	1	0	0.144718	1	1	OVER
GO:0008374	O-acyltransferase activity	F	0	1	0	0.144718	1	1	OVER
GO:0019213	deacetylase activity	F	0	1	0	0.144718	1	1	OVER
GO:0019211	phosphatase activator activity	F	0	1	0	0.144718	1	1	OVER
GO:0007283	spermatogenesis	P	0	1	0	0.144718	1	1	OVER
GO:0017038	protein import	P	0	1	0	0.144718	1	1	OVER
GO:0031967	organelle envelope	C	0	1	0	0.144718	1	1	OVER
GO:0031966	mitochondrial membrane	C	0	1	0	0.144718	1	1	OVER
GO:0030874	nucleolar chromatin	C	0	1	0	0.144718	1	1	OVER
GO:0019208	phosphatase regulator activity	F	0	1	0	0.144718	1	1	OVER
GO:0009451	RNA modification	P	0	1	0	0.144718	1	1	OVER
GO:0019203	carbohydrate phosphatase activity	F	0	1	0	0.144718	1	1	OVER
GO:0008360	regulation of cell shape	P	0	1	0	0.144718	1	1	OVER
GO:0018112	proline racemase activity	F	0	1	0	0.144718	1	1	OVER
GO:0017022	myosin binding	F	0	1	0	0.144718	1	1	OVER
GO:0005093	Rab GDP-dissociation inhibitor activity	F	0	1	0	0.144718	1	1	OVER
GO:0005092	GDP-dissociation inhibitor activity	F	0	1	0	0.144718	1	1	OVER
GO:0018107	peptidyl-threonine phosphorylation	P	0	1	0	0.144718	1	1	OVER
GO:0017016	Ras GTPase binding	F	0	1	0	0.144718	1	1	OVER
GO:0005089	Rho guanyl-nucleotide exchange factor activity	F	0	1	0	0.144718	1	1	OVER
GO:0005088	Ras guanyl-nucleotide exchange factor activity	F	0	1	0	0.144718	1	1	OVER
GO:0030858	positive regulation of epithelial cell differentiation	P	0	1	0	0.144718	1	1	OVER
GO:0005086	ARF guanyl-nucleotide exchange factor activity	F	0	1	0	0.144718	1	1	OVER
GO:0030856	regulation of epithelial cell differentiation	P	0	1	0	0.144718	1	1	OVER
GO:0030855	epithelial cell differentiation	P	0	1	0	0.144718	1	1	OVER
GO:0005080	protein kinase C binding	F	0	1	0	0.144718	1	1	OVER
GO:0030850	prostate gland development	P	0	1	0	0.144718	1	1	OVER
GO:0007259	JAK-STAT cascade	P	0	1	0	0.144718	1	1	OVER
GO:0035058	nonmotile primary cilium assembly	P	0	1	0	0.144718	1	1	OVER
GO:0007254	JNK cascade	P	0	1	0	0.144718	1	1	OVER
GO:0035051	cardiocyte differentiation	P	0	1	0	0.144718	1	1	OVER
GO:0001955	blood vessel maturation	P	0	1	0	0.144718	1	1	OVER
GO:0048786	presynaptic active zone	C	0	1	0	0.144718	1	1	OVER
GO:0019897	extrinsic component of plasma membrane	C	0	1	0	0.144718	1	1	OVER
GO:0008331	high voltage-gated calcium channel activity	F	0	1	0	0.144718	1	1	OVER
GO:0030838	positive regulation of actin filament polymerization	P	0	1	0	0.144718	1	1	OVER
GO:0030836	positive regulation of actin filament depolymerization	P	0	1	0	0.144718	1	1	OVER
GO:0009411	response to UV	P	0	1	0	0.144718	1	1	OVER
GO:0019888	protein phosphatase regulator activity	F	0	1	0	0.144718	1	1	OVER
GO:0019885	antigen processing and presentation of endogenous peptide antigen via MHC class I	P	0	1	0	0.144718	1	1	OVER
GO:0019884	antigen processing and presentation of exogenous antigen	P	0	1	0	0.144718	1	1	OVER
GO:0019883	antigen processing and presentation of endogenous antigen	P	0	1	0	0.144718	1	1	OVER
GO:0048771	tissue remodeling	P	0	1	0	0.144718	1	1	OVER
GO:0046597	negative regulation of viral entry into host cell	P	0	1	0	0.144718	1	1	OVER
GO:0046596	regulation of viral entry into host cell	P	0	1	0	0.144718	1	1	OVER
GO:0005055	laminin receptor activity	F	0	1	0	0.144718	1	1	OVER
GO:0009408	response to heat	P	0	1	0	0.144718	1	1	OVER
GO:0001931	uropod	C	0	1	0	0.144718	1	1	OVER
GO:0048762	mesenchymal cell differentiation	P	0	1	0	0.144718	1	1	OVER
GO:0007224	smoothened signaling pathway	P	0	1	0	0.144718	1	1	OVER
GO:0019871	sodium channel inhibitor activity	F	0	1	0	0.144718	1	1	OVER
GO:0019870	potassium channel inhibitor activity	F	0	1	0	0.144718	1	1	OVER
GO:0035023	regulation of Rho protein signal transduction	P	0	1	0	0.144718	1	1	OVER
GO:0031902	late endosome membrane	C	0	1	0	0.144718	1	1	OVER
GO:0031901	early endosome membrane	C	0	1	0	0.144718	1	1	OVER
GO:0045494	photoreceptor cell maintenance	P	0	1	0	0.144718	1	1	OVER
GO:0005041	low-density lipoprotein receptor activity	F	0	1	0	0.144718	1	1	OVER
GO:0008308	voltage-gated anion channel activity	F	0	1	0	0.144718	1	1	OVER
GO:0019866	organelle inner membrane	C	0	1	0	0.144718	1	1	OVER
GO:0007213	G-protein coupled acetylcholine receptor signaling pathway	P	0	1	0	0.144718	1	1	OVER
GO:0047661	amino-acid racemase activity	F	0	1	0	0.144718	1	1	OVER
GO:0006123	"mitochondrial electron transport, cytochrome c to oxygen"	P	0	1	0	0.144718	1	1	OVER
GO:0016592	mediator complex	C	0	1	0	0.144718	1	1	OVER
GO:0044391	ribosomal subunit	C	0	1	0	0.144718	1	1	OVER
GO:0007205	protein kinase C-activating G-protein coupled receptor signaling pathway	P	0	1	0	0.144718	1	1	OVER
GO:0005021	vascular endothelial growth factor-activated receptor activity	F	0	1	0	0.144718	1	1	OVER
GO:0043299	leukocyte degranulation	P	0	1	0	0.144718	1	1	OVER
GO:0048738	cardiac muscle tissue development	P	0	1	0	0.144718	1	1	OVER
GO:0043296	apical junction complex	C	0	1	0	0.144718	1	1	OVER
GO:0043292	contractile fiber	C	0	1	0	0.144718	1	1	OVER
GO:0006109	regulation of carbohydrate metabolic process	P	0	1	0	0.144718	1	1	OVER
GO:0019840	isoprenoid binding	F	0	1	0	0.144718	1	1	OVER
GO:0005019	platelet-derived growth factor beta-receptor activity	F	0	1	0	0.144718	1	1	OVER
GO:0006102	isocitrate metabolic process	P	0	1	0	0.144718	1	1	OVER
GO:0005017	platelet-derived growth factor-activated receptor activity	F	0	1	0	0.144718	1	1	OVER
GO:0016577	histone demethylation	P	0	1	0	0.144718	1	1	OVER
GO:0016575	histone deacetylation	P	0	1	0	0.144718	1	1	OVER
GO:0016573	histone acetylation	P	0	1	0	0.144718	1	1	OVER
GO:0043280	positive regulation of cysteine-type endopeptidase activity involved in apoptotic process	P	0	1	0	0.144718	1	1	OVER
GO:0045446	endothelial cell differentiation	P	0	1	0	0.144718	1	1	OVER
GO:0045445	myoblast differentiation	P	0	1	0	0.144718	1	1	OVER
GO:0044354	macropinosome	C	0	1	0	0.144718	1	1	OVER
GO:0044352	pinosome	C	0	1	0	0.144718	1	1	OVER
GO:0043267	negative regulation of potassium ion transport	P	0	1	0	0.144718	1	1	OVER
GO:0044351	macropinocytosis	P	0	1	0	0.144718	1	1	OVER
GO:0043266	regulation of potassium ion transport	P	0	1	0	0.144718	1	1	OVER
GO:0048705	skeletal system morphogenesis	P	0	1	0	0.144718	1	1	OVER
GO:1904063	negative regulation of cation transmembrane transport	P	0	1	0	0.144718	1	1	OVER
GO:1904062	regulation of cation transmembrane transport	P	0	1	0	0.144718	1	1	OVER
GO:0047617	acyl-CoA hydrolase activity	F	0	1	0	0.144718	1	1	OVER
GO:0015459	potassium channel regulator activity	F	0	1	0	0.144718	1	1	OVER
GO:0042161	lipoprotein oxidation	P	0	1	0	0.144718	1	1	OVER
GO:0042160	lipoprotein modification	P	0	1	0	0.144718	1	1	OVER
GO:0043243	positive regulation of protein complex disassembly	P	0	1	0	0.144718	1	1	OVER
GO:0042158	lipoprotein biosynthetic process	P	0	1	0	0.144718	1	1	OVER
GO:0006778	porphyrin-containing compound metabolic process	P	0	1	0	0.144718	1	1	OVER
GO:0016529	sarcoplasmic reticulum	C	0	1	0	0.144718	1	1	OVER
GO:0006771	riboflavin metabolic process	P	0	1	0	0.144718	1	1	OVER
GO:0005681	spliceosomal complex	C	0	1	0	0.144718	1	1	OVER
GO:0044325	ion channel binding	F	0	1	0	0.144718	1	1	OVER
GO:0090175	regulation of establishment of planar polarity	P	0	1	0	0.144718	1	1	OVER
GO:0090170	regulation of Golgi inheritance	P	0	1	0	0.144718	1	1	OVER
GO:0060192	negative regulation of lipase activity	P	0	1	0	0.144718	1	1	OVER
GO:0060191	regulation of lipase activity	P	0	1	0	0.144718	1	1	OVER
GO:0006769	nicotinamide metabolic process	P	0	1	0	0.144718	1	1	OVER
GO:0006768	biotin metabolic process	P	0	1	0	0.144718	1	1	OVER
GO:0044319	"wound healing, spreading of cells"	P	0	1	0	0.144718	1	1	OVER
GO:0005674	transcription factor TFIIF complex	C	0	1	0	0.144718	1	1	OVER
GO:0032388	positive regulation of intracellular transport	P	0	1	0	0.144718	1	1	OVER
GO:0032383	regulation of intracellular cholesterol transport	P	0	1	0	0.144718	1	1	OVER
GO:0032380	regulation of intracellular sterol transport	P	0	1	0	0.144718	1	1	OVER
GO:0032377	regulation of intracellular lipid transport	P	0	1	0	0.144718	1	1	OVER
GO:0004571	"mannosyl-oligosaccharide 1,2-alpha-mannosidase activity"	F	0	1	0	0.144718	1	1	OVER
GO:0071013	catalytic step 2 spliceosome	C	0	1	0	0.144718	1	1	OVER
GO:0043209	myelin sheath	C	0	1	0	0.144718	1	1	OVER
GO:0032367	intracellular cholesterol transport	P	0	1	0	0.144718	1	1	OVER
GO:0032366	intracellular sterol transport	P	0	1	0	0.144718	1	1	OVER
GO:0043206	extracellular fibril organization	P	0	1	0	0.144718	1	1	OVER
GO:0032365	intracellular lipid transport	P	0	1	0	0.144718	1	1	OVER
GO:0043205	fibril	C	0	1	0	0.144718	1	1	OVER
GO:0042119	neutrophil activation	P	0	1	0	0.144718	1	1	OVER
GO:0004551	nucleotide diphosphatase activity	F	0	1	0	0.144718	1	1	OVER
GO:0032355	response to estradiol	P	0	1	0	0.144718	1	1	OVER
GO:0002377	immunoglobulin production	P	0	1	0	0.144718	1	1	OVER
GO:0042104	positive regulation of activated T cell proliferation	P	0	1	0	0.144718	1	1	OVER
GO:0042102	positive regulation of T cell proliferation	P	0	1	0	0.144718	1	1	OVER
GO:0030177	positive regulation of Wnt signaling pathway	P	0	1	0	0.144718	1	1	OVER
GO:0030175	filopodium	C	0	1	0	0.144718	1	1	OVER
GO:0031254	cell trailing edge	C	0	1	0	0.144718	1	1	OVER
GO:0002366	leukocyte activation involved in immune response	P	0	1	0	0.144718	1	1	OVER
GO:0030166	proteoglycan biosynthetic process	P	0	1	0	0.144718	1	1	OVER
GO:0035601	protein deacylation	P	0	1	0	0.144718	1	1	OVER
GO:0031248	protein acetyltransferase complex	C	0	1	0	0.144718	1	1	OVER
GO:0071695	anatomical structure maturation	P	0	1	0	0.144718	1	1	OVER
GO:0000178	exosome (RNase complex)	C	0	1	0	0.144718	1	1	OVER
GO:0005618	cell wall	C	0	1	0	0.144718	1	1	OVER
GO:0034504	protein localization to nucleus	P	0	1	0	0.144718	1	1	OVER
GO:0090108	positive regulation of high-density lipoprotein particle assembly	P	0	1	0	0.144718	1	1	OVER
GO:0004528	phosphodiesterase I activity	F	0	1	0	0.144718	1	1	OVER
GO:0090107	regulation of high-density lipoprotein particle assembly	P	0	1	0	0.144718	1	1	OVER
GO:1990266	neutrophil migration	P	0	1	0	0.144718	1	1	OVER
GO:0031235	intrinsic component of the cytoplasmic side of the plasma membrane	C	0	1	0	0.144718	1	1	OVER
GO:0042799	histone methyltransferase activity (H4-K20 specific)	F	0	1	0	0.144718	1	1	OVER
GO:0031232	extrinsic component of external side of plasma membrane	C	0	1	0	0.144718	1	1	OVER
GO:0030140	trans-Golgi network transport vesicle	C	0	1	0	0.144718	1	1	OVER
GO:0005604	basement membrane	C	0	1	0	0.144718	1	1	OVER
GO:0030136	clathrin-coated vesicle	C	0	1	0	0.144718	1	1	OVER
GO:0030135	coated vesicle	C	0	1	0	0.144718	1	1	OVER
GO:0097193	intrinsic apoptotic signaling pathway	P	0	1	0	0.144718	1	1	OVER
GO:0030133	transport vesicle	C	0	1	0	0.144718	1	1	OVER
GO:0030132	clathrin coat of coated pit	C	0	1	0	0.144718	1	1	OVER
GO:0070585	protein localization to mitochondrion	P	0	1	0	0.144718	1	1	OVER
GO:0030130	clathrin coat of trans-Golgi network vesicle	C	0	1	0	0.144718	1	1	OVER
GO:1902493	acetyltransferase complex	C	0	1	0	0.144718	1	1	OVER
[truncated: 397 more rows]
